1     **Atp $\Theta$  is an inhibitor of F<sub>0</sub>F<sub>1</sub> ATP synthase to arrest ATP hydrolysis**  
2                     **during low-energy conditions in cyanobacteria**

3

4     Kuo Song<sup>1</sup>, Desirée Baumgartner<sup>1,§</sup>, Martin Hagemann<sup>2</sup>, Alicia M. Muro-Pastor<sup>3</sup>,  
5     Sandra Maaß<sup>4</sup>, Dörte Becher<sup>4</sup>, and Wolfgang R. Hess<sup>1,\*</sup>

6

7     <sup>1</sup>University of Freiburg, Faculty of Biology, Genetics and Experimental Bioinformatics,  
8     Schänzlestr. 1, D-79104 Freiburg, Germany;

9     <sup>2</sup>University of Rostock, Institute of Biosciences, Plant Physiology Department, Albert-  
10     Einstein-Str. 3, D-18059 Rostock, Germany;

11    <sup>3</sup>Instituto de Bioquímica Vegetal y Fotosíntesis, Consejo Superior de Investigaciones  
12    Científicas and Universidad de Sevilla, E-41092 Sevilla, Spain;

13    <sup>4</sup>University of Greifswald, Department of Microbial Proteomics, Institute of  
14    Microbiology, D-17489 Greifswald, Germany.

15

16    \***Lead contact:** [wolfgang.hess@biologie.uni-freiburg.de](mailto:wolfgang.hess@biologie.uni-freiburg.de), University of Freiburg,  
17    Faculty of Biology, Genetics and Experimental Bioinformatics, Schänzlestr. 1, D-  
18    79104 Freiburg, Germany; phone: +49-761-2032796; FAX: +49-761-2032745.

19

20    <sup>§</sup>Current address: Laboratory for MEMS Applications, IMTEK - Department of  
21    Microsystems Engineering, University of Freiburg, Georges-Köhler-Allee 103, D-  
22    79110 Freiburg, Germany

## 23 **Summary**

24 Biological processes in all living cells are powered by ATP, a nearly universal  
25 molecule of energy transfer. ATP synthases produce ATP utilizing proton gradients  
26 that are usually generated by either respiration or photosynthesis. However,  
27 cyanobacteria are unique in combining photosynthetic and respiratory electron  
28 transport chains in the same membrane system, the thylakoids. How cyanobacteria  
29 prevent the futile reverse operation of ATP synthase under unfavorable conditions  
30 pumping protons while hydrolyzing ATP is mostly unclear. Here, we provide evidence  
31 that the small protein Atp $\Theta$ , which is widely conserved in cyanobacteria, is mainly  
32 fulfilling this task. The expression of Atp $\Theta$  becomes induced under conditions such  
33 as darkness or heat shock, which can lead to a weakening of the proton gradient.  
34 Translational fusions of Atp $\Theta$  to the green fluorescent protein revealed targeting to  
35 the thylakoid membrane. Immunoprecipitation assays followed by mass spectrometry  
36 and far Western blots identified subunits of ATP synthase as interacting partners of  
37 Atp $\Theta$ . ATP hydrolysis assays with isolated membrane fractions as well as purified  
38 ATP synthase complexes demonstrated that Atp $\Theta$  inhibits ATPase activity in a dose-  
39 dependent manner similar to the F<sub>0</sub>F<sub>1</sub>-ATP synthase inhibitor N,N-  
40 dicyclohexylcarbodiimide. The results show that, even in a well-investigated process,  
41 crucial new players can be discovered if small proteins are taken into consideration  
42 and indicate that ATP synthase activity can be controlled in surprisingly different  
43 ways.

44

45 **Keywords:** ATP synthase, cyanobacteria, *Synechocystis*, small proteins

46

47

## 48 **Introduction**

49 ATP synthases of the  $F_0F_1$  type are multisubunit protein complexes anchored to  
50 membranes that convert proton (or sodium ion) gradients into chemical energy in the  
51 form of ATP<sup>1</sup>. Proton gradients are established by divergent processes, such as  
52 respiratory electron transport in mitochondria or photosynthetic electron transport in  
53 chloroplasts. Mitochondria and chloroplasts originate from the endosymbiotic uptake  
54 of an  $\alpha$ -proteobacterium and a cyanobacterium, respectively<sup>2-7</sup>. Therefore, it is not  
55 surprising that  $F_0F_1$ -ATP synthases share close functional and structural similarities  
56 among eukaryotes and bacteria.

57 Under conditions weakening the proton gradient, ATP synthases can operate  
58 backwards, pumping protons while hydrolyzing ATP. Therefore, different regulatory  
59 mechanisms have evolved to stop the futile reverse reaction. Mitochondrial ATP  
60 synthases employ small peptides for inhibition, one, designated inhibitory factor 1  
61 (IF1), in mammals<sup>8,9</sup> and three, called IF1, STF1 and STF2, in yeast<sup>10,11</sup>. IF1 inhibits  
62 the ATPase activity of mitochondrial ATP synthase under conditions when the  
63 membrane potential collapses, e.g., during anoxia in cancer cells<sup>12</sup>. In bacteria, some  
64 regulatory factors of ATP synthase are known as well, such as the  $\zeta$  subunit in  
65 *Paracoccus denitrificans* and related  $\alpha$ -proteobacteria<sup>13</sup>, but IF1, as a representative  
66 of the class of alpha-helical basic peptide inhibitors in eukaryotes, has no homologs  
67 among prokaryotes.

68 Plant chloroplasts, in contrast, use a different mechanism to inhibit the  
69 hydrolysis activity of ATP synthase. Here, the  $\gamma$  subunit encoded by *atpC* responds to  
70 redox signals, thereby preventing the back reaction of ATP synthase when the  
71 photosynthetic proton gradient ceases, particularly during the night<sup>14</sup>. The *atpC* gene

72 and the encoded  $\gamma$  subunit in chloroplasts are very similar to their homologs from  
73 cyanobacteria, consistent with the endosymbiotic origin of chloroplast ATP synthase  
74 from an ancient cyanobacterium<sup>15</sup>. The chloroplast  $\gamma$  subunit, however, possesses a  
75 short insertion of nine extra amino acids (–EICDINGXC–), including two cysteine  
76 residues<sup>16</sup> that can form a disulfide bond under oxidizing conditions, which entirely  
77 blocks rotation and prevents ATP hydrolysis<sup>1</sup>. Upon illumination, the chloroplasts  
78 become reduced, and the disulfide bridge in the  $\gamma$  subunit opens, which activates  
79 ATP synthase because the  $\gamma$  subunit can rotate freely. The respective nine-amino-  
80 acid insertion in chloroplast  $\gamma$  subunits is strictly conserved in plants but missing from  
81 any of the homologs in cyanobacteria<sup>17</sup>. In contrast to chloroplasts, in cyanobacteria,  
82 photosynthetic and respiratory electron transport chains are both located in the same  
83 membrane system, the thylakoids, and even share some components<sup>18</sup>. Therefore,  
84 cyanobacteria cannot shut down ATP synthase as strictly as plant chloroplasts during  
85 the dark phase, since both the photosynthetic and respiratory electron chains  
86 generate proton gradients at the thylakoid membranes during day and night,  
87 respectively, which are used by the same ATP synthase for the generation of ATP<sup>19</sup>.  
88 Hence, the cyanobacterial ATP synthase complexes cannot be controlled by the  
89 same redox-sensitive mechanism as operating in the chloroplast.

90 Nevertheless, several mechanisms have been identified for the regulation of  
91 ATP synthase activity in cyanobacteria, the ADP-mediated inhibition that relies on the  
92  $\gamma$  subunit<sup>20</sup> and  $\epsilon$  subunit-mediated inhibition<sup>21</sup>. These findings provided hints that  
93 also mechanisms to prevent wasteful ATP hydrolysis activity of ATP synthase might  
94 exist in cyanobacteria.

95 Here, we provide evidence that a small protein previously called Norf1 (for  
96 novel ORF1) acts as ATP synthase regulator in cyanobacteria. Norf1 was initially

97 discovered in the model cyanobacterium *Synechocystis* sp. PCC 6803  
98 (*Synechocystis* 6803) based on the detection of its mRNA in transcriptomic  
99 datasets<sup>22,23</sup>. *Synechocystis* 6803 Norf1 comprises 48 amino acids, and its  
100 expression was confirmed at the protein level by Western blot analyses<sup>24</sup>. The *norf1*  
101 mRNA level was found to increase dramatically after the transfer of cultures into  
102 darkness<sup>22</sup>. Darkness-stimulated gene expression is very unusual in cyanobacteria  
103 that base their physiology on light-dependent oxygenic photosynthesis. In  
104 *Synechocystis* 6803, only 62 out of a total of 4,091 experimentally defined  
105 transcriptional units exhibited maximum expression in the dark<sup>22</sup>. Therefore, it  
106 appeared elusive why a free-standing gene encoding a small protein of just 48 amino  
107 acids would be regulated in this way and make its transcript the mRNA with the  
108 highest absolute read count after 12 h in darkness<sup>22</sup>.

109 To elucidate Norf1 function, we scrutinized its expression here in more detail,  
110 investigated mutant strains and identified interacting proteins. Norf1 is a soluble  
111 protein, but membrane fractionation experiments and fusions to GFP showed  
112 targeting to the thylakoid membrane. Immunoprecipitation followed by mass  
113 spectrometry and far Western blot suggested specific interactions with subunits of  
114 the ATP synthase complex. Finally, measurements of ATP hydrolysis in isolated  
115 membrane fractions, and purified ATP synthase complexes revealed that Norf1 is  
116 recruited during unfavorable conditions as an inhibitory subunit that prevents the  
117 hydrolysis of ATP. These findings prompted us to rename Norf1 and its gene to Atp $\Theta$   
118 for the cyanobacterial ATP synthase inhibiTory factor (gene *atpT*).

119

## 120 Results

### 121 Genes encoding homologs of Atp $\Theta$ are widely distributed throughout the 122 cyanobacterial phylum

123 The 48 amino acid sequence of the previously identified *Synechocystis* 6803 Norf1  
124 protein<sup>24</sup>, here renamed Atp $\Theta$ , was used to search for homologs, resulting in the  
125 identification of homologs in 318 available cyanobacterial genomes, including all  
126 finished genomes and some of the permanent draft genomes (**Figure 1**). The  
127 occurrence, sequence and predicted isoelectric points of Atp $\Theta$  homologs are given in  
128 **Table S1**. These homologs were predicted based on quite short amino acid  
129 sequences; therefore, we cannot rule out that the list includes some false positives or  
130 that some homologs might have been missed. While most cyanobacterial genomes  
131 (228/318) possess a single *atpT* gene, we also identified 88 genomes with two and  
132 two genomes with three putative homologs (**Figure S1A**). Putative *atpT* homologs  
133 were not detected outside the cyanobacterial phylum, but homologs were found in  
134 two *Gloeobacter* species considered to represent the most ancestral clade<sup>25</sup>, pointing  
135 at an early and stable acquisition of *atpT* in the cyanobacterial radiation (**Figure 1**).  
136 Most of the genomes containing two homologs are relatively large (median 6.23 Mb)  
137 and belong mainly to the genera *Fischerella*, *Calothrix*, *Scytonema* and *Nostoc*. The  
138 different copies in one strain are not identical, making their origin from recent gene  
139 duplications unlikely. The majority of the putative homologs are between 39 and 70  
140 amino acids in length (**Figure S1B**), except those in *Halomicronema hongdechloris*  
141 C2206 and *Pseudanabaena* sp. PCC 7367 with 94 and 82 amino acids, respectively.  
142 However, the homolog in *Pseudanabaena* sp. PCC 7367 exhibits pronounced  
143 sequence similarity only within its central and C-terminal residues, potentially being

144 translated from an internal start codon (marked in **Table S1** in red) and yielding a  
145 peptide of 51 residues.

146 Atp $\Theta$  homologs are predicted to be soluble proteins lacking transmembrane helices.  
147 Sequence comparison of selected Atp $\Theta$  homologs covering strains from all identified  
148 larger phylogenetic clusters among cyanobacteria showed quite different sequences,  
149 with only 7 widely conserved residues (**Figure S1C**). These residues include  
150 aromatic residues at positions 13 and 22, negatively charged residues at positions 16  
151 and 27 and a conserved proline at position 30 with regard to the *Synechocystis* 6803  
152 protein. This divergence is also reflected in the isoelectric points (IPs), which were  
153 predicted to range from acidic values (Atp $\Theta$  in *Synechocystis* 6803 and *Microcystis*)  
154 to very alkaline values (>11) for Atp $\Theta$  from thermophilic strains (**Table S1**).

155

### 156 **Energy supply and proton gradient integrity impact *atpT* transcription**

157 Northern blot experiments showed that the *atpT* transcript level increased within 10  
158 min after transfer to darkness, rapidly reaching maximum values 30 min after transfer  
159 and declined only marginally at the latest time point (**Figure 2A**). The addition of 10  
160 mM glucose neutralized the strong darkness-induced activation of gene expression  
161 (**Figure 2A**), suggesting that the stimulation of *atpT* transcript accumulation in the  
162 dark is connected to the energy supply for respiration. Based on these results, we  
163 chose an incubation time of 6 h in darkness for subsequent experiments. High *atpT*  
164 expression was also previously associated with transfer to darkness or low light  
165 conditions, entering stationary phase or heat shock<sup>22,24</sup>. We reasoned that all these  
166 conditions compromise photosynthetic activity and may affect the cellular redox  
167 status. Therefore, we tested additional conditions that interfere with the proton  
168 gradient or the electron transfer chain. Indeed, the parallel presence of the uncoupler

169 carbonyl cyanide *m*-chlorophenyl hydrazone (CCCP)<sup>26</sup> or of the electron transport  
170 inhibitor 2,5-dibromo-3-methyl-6-isopropyl-*p*-benzoquinone (DBMIB)<sup>27</sup> restored the  
171 high transcript accumulation in the dark despite the addition of glucose (**Figure 2B**).  
172 These results indicated that it was not the lack of light *per se* that triggered *atpT*  
173 expression. Instead, the enhanced respiration fostered by the addition of glucose led  
174 to the suppression of the dark-induced increase in transcript accumulation, while  
175 CCCP or DBMIB lifted this suppression. We conclude that it was the potentially low  
176 capacity for ATP synthesis due to a diminished or absent proton gradient that  
177 triggered high *atpT* expression.

178 To evaluate the accumulation of the Atp $\Theta$  protein, a specific antibody was  
179 raised that detected a faint band with an apparent molecular mass of 8 kDa in  
180 samples from *Synechocystis* 6803 wild-type cultures grown in the dark but not in the  
181 light (**Figure 2C**). Expression of Atp $\Theta$  under the control of its native promoter from  
182 plasmid vector pVZ322 enhanced the detected band more than twofold, caused by  
183 the higher copy number of the plasmid-located gene. Western blot analysis also  
184 showed that Atp $\Theta$  started to accumulate 0.5 h after transfer to darkness and  
185 continued to become more abundant over a time period of 4 h, after which it  
186 remained at approximately the same level; transfer of the cultures back into light led  
187 to the disappearance of the Atp $\Theta$  signal within less than 4 h (**Figure 2D**). Thus, the  
188 time course of Atp $\Theta$  protein accumulation after transfer of cultures into darkness  
189 closely followed the time course of mRNA accumulation.

190 The inducibility by transfer into darkness might be characteristic of *atpT*  
191 expression and might support the identification of putative homologs in different  
192 species. We chose four species that are phylogenetically distant from *Synechocystis*  
193 6803 (**Figure 1**). *Gloeobacter violaceus* PCC 7421 represents an early-branching



194 species that lacks thylakoid membranes<sup>28</sup>. *Thermosynechococcus elongatus* BP-1  
195 belongs to a clade of unicellular thermophilic strains, while *Prochlorococcus* sp.  
196 MED4 is a laboratory isolate representing the vast marine picocyanobacterial genus  
197 *Prochlorococcus*<sup>29</sup>. Finally, *Nostoc* sp. PCC 7120 (*Nostoc* 7120) is a model strain for  
198 the group of heterocyst-differentiating and N<sub>2</sub>-fixing multicellular cyanobacteria. The  
199 predicted AtpΘ homologs share as little as 12.5% (*Prochlorococcus* sp. MED4), 20.8%  
200 (*G. violaceus* PCC 7421), 33.3 and 41.4% (*T. elongatus* BP-1 and *Nostoc* 7120)  
201 identical amino acids with the *Synechocystis* 6803 protein. The results of Northern  
202 hybridizations showed that the predicted *atpT* homologs in all four strains were  
203 expressed at higher levels after 6 h in darkness than under light conditions (**Figures**  
204 **2E** and **2f**). These findings reinforced the idea that these genes, identified only on the  
205 basis of sequence searches, might be orthologs of the *atpT* gene in *Synechocystis*  
206 6803. The more detailed time course in the case of *Nostoc* 7120 showed an initial  
207 induction within 15 min and reached a maximum 45 min after transfer to darkness  
208 followed by a slight decline in signal intensity over 6 h (**Figure 2F**).

209

## 210 **AtpΘ localizes in *Synechocystis* 6803 to soluble and membrane-enriched** 211 **protein fractions**

212 Strain P<sub>*atpT*</sub>::*atpT*-3xFLAG was used to localize AtpΘ within soluble or membrane-  
213 enriched protein fractions. To verify the specificity of the Flag antibody, we also  
214 analyzed strains P<sub>*atpT*</sub>::*atpT* (negative control) and P<sub>*petJ*</sub>::3xFLAG-*sfgfp* (positive  
215 control). *Synechocystis* 6803 extracts from dark- and light-grown cultures were  
216 separated by centrifugation into membrane and soluble fractions and analyzed by  
217 Western blotting. FLAG-tagged proteins were detected in the respective lysates,  
218 while no signal was obtained for the negative control. AtpΘ was partitioned

219 approximately equally between the soluble and membrane fractions, while FLAG-  
220 tagged sfGFP was restricted to the soluble fraction (**Figure 3A**). The FLAG tag  
221 stabilized the Atp $\Theta$  protein, since the FLAG-tagged version could be detected in  
222 samples from cultures kept under continuous light for 12 h, very different from the  
223 native form (**Figures 2C** and **2D**). We conclude that Atp $\Theta$  can associate with  
224 membranes despite the absence of a predicted membrane-spanning region.

225

### 226 **Fusions to Atp $\Theta$ target GFP to the cyanobacterial thylakoid membrane**

227 According to the fractionation analysis in *Synechocystis* 6803, Atp $\Theta$  localizes to  
228 soluble and membrane-enriched protein fractions, but it remained unclear if only to  
229 the thylakoids, the cellular inner or outer membrane, or several of them. To obtain  
230 insight into the possible subcellular localization of Atp $\Theta$ , we chose *Nostoc* 7120  
231 because of its much larger cells than *Synechocystis* 6803. TblastN analyses  
232 indicated the presence of a single possible *atpT* homolog in a chromosomal region to  
233 which a transcriptional start site was previously assigned at position 2982087r<sup>30</sup>.  
234 Northern hybridization showed a transcript originating from this region (**Figure 2F**),  
235 consistent with the length of 316 nt predicted for this gene from the TSS to the end of  
236 a Rho-independent terminator<sup>31</sup>. The corresponding gene was classified as protein-  
237 coding<sup>31</sup> based on analysis by the RNAcode algorithm<sup>32</sup>. Upon shifting the cultures to  
238 darkness, this mRNA was rapidly induced (**Figure 2F**), similar to the regulation of the  
239 *atpT* gene in *Synechocystis* 6803 and three other cyanobacteria. Next, two  
240 constructs were prepared: pSAM342 harboring the *atpT* promoter, the corresponding  
241 5'UTR plus the coding sequence for the green fluorescent protein (GFP) and  
242 pSAM344 harboring the *atpT* promoter, the 5'UTR, and the *atpT* coding region  
243 translationally fused to GFP (**Table S2**).

244           These constructs were introduced into plasmid  $\alpha$  of *Nostoc* 7120 by  
245 homologous recombination. Confocal microscopy revealed GFP fluorescence in the  
246 recombinant strains obtained but not in a strain bearing a *gfp*-less control construct  
247 (**Figure 3B**). However, we noticed a distinct difference in the intracellular localization  
248 of the signal. The fluorescence of the cells expressing the transcriptional fusion from  
249 construct pSAM342 appeared distributed throughout the cytoplasm, i.e., typical for a  
250 soluble protein such as GFP (**Figure 3C**). In contrast, the fluorescence of the  
251 translational fusion pSAM344 was localized differently and appeared spatially  
252 associated with the thylakoid membrane system, indicated by the overlap between  
253 chlorophyll and GFP fluorescence signals (**Figure 3D**). We conclude that  
254 translational fusions between *atpT* and *gfp* were translated well and that the Atp $\Theta$   
255 sequence was competent to direct GFP to the thylakoid membrane. This localization  
256 is consistent with the association of soluble Atp $\Theta$  with a thylakoid membrane-bound  
257 complex.

258           Interestingly, for both constructs, the signal was very low in those cells that  
259 exhibited no chlorophyll fluorescence (compare **Figure 3B** with **Figures 3C** and **3D**).  
260 These cells were heterocysts specialized for nitrogen fixation, the assimilation of  
261 nitrogen from dinitrogen gas, N<sub>2</sub>, through the enzyme nitrogenase. This result  
262 provided evidence that the *atpT* promoter was switched off cell type-specifically in  
263 heterocysts.

264

## 265 **ATP synthase subunits become enriched in coimmunoprecipitation** 266 **experiments**

267 To identify the function of Atp $\Theta$ , protein coimmunoprecipitation assays followed by  
268 mass spectrometry were conducted with protein extracts from *Synechocystis* 6803

269 cells expressing FLAG-tagged Atp $\Theta$  under the control of its native promoter (strain  
270  $P_{atpT}::atpT$ -3xFLAG). As controls, a strain expressing untagged Atp $\Theta$  under control of  
271 the native promoter (strain  $P_{atpT}::atpT$ ) and a strain expressing FLAG-tagged sfGFP  
272 controlled by the copper-regulated  $P_{petJ}$  promoter (strain  $P_{petJ}::3xFLAG$ -sfGFP) were  
273 used.

274 The evaluation of pull-down experiments via mass spectrometry showed that  
275 34 proteins, including eight subunits of  $F_0F_1$  ATP synthase, were enriched with a  
276  $\log_2FC > 3.5$  among the proteins copurified with FLAG-tagged Atp $\Theta$  compared to at  
277 least one of the two controls (**Table S4**). These results pointed at a possible  
278 interaction between Atp $\Theta$  and one or several subunits of the  $F_0F_1$  ATP synthase  
279 complex.

280 Two experiments were performed to verify this possibility. We performed a  
281 second immunoprecipitation assay comparing FLAG-tagged Atp $\Theta$  and FLAG-tagged  
282 sfGFP in three biological replicates each. The eluted samples were subjected to  
283 SDS-PAGE (**Figure S2**) and then analyzed using mass spectrometry. This analysis  
284 detected the same eight subunits of ATP synthase that were significantly enriched by  
285 coimmunoprecipitation with Atp $\Theta$ -3xFLAG (**Figure 4A**, marked in red), confirming the  
286 specific interaction between Atp $\Theta$  and the ATP synthase complex. Hence, in both  
287 analyses, the same 8 of the 9 known ATP synthase subunits were identified (**Tables**  
288 **S4** and **S5**). The only missing subunit was subunit c, the small membrane-intrinsic  
289 subunit, which appears to be difficult to detect by mass spectrometry. A small  
290 number of additional proteins significantly enriched by coimmunoprecipitation with  
291 Atp $\Theta$ -3xFLAG included two subunits of NAD(P)H-quinone oxidoreductase (subunit I  
292 and subunit O), two proteins of the CmpABCD transporter (CmpC and CmpA), and  
293 the bicarbonate transporter SbtA (**Figure 4B**), pointing at possible higher-order

294 structures or additional binding partners of Atp $\Theta$ . The hierarchical clustering of Atp $\Theta$ -  
295 3xFLAG-enriched proteins labeled in **Figures 4A** and **4B**, as well as 3xFLAG-sfGFP  
296 is shown in **Figure 4C**. The resulting heat map further helped to visualize the  
297 enrichment of each protein, and the blank region under the 3xFLAG-sfGFP cluster  
298 indicates that no such proteins were identified. The complete dataset of the two  
299 independent coimmunoprecipitation assays can be obtained from the PRIDE partner  
300 repository (dataset identifiers PXD020126 and PXD024905).

301 As a further control experiment, we tested the enrichment of AtpB (subunit  
302 beta of ATP synthase) in an eluate from the pull-down experiment with FLAG-tagged  
303 Atp $\Theta$  by Western blotting. AtpB was clearly detected in this eluate but not in the  
304 eluate from the immunoprecipitation of 3xFLAG-sfGFP or a mock experiment with  
305 untagged Atp $\Theta$  (**Figure 4D**). Collectively, these results supported an interaction  
306 between Atp $\Theta$  and subunit(s) of the ATP synthase complex. Moreover, this  
307 interaction would explain the association of Atp $\Theta$  with thylakoid membranes as was  
308 observed in **Figure 3**.

309

### 310 **Impact of Atp $\Theta$ on ATP synthase activity**

311 The results in **Figure 3** showed that Atp $\Theta$  associates with thylakoid  
312 membranes and the results in **Figure 4** that it is the ATP synthase complex it is  
313 interacting with. To test its functional impact, the *atpT* gene was replaced by a  
314 chloramphenicol resistance cassette and biochemical measurements of ATPase  
315 activity were performed. Membrane fractions were isolated from both the wild type  
316 and the fully segregated *atpT* knockout strain (**Figure S1D**), which had been kept in  
317 continuous light or dark, and their ATP hydrolysis activities were analyzed. The  
318 results (**Figure 5A**) showed that the membrane fraction of wild-type *Synechocystis*

319 6803 grown in the light had a significantly higher ATPase activity than the membrane  
320 fraction isolated after 24 h of darkness incubation. In contrast, the membrane  
321 preparation from the knockout strain without Atp $\Theta$  showed no significant difference  
322 between the light- and dark-incubated conditions. These results suggested an *in vivo*  
323 inhibitory effect of Atp $\Theta$  on ATPase activity under darkness.

324 Similar findings were observed in a second cyanobacterium,  
325 *Thermosynechococcus elongatus* BP-1, where the ATPase activities of the  
326 membrane samples prepared from light-cultivated cells were significantly higher than  
327 the ATPase activities of the membrane samples from dark-incubated cells (**Figure**  
328 **S3**). Thus, the predicted Atp $\Theta$  homolog of *Thermosynechococcus elongatus* BP-1  
329 could function similarly to Atp $\Theta$  of *Synechocystis* 6803.

330 To further characterize the potential inhibitory effect of Atp $\Theta$ , the ATP  
331 hydrolysis activity of the membrane fraction from wild-type *Synechocystis* 6803 cells  
332 was measured in the presence of different amounts of an Atp $\Theta$  synthetic peptide  
333 (**Figure 5B**). The synthetic peptide AcnSP<sup>33</sup>, which is of a length similar to Atp $\Theta$  and  
334 was synthesized by the same company, was used as negative control. In parallel, the  
335 well-established F<sub>0</sub>F<sub>1</sub> ATP synthase inhibitor DCCD served as positive control. As  
336 shown in **Figure 5B**, Atp $\Theta$  reduced ATPase activity in a dose-dependent manner,  
337 and the inhibitory effect was saturated at 20 nmol Atp $\Theta$ , whereas the AcnSP peptide  
338 showed no effect on ATPase activity. High amounts of DCCD inhibited ATPase  
339 activity at a level similar to the Atp $\Theta$  peptide. Finally, the combination of DCCD and  
340 Atp $\Theta$  peptide yielded an ATPase inhibition similar to their separate addition. These  
341 results indicated that Atp $\Theta$  is a strong inhibitor of the ATP hydrolysis activity of F<sub>0</sub>F<sub>1</sub>  
342 ATP synthase, comparable to DCCD. The remaining 60% ATP hydrolysis activity of  
343 the membrane preparations probably resulted from other ATP hydrolases, such as

344 H<sup>+</sup>-translocating P-type ATPases that are resistant to DCCD or PilT1 and PilB1  
345 proteins providing energy for the type IV pili system<sup>34,35</sup>, or because either AtpΘ or  
346 DCCD cannot fully inhibit ATPase activity. Then, to further confirm whether the  
347 difference between wild type and knockout cells observed in **Figure 5A** was due to  
348 the lack of AtpΘ, 20 nmol of AtpΘ or AcnSP peptides was supplemented to the  
349 membrane isolated from the dark-incubated knockout strain. The results showed that  
350 supplementation with AtpΘ could significantly inhibit the ATPase activity of the  
351 membrane, while AcnSP showed no such effects (**Figure 5C**), further confirming the  
352 inhibitory role of AtpΘ.

353 To identify the minimal inhibitory sequence of AtpΘ and to study the effects of  
354 specific amino acids on the ATPase inhibitory effect of AtpΘ, four mutant AtpΘ  
355 peptides were designed and synthesized (**Figure S4**). The inhibitory effects of these  
356 peptides on ATPase activity were tested and compared to the inhibitory effects of the  
357 original AtpΘ peptide (**Figure 5D**). Interestingly, the N-terminal part of AtpΘ, which  
358 corresponds to the alpha-helical part of this protein (peptide AtpΘ\_N in **Figure 5D**  
359 and **Figure S4**), exhibited an inhibitory effect similar to the entire peptide. In contrast,  
360 the central part of AtpΘ (AtpΘ\_C in **Figure 5D** and **Figure S4**) showed weaker  
361 inhibitory effects. Introduction of two conserved amino acid substitutions (D26E and  
362 D27E) yielded AtpΘ\_EE, as shown in **Figure 5D** and **Figure S4**. Consistent with the  
363 conservative replacement of two acidic residues by two others, a similar inhibitory  
364 effect on ATP hydrolysis activity was observed as for the native AtpΘ protein. In  
365 contrast, the introduction of a single histidine residue at this position (E27H; AtpΘ\_H  
366 in **Figure 5D** and **Figure S4**) led to an almost complete loss of the inhibitory effect,  
367 indicating that the negative charge at this position is important for the inhibitory  
368 activity of the full-length AtpΘ peptide. The 3D structure modeling of AtpΘ using



369 PEP-FOLD3<sup>36</sup> predicted an N-terminal alpha helix and a C-terminal random structure,  
370 which was also observed in the predicted structures of representative Atp $\Theta$   
371 homologs from cyanobacteria strains with one, two or three putative homologs  
372 (**Figure S5**). These results suggest that the N-terminal alpha helix of Atp $\Theta$  is a  
373 conserved structural element that is together with the cluster of centrally located,  
374 negatively charged amino acids responsible for the inhibition of ATPase activity.

375

### 376 **F<sub>0</sub>F<sub>1</sub> ATP synthase purification and the effect of Atp $\Theta$**

377 To rule out the effects of membrane proteins other than ATP synthase, ATP synthase  
378 was purified from *Synechocystis* 6803 cells by fusing a 3xFLAG tag to the C-terminus  
379 of AtpB. The purified protein was first characterized by SDS-PAGE, showing good  
380 purity and distribution of different subunits (**Figure 6A**), and then probed using anti-  
381 FLAG and anti-AtpB antisera (**Figures 6B** and **6C**, respectively), confirming the  
382 presence of both 3xFLAG and AtpB. The ATPase activity of the purified ATP  
383 synthase was then measured directly or in the presence of different inhibitors (**Figure**  
384 **6D**). ATP hydrolysis activity was detected using the purified protein complex.  
385 Compared with the purified complex, the addition of AcnSP peptide yielded no  
386 significant changes, whereas the addition of Atp $\Theta$  peptide or DCCD significantly  
387 decreased the ATPase activity. The inhibitory effect of Atp $\Theta$  appeared stronger than  
388 the inhibitory effect of DCCD, and the combination of both showed no additive effects.  
389 These results further confirmed the inhibitory effect of the Atp $\Theta$  peptide on the  
390 hydrolytic activity of ATP synthase.

391



392 **Far Western blot identifies interaction partners of Atp $\Theta$  from purified ATP**  
393 **synthase**

394 To gain further insight into the interaction between Atp $\Theta$  and the ATP synthase  
395 complex, a far Western blot approach<sup>37</sup> was applied. In this approach, proteins were  
396 renatured after blotting onto a membrane and served as baits. The membrane was  
397 then incubated with the synthetic Atp $\Theta$  peptide, followed by anti-Atp $\Theta$  serum and  
398 anti-rabbit IgG antiserum. As shown in **Figure 7**, Atp $\Theta$  was enriched mainly at two  
399 positions, which were assigned as subunit a (*atpB*, Sll1322) and subunit c (*atpE*,  
400 Ssl2615), respectively, based on the comparison to the subunit distribution of *E. coli*  
401 F<sub>0</sub>F<sub>1</sub> ATP synthase<sup>38</sup>. A very weak signal of approximately 50 kDa size was also  
402 observed, which should correspond to subunit alpha or subunit beta (**Figure 7C**).  
403 Although the 50 kDa signal was relatively weak, it was reproducibly observed (n = 3)  
404 and should therefore also be considered. As a negative control, a mock far Western  
405 blot was conducted in which TBST buffer was used instead of the synthetic Atp $\Theta$   
406 peptide. In this setting, no signal was observed for the two replicates of ATP  
407 synthase purification, while the positive controls could be detected (**Figure S6**),  
408 suggesting that none of the signals observed in **Figure 7** were due to unspecific  
409 interaction with any of the antisera used. These results further confirmed the specific  
410 interaction of the Atp $\Theta$  peptide with distinct subunits of ATP synthase.

411

412 **Discussion**

413 F<sub>0</sub>F<sub>1</sub>-type ATP synthases produce ATP via chemiosmotic coupling to a proton  
414 gradient. However, while ATP synthases preferentially catalyze ATP formation, a  
415 weaker or temporarily missing proton gradient can stimulate the reverse reaction,  
416 pumping protons while hydrolyzing ATP. In the mitochondria of yeast and mammals,

417 small inhibitory peptides can prevent ATP synthase from running backwards, hence  
418 avoiding wasteful ATP hydrolysis. In plant chloroplasts, in which the proton gradient  
419 is generated by light-driven photosynthetic electron transport, a redox-controlled  
420 mechanism switches ATP synthase activity off at night when photosynthesis does not  
421 take place<sup>1</sup>. In this respect, cyanobacteria present an interesting case because  
422 photosynthetic ATP synthesis is light-driven, as in chloroplasts, but conditions can  
423 easily be envisioned where inhibition of ATP hydrolysis is warranted. Such conditions  
424 can be low light, darkness and others that would affect the strength of the proton  
425 gradient. Cellular ATP demand is likely considerably lower under certain conditions,  
426 e.g., during the night, but in contrast to chloroplasts, residual activity should be  
427 maintained in cyanobacteria to allow respiration to proceed with ATP synthesis,  
428 which uses the same ATP synthase that is also used for photosynthesis in the  
429 thylakoid membrane system.

430 Several mechanisms have been identified for regulating ATP synthase activity  
431 in cyanobacteria (**Figure S7**). A common regulatory mechanism, the ADP-mediated  
432 inhibition of the  $F_1$  part, has been reported for cyanobacterial ATPase<sup>20</sup>. Although the  
433  $\gamma$  subunit of cyanobacteria is not redox-sensitive compared to the chloroplast  $F_0F_1$   
434 ATP synthase subunit  $\gamma$ , the ADP-mediated inhibition of ATPase was assigned to this  
435 subunit<sup>20</sup>. Another well-characterized mechanism is the inhibition of the rotation of  
436 bacterial  $F_0F_1$  ATP synthase via the  $\epsilon$  subunit, called  $\epsilon$  inhibition<sup>39</sup>.  $\epsilon$  inhibition in  
437 cyanobacteria was reported to be ATP-independent, different from other bacteria,  
438 and was related to the distinct  $\gamma$  subunit of cyanobacteria as well<sup>40</sup>. In addition, both  
439 the  $\gamma$  and  $\epsilon$  subunits of cyanobacterial  $F_0F_1$  ATP synthase were reported to be  
440 important for the dark acclimation of cyanobacteria<sup>21</sup>. However, many aspects of the  
441 regulation of cyanobacterial  $F_0F_1$  ATP synthase have remained unknown.

442 In the present study, we suggest that the small protein Atp $\theta$  represents a  
443 functional analog in cyanobacteria of the small inhibitory peptides that arrest ATP  
444 synthase from running backwards in mitochondria. This hypothesis is supported by  
445 several lines of evidence. First, the direct interaction of Atp $\theta$  with ATP-synthase  
446 subunits has been shown in different protein/protein interaction studies, where it  
447 showed the strongest binding toward subunit a (*atpB*, Sll1322) and subunit c (*atpE*,  
448 Ssl2615) (**Figure 7**). Second, Atp $\theta$  supplementation had a specific, dose-dependent  
449 negative impact on ATP hydrolysis activity in isolated membrane fractions or using  
450 the purified ATP synthase complex. The extent of this inhibition was similar to the  
451 inhibition exerted by specific ATP synthase inhibitors, consistent with its role in  
452 preventing the reverse reaction, i.e., the wasting of ATP via hydrolysis when the  
453 proton gradient is weakened. The addition of synthetic Atp $\theta$  peptide to the membrane  
454 samples prepared from *Synechocystis* 6803 cultured in the presence of light yielded  
455 a maximum 35% inhibition of ATPase activity (**Figure 5B**). A slightly higher inhibitory  
456 effect of 40% was achieved if Atp $\theta$  peptide was added to the preparations of purified  
457 ATP synthase (**Figure 6D**). These findings indicate that the Atp $\theta$  peptide may inhibit  
458 up to 40% of the ATPase activity in ATP synthase. Third, investigations of wild type  
459 and *atpT* mutant strains are consistent with the *in vitro* ATP synthase activity tests.  
460 While the membrane sample prepared from *Synechocystis* 6803 cultured under  
461 continuous light showed a similar ATPase activity as previously reported<sup>21</sup>, the  
462 membrane samples prepared from dark-incubated *Synechocystis* 6803 with  
463 maximum *atpT* expression showed an ATPase activity of approximately 85% (**Figure**  
464 **5A**), and this difference was not observed in the *atpT* knock-out mutant of  
465 *Synechocystis* 6803, indicating that the Atp $\theta$  protein is required *in vivo* to decrease  
466 ATPase activity during dark incubation. Fourth, the expression data suggest that the

467 Atp $\Theta$  action is controlled mostly via the regulation of its expression because the  
468 protein seems to have a low stability. Its expression is particularly stimulated under  
469 conditions that could weaken the transmembrane proton gradient, such as darkness,  
470 or, in our experiments, by the addition of the uncoupler CCCP or the electron chain  
471 inhibitor DBMIB (**Figure 2B**). While CCCP is a well-established protonophore,  
472 DBMIB is better known as an inhibitor of photosynthetic electron transfer. However,  
473 DBMIB affects the cytochrome *b<sub>6</sub>f* complex<sup>27</sup>, which is shared by photosynthetic and  
474 respiratory electron transfer that operates in the same membrane system in  
475 cyanobacteria. In contrast, the presence of Atp $\Theta$  might be futile when ATP synthase  
476 runs at high speed, such as under high-light conditions driven by an efficient  
477 photosynthetic light reaction or in the presence of high rates of respiration.  
478 Consistently, *atpT* dark induction could largely be prevented by the addition of  
479 glucose (**Figure 2A**), likely due to the stimulation of respiration-dependent ATP  
480 synthesis in the presence of glucose. Furthermore, such a scenario of high  
481 respiration exists in heterocysts, which have no photosystem II but exhibit substantial  
482 ATP production to meet the high demand of nitrogen-fixing nitrogenase, linked to  
483 high rates of respiration consuming the O<sub>2</sub> inside the heterocysts. Indeed, we  
484 observed that the expression of the *atpT* promoter was shut down in heterocysts of  
485 *Nostoc* 7120 (**Figure 3C** and **3D**). Finally, the cross-phylum importance of the Atp $\Theta$ -  
486 mediated prevention of the backward reaction of ATP synthase is supported by its  
487 ubiquitous occurrence throughout the cyanobacterial phylum and our finding that  
488 *atpT* expression was stimulated under conditions leading to lowered thylakoid proton  
489 gradients in several divergent species of cyanobacteria (**Figure 2E** and **2F**). These  
490 results make it very likely that the conclusions obtained with the model *Synechocystis*  
491 6803 can also be generalized for other cyanobacteria.

492 Collectively, these data provide evidence that the small protein Atp $\Theta$  acts as  
493 an ATP hydrolysis inhibitor of cyanobacterial ATP synthase. This role of Atp $\Theta$   
494 represents an interesting analogy to the ATP synthase regulator IF1 in the  
495 mitochondria of eukaryotes. However, unlike IF1, which binds the catalytic interface  
496 between the  $\alpha$  and  $\beta$  subunits<sup>41</sup>, the main potential interaction partners of Atp $\Theta$ ,  
497 subunits a and c, belong to the F<sub>0</sub> part of ATP synthase, which resides within the  
498 thylakoid membrane (**Figure S7**). Therefore, the binding of Atp $\Theta$  to these two  
499 topographically close subunits points to a possibly divergent mechanism of Atp $\Theta$   
500 function by hindering the rotation of the ATP synthase complex through direct binding.

501

## 502 **Materials and Methods**

### 503 **Strains and growth conditions**

504 Wild-type *Synechocystis* 6803 and mutant strains were cultured photoautotrophically  
505 in TES-buffered (20 mM, pH 8.0) BG11 medium<sup>42</sup> with gentle agitation or on agar-  
506 solidified (1.5% Kobe I agar) plates under constant illumination with white light of  
507 approximately 40  $\mu\text{mol photons m}^{-2} \text{s}^{-1}$  at 30°C and supplemented with appropriate  
508 antibiotics (5  $\mu\text{g/mL}$  gentamicin, 10  $\mu\text{g/mL}$  kanamycin, and 3  $\mu\text{g/mL}$  chloramphenicol).  
509 For incubation in darkness, flasks were wrapped with aluminum foil. CuSO<sub>4</sub> (2  $\mu\text{M}$ )  
510 was used to induce the expression of the Cu<sup>2+</sup>-responsive *petE* promoter<sup>43</sup>, while the  
511 *petJ* promoter was induced by removing Cu<sup>2+</sup> from the medium through centrifugation  
512 and resuspension. For high-density cultivation used for ATP synthase purification,  
513 *Synechocystis* 6803 overexpressing P<sub>*petE*</sub>-*atpB*-3xFLAG was cultured in the cell-DEG  
514 system as reported previously<sup>44</sup> using freshwater medium<sup>45</sup> with the following  
515 modifications: Na<sub>2</sub>EDTA and CuSO<sub>4</sub> were not included in the medium, and 10  $\mu\text{g/mL}$   
516 kanamycin or 5  $\mu\text{g/mL}$  gentamicin was added.

517 Cultures of *Nostoc* 7120 were bubbled with an air/CO<sub>2</sub> mixture (1% v/v) and  
518 grown photoautotrophically at 30°C in BG11 medium<sup>42</sup>. Darkness was implemented  
519 on air-CO<sub>2</sub>-bubbled cultures by covering with aluminum foil plus black velvet. The  
520 thermophilic cyanobacterium *Thermosynechococcus elongatus* BP-1 was cultured in  
521 BG11 medium under continuous illumination with 30 μmol photons m<sup>-2</sup> s<sup>-1</sup> white light  
522 (Master LED tube Universal 1200 mm UO 16 W830 T8; Philips) at 45°C. *Gloeobacter*  
523 *violaceus* PCC 7421 was cultivated photoautotrophically in Allen's medium<sup>46</sup> in  
524 Erlenmeyer flasks under continuous white light (4 μmol photons m<sup>-2</sup> s<sup>-1</sup>) at 20°C with  
525 shaking. *Prochlorococcus* MED4 cells were grown at 22°C in AMP1 medium<sup>47</sup> under  
526 30 μmol photons m<sup>-2</sup> s<sup>-1</sup> continuous white cool light and harvested in an exponential  
527 growth phase.

528 To delete the *atpT* gene from *Synechocystis* 6803 (genome position 3274499  
529 to 3274645, reverse strand), the flanking regions of *atpT* were amplified by primer  
530 pairs AtpTKO-up-F/AtpTCmKO-up-R and AtpTCmKO-down-F/AtpTKO-down-R, and  
531 the resulting fragments were fused with a chloramphenicol resistance cassette and a  
532 pUC19 backbone amplified with primer pairs AtpTKO-vec-F/AtpTKO-vec-R and  
533 CmR-F/CmR-R using AQUA cloning<sup>48</sup>. The resulting plasmid, pUC-atpTKO-CmR,  
534 was then transferred into wild-type *Synechocystis* 6803 by natural transformation.  
535 The transformants were selected on BG11 agar plates supplemented with  
536 chloramphenicol. Complete segregation was achieved after several rounds of  
537 selection.

538 The construction of overexpression strains P<sub>atpT</sub>::*atpT*, P<sub>atpT</sub>::*atpT*-3xFLAG,  
539 and P<sub>petJ</sub>::3xFLAG-*sfgfp* was described previously<sup>24</sup>. P<sub>petE</sub>::*atpB*-3xFLAG, a strain  
540 overexpressing the FLAG-tagged subunit AtpB, was constructed using primer pairs  
541 pUC19-XbaI\_PpetE\_fw/atpB::PpetE\_rev, PpetE::atpB\_fw/3xFlag\_atpB\_rev and

542 *atpB\_3xFlag\_fw/3xFlag\_PstI-pUC19\_rev*. The primers used for mutant construction  
543 are listed in **Table S3**.

544 Construction of *Nostoc* 7120 strains. The strain carrying plasmid pCSEL24  
545 (*gfp-less* control) was constructed previously<sup>49</sup>. To construct pSAM342  
546 (transcriptional fusion of coordinates 2982431 to 2982070 from *Nostoc* 7120, reverse  
547 strand), a PCR fragment was amplified with oligonucleotides 900+901, *Clal-XhoI*-  
548 digested and cloned into *Clal-XhoI*-digested pSAM270<sup>50</sup>. To generate pSAM344  
549 (translational Atp $\theta$ -GFP fusion, coordinates 2982431 to 2981902, reverse strand), a  
550 PCR fragment was amplified with oligonucleotides 900+902, *Clal-EcoRV*-digested  
551 and cloned into *Clal-EcoRV*-digested pSAM147<sup>51</sup> in frame with the *gfpmut2* gene,  
552 rendering pSAM343. The *EcoRI* fragment from pSAM343, containing the fusion  
553 between the *atpT* promoter, the *atpT* gene and the *gfpmut2* gene, was cloned into  
554 *EcoRI*-digested pCSEL24, rendering pSAM344. All plasmids were transferred by  
555 conjugation followed by selection of streptomycin/spectinomycin (5  $\mu$ g/mL each)-  
556 resistant colonies after integration in the alpha megaplasmid.

557

### 558 **Computational sequence analyses**

559 Homologs of the *atpT* gene were searched using the *Synechocystis* 6803 Atp $\theta$  as  
560 query against the IMG<sup>52</sup> and UniProt databases using blastP and against the NCBI  
561 database using both TblastN<sup>53</sup> and blastP<sup>54</sup> at a threshold E value  $\leq 1e^{-5}$ . Multiple  
562 sequence alignments were conducted using Jalview2<sup>55</sup>. Isoelectric points were  
563 predicted by the R package pIR<sup>56</sup>.

564 Phylogenetic analyses were conducted in MEGA X<sup>57</sup> using the maximum  
565 likelihood algorithm based on 16S rRNA sequences extracted from the SILVA



566 database<sup>58</sup> and modified according to Klähn *et al.*<sup>59</sup>. The evolutionary distances were  
567 computed using the maximum composite likelihood method<sup>60</sup>.

568

### 569 **Fluorescence microscopy**

570 Images of *Nostoc* 7120 filaments growing on top of nitrogen-free solid media were  
571 taken five days after plating. The accumulation of GFP was analyzed and quantified  
572 using a Leica TCS SP2 confocal laser scanning microscope as previously  
573 described<sup>61</sup>.

574

### 575 **Protein extraction and Western blots**

576 *Synechocystis* 6803 cells for protein extraction were harvested by centrifugation  
577 (4,000 x g, 10 min, 4°C) and resuspended in PBS buffer (137 mM NaCl, 2.7 mM KCl,  
578 10 mM Na<sub>2</sub>HPO<sub>4</sub>, 1.8 mM KH<sub>2</sub>PO<sub>4</sub>, pH 7.4) containing protease inhibitor cocktail.  
579 Cells were then disrupted mechanically in a Precellys homogenizer (Bertin  
580 Technologies). Glass beads and unbroken cells were removed by centrifugation at  
581 1,000 g for 1 min at 4°C, and the total crude protein was obtained. Before loading,  
582 protein samples were boiled with 1x protein loading buffer at 95°C for 10 min or  
583 incubated at 50°C for 30 min supplemented with 2% SDS if the membrane fraction  
584 was included.

585 For Western blot analysis, proteins were separated either in 15% glycine-SDS  
586 gels or in 16%/6 M urea Tricine-SDS gels. PageRuler Prestained Protein Ladder  
587 (10–170 kDa, Fermentas) or Precision Plus Protein DualXtra (2–250 kDa, Bio-Rad)  
588 was used as a molecular mass marker. The separated proteins were then transferred  
589 to nitrocellulose membranes (Hybond™-ECL, GE Healthcare) by semidry



590 electroblotting. The blotted membrane was then blocked with 3% skimmed milk  
591 dissolved in TBST (20 mM Tris pH 7.6, 150 mM NaCl, 0.1% Tween-20) and  
592 incubated with primary antibody (1:500 dilution for anti-Atp $\Theta$  antiserum and 1:2,000  
593 for anti-AtpB antibody) and secondary antibody (1:10,000 anti-rabbit antibody)  
594 sequentially. The anti-Atp $\Theta$  antiserum was generated by a commercial provider  
595 (Pineda Antikörper-Service). Signals were detected with ECL start Western blotting  
596 detection reagent (GE Healthcare) on a chemiluminescence imager system (Fusion  
597 SL, Vilber Lourmat).

598

### 599 **Isolation of FLAG-tagged proteins and mass spectrometry analysis**

600 For the pull-down assay, 800 mL of *Synechocystis* 6803 culture at an OD<sub>750</sub> of  
601 approximately 1 was harvested by centrifugation at 4,000 g for 30 min at 4°C. Cell  
602 pellets were washed once with prechilled FLAG buffer (50 mM Hepes-NaOH pH 7.0,  
603 5 mM MgCl<sub>2</sub>, 25 mM CaCl<sub>2</sub>, 150 mM NaCl, 10% glycerol, 0.1% Tween-20) and then  
604 resuspended in the same buffer supplemented with protease inhibitor cocktail. The  
605 cell suspension was disrupted with a Precellys homogenizer (Bertin Technologies,  
606 France). All subsequent steps were carried out at 4°C. Total cell extracts and glass  
607 beads were transferred to Bio-Spin® Disposable Chromatography Columns (Bio-  
608 Rad), which were put on centrifugation tubes (Sorvall Instruments). The glass beads  
609 were separated from cellular components by centrifugation (4,000 g, 5 min, 4°C).  
610 Membrane proteins were then solubilized by adding 2% *n*-dodecyl-beta-D-maltoside  
611 ( $\beta$ -DM), followed by dark incubation for 1 h at 4°C with gentle agitation. Nonsoluble  
612 components were removed by centrifugation (25,000 g, 30 min, 4°C), and the  
613 solubilized crude extract (sCE) was transferred to a new tube.

614 FLAG-tagged proteins were purified by column chromatography using ANTI-  
615 FLAG M2 affinity agarose gel or ANTI-FLAG M2 magnetic beads (both from Sigma-  
616 Aldrich) according to the manufacturer's instructions. When ANTI-FLAG M2 affinity  
617 agarose gel was used, the sCE was loaded and passed over the column three times  
618 to improve binding. The column was washed with 5 x 2 mL of FLAG buffer, and the  
619 FLAG-tagged proteins were eluted by incubating the matrix with 1x protein loading  
620 buffer at 50°C for 30 min. The agarose was sedimented by centrifugation (16,000 g,  
621 5 min, RT), and 20 µL of the resulting eluates were loaded on a glycine SDS-PAGE,  
622 which was subsequently stained with Coomassie. Then, each gel lane was cut into  
623 pieces, destained, desiccated and rehydrated in trypsin as previously described<sup>62</sup>. In  
624 gel-digest was incubated at 37 °C overnight and peptides were eluted with water by  
625 sonication for 15 min.

626 Samples were loaded on an EASY-nLC II system (Thermo Fisher Scientific)  
627 equipped with an in-house built 20 cm column (inner diameter 100 µm, outer  
628 diameter 360 µm) filled with ReproSil-Pur 120 C18-AQ reversed-phase material (3  
629 µm particles, Dr. Maisch GmbH). Elution of peptides was achieved with a nonlinear  
630 77 min gradient from 1 to 99% solvent B (0.1% (v/v) acetic acid in acetonitrile) with a  
631 flow rate of 300 nL/min and injected online into an LTQ Orbitrap XL (Thermo Fisher  
632 Scientific). The survey scan at a resolution of R=30,000 and 1 x 10<sup>6</sup> automatic gain  
633 control target in the Orbitrap with activated lock mass correction was followed by  
634 selection of the five most abundant precursor ions for fragmentation. Single charged  
635 ions as well as ions without detected charge states were excluded from MS/MS  
636 analysis. Fragmented ions were dynamically excluded from fragmentation for 30 s.  
637 Database searches with Sorcerer-SEQUEST 4 (Sage-N Research, Milpitas, USA)  
638 were performed against a *Synechocystis* 6803 database downloaded from Uniprot

639 (Proteome-ID UP000001425) on 11/12/20, which was supplemented with common  
640 laboratory contaminants and the sequences of Atp $\ominus$ -3\*FLAG and GFP-3\*FLAG.  
641 After adding reverse entries the final database contained 7,102 entries. Database  
642 searches were based on a strict trypsin digestion with two missed cleavages  
643 permitted. No fixed modifications were considered and oxidation of methionine was  
644 considered as variable modification. The mass tolerance for precursor ions was set  
645 to 10 ppm and the mass tolerance for fragment ions to 0.5 Da. Validation of MS/MS-  
646 based peptide and protein identification was performed with Scaffold V4.8.7  
647 (Proteome Software, Portland, USA), and peptide identifications were accepted if  
648 they exhibited at least deltaCn scores of greater than 0.1 and XCorr scores of greater  
649 than 2.2, 3.3 and 3.75 for doubly, triply and all higher charged peptides, respectively.  
650 Protein identifications were accepted if at least 2 unique peptides were identified.  
651 Thee mass spectrometry proteomics data have been deposited to the  
652 ProteomeXchange Consortium via the PRIDE partner repository<sup>63</sup> with the dataset  
653 identifiers PXD020126 and PXD024905.

654 Volcano plot visualization of the mass spectrometry results was performed  
655 using Perseus (version 1.6.1.3)<sup>64</sup> according to the following procedures.  
656 Contaminants and proteins with less than three valid values in at least one  
657 experimental group (Atp $\theta$ -3xFLAG and 3xFLAG-GFP) were first removed from the  
658 matrix, and the normalized spectrum abundance factor (NSAF) intensities were log<sub>2</sub>-  
659 transformed. Imputation of the missing values was then performed based on the  
660 normal distribution of each column using default settings. Two sample *t* tests were  
661 performed before generating the final volcano plot. A heat map was generated by the  
662 hierarchical clustering function of Perseus 1.6.1.3 with default settings.

663 FLAG-tagged F<sub>0</sub>F<sub>1</sub> ATP synthase was purified from *Synechocystis* 6803  
664 overexpressing P<sub>petE</sub>::*atpB*-3xFLAG using a similar approach with modifications.  
665 *Synechocystis* 6803 overexpressing P<sub>petE</sub>::*atpB*-3xFLAG was cultured in Cu<sup>2+</sup>-free  
666 medium using the cell-DEG system in which much higher optical densities were  
667 obtained<sup>44</sup>. Cu<sup>2+</sup> at 2 μM was added to the system when the OD<sub>750</sub> reached 8.0 to  
668 induce the expression of the *petE* promoter, and the cells were collected by  
669 centrifugation (5,000 g, 10 min, room temperature). Cell pellets were washed once  
670 using prechilled FLAG buffer 2 (FLAG buffer without Tween-20). After disruption  
671 using Precellys (all remaining steps were performed at 4°C unless stated otherwise),  
672 the lysate was centrifuged at 4,000 g for 10 min to remove unbroken cells and beads,  
673 followed by 20,000 g for 1 h to collect the membrane fraction. The membrane fraction  
674 was then resuspended in FLAG buffer 2 supplemented with 1% *n*-dodecyl-beta-D-  
675 maltoside (β-DM) and incubated for 1 h with gentle agitation. Nonsoluble components  
676 were removed by centrifugation (20,000 g, 30 min), and the supernatant was filtered  
677 with a 0.45 μm syringe filter and then subjected to ANTI-FLAG M2 affinity agarose  
678 gel electrophoresis. The resin was prepared according to the manufacturer's  
679 instructions using FLAG buffer 3 (FLAG buffer 2 supplemented with cocktail protease  
680 inhibitor and 0.03% [w/v] β-DM). The column was washed with 5 x 2 mL FLAG buffer  
681 3 and eluted with 1.5 mL FLAG buffer 3 with 150 μg/mL 3xFLAG peptide (Sigma-  
682 Aldrich). The eluates were then concentrated to 200 μl with a 100 kDa MWCO  
683 centrifuge concentrator. The protein concentration was measured using the Bradford  
684 method.

685

## 686 RNA isolation and Northern blot

687 Cyanobacterial cells except those of *Nostoc* 7120 were harvested by vacuum  
688 filtration on hydrophilic polyethersulfone filters (Pall Supor®-800; 0.8 µm for  
689 *Synechocystis* 6803, *Nostoc* 7120, *Thermosynechococcus elongatus* BP-1 and  
690 *Gloeobacter violaceus* PCC 7421, 0.45 µm for *Prochlorococcus* MED4). Total RNA  
691 was then isolated using PGTX<sup>65</sup>. The isolated RNA was mixed with 2x loading buffer  
692 (Ambion) and incubated for 5 min at 65°C. Denatured RNA samples were separated  
693 in a 1.5% agarose gel supplemented with 16% (v/v) formaldehyde and then  
694 transferred to a positively charged nylon membrane (Hybond™-N+, GE Healthcare)  
695 by capillary blotting with 20x SSC buffer (3 M NaCl, 0.3 M sodium acetate, pH 7.0)  
696 overnight.

697 After the RNA was cross-linked to the membrane by UV light (125 mJ), the  
698 membranes were hybridized with specific [<sup>32</sup>P]ATP end-labeled oligonucleotides or [<sup>α</sup>-  
699 <sup>32</sup>P]UTP-labeled single-stranded RNA probes generated by *in-vitro* transcription from  
700 DNA templates using the MAXIscript® T7 In Vitro Transcription Kit (Ambion). The  
701 primers and oligonucleotides used for generating DNA templates are given in **Table**  
702 **S3**. Hybridization in 0.12 M sodium phosphate buffer (pH 7.0), 7% SDS, 50%  
703 deionized formamide and 0.25 M NaCl was performed overnight at 45°C or at 62°C  
704 with labeled oligonucleotide probes or labeled transcript probes, respectively. The  
705 hybridized membrane was then washed using washing solutions I (2xSSC, 1% SDS),  
706 II (1x SSC, 0.5% SDS) and III (0.1x SSC, 0.1% SDS) for 10 min each at 5 degrees  
707 below the hybridization temperature. Total RNA from *Nostoc* 7120 was prepared as  
708 described<sup>66</sup> and separated on 8% urea-acrylamide gels. As a probe, a PCR fragment  
709 was generated as template to label one strand with Taq polymerase using only one  
710 oligonucleotide and [<sup>α-32</sup>P]-dCTP. Signals were visualized using Typhoon FLA 9500

711 (GE Healthcare) or Cyclone Storage Phosphor System (PerkinElmer) and Quantity  
712 One® software (Bio-Rad).

713

#### 714 **Membrane preparation and ATP hydrolysis assay**

715 One liter of *Synechocystis* 6803 or *Thermosynechococcus elongatus* BP-1 cultures  
716 were grown to an OD<sub>750</sub> of approximately 1 and cells were collected by centrifugation  
717 at 6,000 g for 5 min. The pellet was then washed once with precooled buffer A (1.0 M  
718 betaine, 0.4 M d-sorbitol, 20 mM HEPES-NaOH, 15 mM CaCl<sub>2</sub>, 15 mM MgCl<sub>2</sub>, 1 mM  
719 6-amino-*n*-caproic acid, and protease inhibitor cocktail; pH 7.0) and then lysed using  
720 a Precellys homogenizer (steps afterwards were conducted at 4°C). Glass beads and  
721 unbroken cells were removed by centrifugation at 4,000 g for 10 min, and then the  
722 crude membranes were collected by centrifugation at 20,000 g for 1 h. The acquired  
723 membrane pellet was washed twice with buffer A, resuspended and incubated on ice  
724 for at least 1 h. Undissolved components were removed by centrifugation at 4,000 g  
725 for 5 min, and the membrane suspension was quantified by measuring the Chl *a*  
726 concentration at OD<sub>664</sub><sup>67</sup>.

727 The ATPase activity of the membrane was measured via an ATP hydrolysis  
728 coupled enzyme activity assay. Buffer B (10 mM TES, 100 mM KCl, 1 mM MgCl<sub>2</sub>,  
729 and 0.1 mM CaCl<sub>2</sub>; pH 7.5) was supplemented with the indicated amounts of  
730 synthetic peptide or DCCD at room temperature. Then, 1 mM Mg-PEP, 0.175 mM  
731 NADH, 65 U pyruvate kinase (PK) and 82.5 U lactate dehydrogenase (LDH) was  
732 added. Before the activity measurement, 1 mM MgATP (pH 7.5) solution was added  
733 and incubated for 1 min to remove residual ADP. Then, membrane preparations  
734 containing approximately 10 µg Chl *a* were added to each assay, and the OD<sub>340</sub> was  
735 measured immediately and after 10 min of incubation at room temperature using

736 quartz cuvettes. The ATPase activity was calculated accordingly at nmol ATP mg Chl  
737  $a^{-1} \text{ min}^{-1}$ . For the measurement of ATPase activity of the isolated ATP synthase, a  
738 similar method was applied, and 20  $\mu\text{g}$  protein was used for each assay.

739

#### 740 **Far Western blotting**

741 Far Western blotting was performed as described previously<sup>37,68</sup> with modifications.  
742 After electrophoresis, proteins were transferred onto a PVDF membrane. Synthetic  
743 Atp $\Theta$  peptide, anti-Atp $\Theta$  antiserum and anti-rabbit IgG antiserum were used for  
744 incubation sequentially. Milk powder was omitted in the denaturing/renaturing steps  
745 of the blotted membrane as described by Krauspe *et al.*<sup>68</sup>. The membrane with  
746 renatured proteins was first blocked with 5% milk powder in TBS-T and then  
747 incubated with 3  $\mu\text{g}/\text{mL}$  synthetic Atp $\Theta$  peptide at 4°C overnight. Signals were  
748 detected with ECL start Western blotting detection reagent (GE Healthcare) on a  
749 chemiluminescence imager system (Fusion SL, Vilber Lourmat).

750

#### 751 **Statistical analyses**

752 Statistical analyses were performed with GraphPad Prism 6.0 (GraphPad Software,  
753 Inc., San Diego, CA). The ATP hydrolysis activities of membrane fractions isolated  
754 from different strains or conditions were compared using unpaired *t*-test with Welch's  
755 correction (**Figure 5A** and **Figure S3; Tables S6** and **S11**), and those of membranes  
756 isolated from the same strain but with different additives were compared using ratio  
757 paired *t*-test (**Figures 5A, 5B, 5C, 5D** and **Figure 6D; Tables S6, S7, S9** and **S10**).  
758 Differences between groups were considered to be significant at a *P* value of <0.05  
759 and very significant at a *P* value of <0.01.



760

## 761 **Data availability**

762 The datasets produced in this study are available in the following databases:

- 763 • Mass spectrometry raw data were deposited at the ProteomeXchange  
764 Consortium (<http://proteomecentral.proteomexchange.org>) via the PRIDE  
765 partner repository<sup>63</sup> under the identifiers PXD020126 and PXD024905 (Access  
766 for reviewers: for PXD020126, username: [reviewer71867@ebi.ac.uk](mailto:reviewer71867@ebi.ac.uk),  
767 password: DO8cqwaA; for PXD024905, username:  
768 [reviewer\\_pxd024905@ebi.ac.uk](mailto:reviewer_pxd024905@ebi.ac.uk), password: Xyztqe8B).

769 Supplementary information for this article is available online.

770

## 771 **Acknowledgments**

772 This study was funded by the German Research Foundation (DFG) priority program  
773 SPP2002 “Small Proteins in Prokaryotes, an Unexplored World” (grant HE 2544/12-1  
774 to WRH, grant HA 2002/22-1 to MH and grant BE 3869/5-1 to DöB) and by a China  
775 Scholarship Council grant to K.S. We thank the ZBSA proteomics staff, especially  
776 Verónica I. Dumit, for support, Gen Enomoto, for an aliquot of *Thermosynechococcus*  
777 *elongatus* BP1, Mai Watanabe for an aliquot of *Gloeobacter violaceus* PCC 7421 and  
778 Claudia Steglich for a culture of *Prochlorococcus* sp. MED4 (all University of  
779 Freiburg).

780

## 781 **Author contributions**

782 KS and DeB carried out the molecular-genetic and biochemical analyses in  
783 *Synechocystis* 6803, and AMMP performed all experiments in *Nostoc* 7120. SM and  
784 DöB performed proteomics analyses. MH provided scientific input for improving the



785 experimental design and physiological interpretation. WRH designed the study, and  
786 all authors analyzed the data. KS and WRH drafted the manuscript. All authors read  
787 and approved the final manuscript.

788

789 **Declaration of interests**

790 The authors declare that they have no competing interests.

## 791 References

- 792 1. Kühlbrandt, W. (2019). Structure and mechanisms of F-type ATP synthases.  
793 Annu. Rev. Biochem. 88, 515–549.
- 794 2. Gray, M.W. (2012). Mitochondrial evolution. Cold Spring Harb. Perspect. Biol. 4,  
795 a011403.
- 796 3. Maréchal, E. (2018). Primary endosymbiosis: emergence of the primary  
797 chloroplast and the chromatophore, two independent events. Methods Mol. Biol.  
798 Clifton NJ 1829, 3–16.
- 799 4. Martijn, J., Vosseberg, J., Guy, L., Offre, P., and Ettema, T.J.G. (2018). Deep  
800 mitochondrial origin outside the sampled alphaproteobacteria. Nature 557, 101–  
801 105.
- 802 5. Mereschkowsky, C. (1905). Über natur und ursprung der chromatophoren im  
803 pflanzenreiche. Biol Cent. 25, 593–604.
- 804 6. Ponce-Toledo, R.I., Deschamps, P., López-García, P., Zivanovic, Y., Benzerara,  
805 K., and Moreira, D. (2017). An early-branching freshwater cyanobacterium at the  
806 origin of plastids. Curr. Biol. 27, 386–391.
- 807 7. Sagan, L. (1967). On the origin of mitosing cells. J. Theor. Biol. 14, 255–274.
- 808 8. Hong, S., and Pedersen, P.L. (2008). ATP synthase and the actions of inhibitors  
809 utilized to study its roles in human health, disease, and other scientific areas.  
810 Microbiol. Mol. Biol. Rev. MMBR 72, 590–641.
- 811 9. Pullman, M.E., and Monroy, G.C. (1963). A naturally occurring inhibitor of  
812 mitochondrial adenosine triphosphatase. J. Biol. Chem. 238, 3762–3769.
- 813 10. Hashimoto, T., Yoshida, Y., and Tagawa, K. (1990). Regulatory proteins of F<sub>1</sub>F<sub>0</sub>-  
814 ATPase: role of ATPase inhibitor. J. Bioenerg. Biomembr. 22, 27–38.
- 815 11. Hong, S., and Pedersen, P.L. (2002). ATP synthase of yeast: structural insight  
816 into the different inhibitory potencies of two regulatory peptides and identification  
817 of a new potential regulator. Arch. Biochem. Biophys. 405, 38–43.
- 818 12. Solaini, G., Sgarbi, G., and Baracca, A. (2021). The F<sub>1</sub>F<sub>0</sub>-ATPase inhibitor, IF1, is  
819 a critical regulator of energy metabolism in cancer cells. Biochem. Soc. Trans.,  
820 BST20200742.
- 821 13. Mendoza-Hoffmann, F., Pérez-Oseguera, Á., Cevallos, M.Á., Zarco-Zavala, M.,  
822 Ortega, R., Peña-Segura, C., Espinoza-Simón, E., Uribe-Carvajal, S., and  
823 García-Trejo, J.J. (2018). The biological role of the ζ subunit as unidirectional  
824 inhibitor of the F<sub>1</sub>F<sub>0</sub>-ATPase of *Paracoccus denitrificans*. Cell Rep. 22, 1067–  
825 1078.
- 826 14. Hahn, A., Vonck, J., Mills, D.J., Meier, T., and Kühlbrandt, W. (2018). Structure,  
827 mechanism, and regulation of the chloroplast ATP synthase. Science 360.

- 828 15. Cozens, A.L., and Walker, J.E. (1987). The organization and sequence of the  
829 genes for ATP synthase subunits in the cyanobacterium *Synechococcus* 6301.  
830 Support for an endosymbiotic origin of chloroplasts. *J. Mol. Biol.* *194*, 359–383.
- 831 16. Nalin, C.M., and McCarty, R.E. (1984). Role of a disulfide bond in the gamma  
832 subunit in activation of the ATPase of chloroplast coupling factor 1. *J. Biol. Chem.*  
833 *259*, 7275–7280.
- 834 17. Miki, J., Maeda, M., Mukohata, Y., and Futai, M. (1988). The gamma-subunit of  
835 ATP synthase from spinach chloroplasts. Primary structure deduced from the  
836 cloned cDNA sequence. *FEBS Lett.* *232*, 221–226.
- 837 18. Mullineaux, C.W. (2014). Co-existence of photosynthetic and respiratory activities  
838 in cyanobacterial thylakoid membranes. *Biochim. Biophys. Acta BBA - Bioenerg.*  
839 *1837*, 503–511.
- 840 19. Mullineaux, C.W., and Liu, L.-N. (2020). Membrane dynamics in phototrophic  
841 bacteria. *Annu. Rev. Microbiol.* *74*, 633–654.
- 842 20. Sunamura, E.-I., Konno, H., Imashimizu-Kobayashi, M., Sugano, Y., and Hisabori,  
843 T. (2010). Physiological impact of intrinsic ADP inhibition of cyanobacterial  $F_0F_1$   
844 conferred by the inherent sequence inserted into the  $\gamma$  subunit. *Plant Cell Physiol.*  
845 *51*, 855–865.
- 846 21. Imashimizu, M., Bernát, G., Sunamura, E.-I., Broekmans, M., Konno, H., Isato, K.,  
847 Rögner, M., and Hisabori, T. (2011). Regulation of  $F_0F_1$ -ATPase from  
848 *Synechocystis* sp. PCC 6803 by  $\gamma$  and  $\epsilon$  subunits is significant for light/dark  
849 adaptation. *J. Biol. Chem.* *286*, 26595–26602.
- 850 22. Kopf, M., Klähn, S., Scholz, I., Matthiessen, J.K.F., Hess, W.R., and Voß, B.  
851 (2014). Comparative analysis of the primary transcriptome of *Synechocystis* sp.  
852 PCC 6803. *DNA Res.* *21*, 527–539.
- 853 23. Mitschke, J., Georg, J., Scholz, I., Sharma, C.M., Dienst, D., Bantscheff, J., Voß,  
854 B., Steglich, C., Wilde, A., Vogel, J., et al. (2011). An experimentally anchored  
855 map of transcriptional start sites in the model cyanobacterium *Synechocystis* sp.  
856 PCC6803. *Proc. Natl. Acad. Sci. USA* *108*, 2124–2129.
- 857 24. Baumgartner, D., Kopf, M., Klähn, S., Steglich, C., and Hess, W.R. (2016). Small  
858 proteins in cyanobacteria provide a paradigm for the functional analysis of the  
859 bacterial micro-proteome. *BMC Microbiol.* *16*, 285.
- 860 25. Mareš, J., Hrouzek, P., Kaňa, R., Ventura, S., Strunecký, O., and Komárek, J.  
861 (2013). The primitive thylakoid-less cyanobacterium *Gloeobacter* is a common  
862 rock-dwelling organism. *PLOS ONE* *8*, e66323.
- 863 26. Lou, P.-H., Hansen, B.S., Olsen, P.H., Tullin, S., Murphy, M.P., and Brand, M.D.  
864 (2007). Mitochondrial uncouplers with an extraordinary dynamic range. *Biochem.*  
865 *J.* *407*, 129–140.
- 866 27. Trebst, A. (2007). Inhibitors in the functional dissection of the photosynthetic  
867 electron transport system. *Photosynth. Res.* *92*, 217–224.

- 868 28. Rippka, R., Waterbury, J., and Cohen-Bazire, G. (1974). A cyanobacterium which  
869 lacks thylakoids. *Arch. Microbiol.* *100*, 419–436.
- 870 29. Partensky, F., Hess, W.R., and Vaultot, D. (1999). *Prochlorococcus*, a marine  
871 photosynthetic prokaryote of global significance. *Microbiol. Mol. Biol. Rev.* *63*,  
872 106–127.
- 873 30. Mitschke, J., Vioque, A., Haas, F., Hess, W.R., and Muro-Pastor, A.M. (2011).  
874 Dynamics of transcriptional start site selection during nitrogen stress-induced cell  
875 differentiation in *Anabaena* sp. PCC 7120. *Proc. Natl. Acad. Sci. USA* *108*,  
876 20130–20135.
- 877 31. Brenes-Álvarez, M., Olmedo-Verd, E., Vioque, A., and Muro-Pastor, A.M. (2016).  
878 Identification of conserved and potentially regulatory small RNAs in heterocystous  
879 cyanobacteria. *Front. Microbiol.* *7*, 48.
- 880 32. Washietl, S., Findeiss, S., Müller, S.A., Kalkhof, S., von Bergen, M., Hofacker, I.L.,  
881 Stadler, P.F., and Goldman, N. (2011). RNAcode: robust discrimination of coding  
882 and noncoding regions in comparative sequence data. *RNA* *17*, 578–594.
- 883 33. de Alvarenga, L.V., Hess, W.R., Hagemann, M., and Hagemann, M. (2020).  
884 AcnSP - a novel small protein regulator of aconitase activity in the  
885 cyanobacterium *Synechocystis* sp. PCC 6803. *Front. Microbiol.*, in review.
- 886 34. Bulyha, I., Schmidt, C., Lenz, P., Jakovljevic, V., Höne, A., Maier, B., Hoppert, M.,  
887 and Søgaard - Andersen, L. (2009). Regulation of the type IV pili molecular  
888 machine by dynamic localization of two motor proteins. *Mol. Microbiol.* *74*, 691–  
889 706.
- 890 35. Okamoto, S., and Ohmori, M. (2002). The cyanobacterial PilT protein responsible  
891 for cell motility and transformation hydrolyzes ATP. *Plant Cell Physiol.* *43*, 1127–  
892 1136.
- 893 36. Lamiable, A., Thévenet, P., Rey, J., Vavrusa, M., Derreumaux, P., and Tufféry, P.  
894 (2016). PEP-FOLD3: faster de novo structure prediction for linear peptides in  
895 solution and in complex. *Nucleic Acids Res.* *44*, W449-454.
- 896 37. Wu, Y., Li, Q., and Chen, X.-Z. (2007). Detecting protein-protein interactions by  
897 Far western blotting. *Nat. Protoc.* *2*, 3278–3284.
- 898 38. Sobti, M., Smits, C., Wong, A.S., Ishmukhametov, R., Stock, D., Sandin, S., and  
899 Stewart, A.G. (2016). Cryo-EM structures of the autoinhibited *E. coli* ATP  
900 synthase in three rotational states. *eLife* *5*, e21598.
- 901 39. Feniouk, B.A., Suzuki, T., and Yoshida, M. (2006). The role of subunit epsilon in  
902 the catalysis and regulation of F<sub>0</sub>F<sub>1</sub>-ATP synthase. *Biochim. Biophys. Acta* *1757*,  
903 326–338.
- 904 40. Konno, H., Murakami-Fuse, T., Fujii, F., Koyama, F., Ueoka-Nakanishi, H., Pack,  
905 C.-G., Kinjo, M., and Hisabori, T. (2006). The regulator of the F<sub>1</sub> motor: inhibition  
906 of rotation of cyanobacterial F<sub>1</sub>-ATPase by the epsilon subunit. *EMBO J.* *25*,  
907 4596–4604.

- 908 41. Gu, J., Zhang, L., Zong, S., Guo, R., Liu, T., Yi, J., Wang, P., Zhuo, W., and Yang,  
909 M. (2019). Cryo-EM structure of the mammalian ATP synthase tetramer bound  
910 with inhibitory protein IF1. *Science* 364, 1068–1075.
- 911 42. Rippka, R., Deruelles, J., Waterbury, J.B., Herdman, M., and Stanier, R.Y. (1979).  
912 Generic assignments, strain histories and properties of pure cultures of  
913 cyanobacteria. *Microbiology* 111, 1–61.
- 914 43. Zhang, L., McSpadden, B., Pakrasi, H.B., and Whitmarsh, J. (1992). Copper-  
915 mediated regulation of cytochrome c553 and plastocyanin in the cyanobacterium  
916 *Synechocystis* 6803. *J. Biol. Chem.* 267, 19054–19059.
- 917 44. Lippi, L., Bähr, L., Wüstenberg, A., Wilde, A., and Steuer, R. (2018). Exploring the  
918 potential of high-density cultivation of cyanobacteria for the production of  
919 cyanophycin. *Algal Res.* 31, 363–366.
- 920 45. Migur, A., Heyl, F., Fuss, J., Srikumar, A., Huettel, B., Steglich, C., Prakash,  
921 J.S.S., Reinhardt, R., Backofen, R., Owtrim, G.W., et al. (2021). The  
922 temperature-regulated DEAD-box RNA helicase CrhR interactome:  
923 Autoregulation and photosynthesis-related transcripts. *bioRxiv*,  
924 2021.03.26.437152.
- 925 46. Allen, M.M. (1968). Simple conditions for growth of unicellular blue-green algae  
926 on plates. *J. Phycol.* 4, 1–4.
- 927 47. Moore, L.R., Coe, A., Zinser, E.R., Saito, M.A., Sullivan, M.B., Lindell, D., Frois -  
928 Moniz, K., Waterbury, J., and Chisholm, S.W. (2007). Culturing the marine  
929 cyanobacterium *Prochlorococcus*. *Limnol. Oceanogr. Methods* 5, 353–362.
- 930 48. Beyer, H.M., Gonschorek, P., Samodelov, S.L., Meier, M., Weber, W., and  
931 Zurbriggen, M.D. (2015). AQUA cloning: a versatile and simple enzyme-free  
932 cloning approach. *PLOS ONE* 10, e0137652.
- 933 49. Olmedo-Verd, E., Muro-Pastor, A.M., Flores, E., and Herrero, A. (2006).  
934 Localized induction of the *ntcA* regulatory gene in developing heterocysts of  
935 *Anabaena* sp. strain PCC 7120. *J. Bacteriol.* 188, 6694–6699.
- 936 50. Brenes-Álvarez, M., Mitschke, J., Olmedo-Verd, E., Georg, J., Hess, W.R.,  
937 Vioque, A., and Muro-Pastor, A.M. (2019). Elements of the heterocyst-specific  
938 transcriptome unravelled by co-expression analysis in *Nostoc* sp. PCC 7120.  
939 *Environ. Microbiol.* 21, 2544–2558.
- 940 51. Muro-Pastor, A.M., Flores, E., and Herrero, A. (2009). NtcA-regulated heterocyst  
941 differentiation genes *hetC* and *devB* from *Anabaena* sp. strain PCC 7120 exhibit  
942 a similar tandem promoter arrangement. *J. Bacteriol.* 191, 5765–5774.
- 943 52. Markowitz, V.M., Chen, I.-M.A., Palaniappan, K., Chu, K., Szeto, E., Grechkin, Y.,  
944 Ratner, A., Jacob, B., Huang, J., Williams, P., et al. (2012). IMG: the Integrated  
945 Microbial Genomes database and comparative analysis system. *Nucleic Acids*  
946 *Res.* 40, D115-122.

- 947 53. Gertz, E.M., Yu, Y.-K., Agarwala, R., Schäffer, A.A., and Altschul, S.F. (2006).  
948 Composition-based statistics and translated nucleotide searches: Improving the  
949 TBLASTN module of BLAST. *BMC Biol.* 4, 41.
- 950 54. Altschul, S.F. (2014). BLAST Algorithm. In eLS (American Cancer Society).
- 951 55. Waterhouse, A.M., Procter, J.B., Martin, D.M.A., Clamp, M., and Barton, G.J.  
952 (2009). Jalview Version 2—a multiple sequence alignment editor and analysis  
953 workbench. *Bioinformatics* 25, 1189–1191.
- 954 56. Audain, E., Ramos, Y., Hermjakob, H., Flower, D.R., and Perez-Riverol, Y. (2016).  
955 Accurate estimation of isoelectric point of protein and peptide based on amino  
956 acid sequences. *Bioinforma. Oxf. Engl.* 32, 821–827.
- 957 57. Kumar, S., Stecher, G., Li, M., Knyaz, C., and Tamura, K. (2018). MEGA X:  
958 molecular evolutionary genetics analysis across computing platforms. *Mol. Biol.*  
959 *Evol.* 35, 1547–1549.
- 960 58. Quast, C., Pruesse, E., Yilmaz, P., Gerken, J., Schweer, T., Yarza, P., Peplies, J.,  
961 and Glöckner, F.O. (2013). The SILVA ribosomal RNA gene database project:  
962 improved data processing and web-based tools. *Nucleic Acids Res.* 41, D590-596.
- 963 59. Klähn, S., Baumgartner, D., Pfreundt, U., Voigt, K., Schön, V., Steglich, C., and  
964 Hess, W.R. (2014). Alkane biosynthesis genes in cyanobacteria and their  
965 transcriptional organization. *Front. Bioeng. Biotechnol.* 2.
- 966 60. Tamura, K., Nei, M., and Kumar, S. (2004). Prospects for inferring very large  
967 phylogenies by using the neighbor-joining method. *Proc. Natl. Acad. Sci.* 101,  
968 11030–11035.
- 969 61. Muro-Pastor, A.M. (2014). The heterocyst-specific NsiR1 small RNA is an early  
970 marker of cell differentiation in cyanobacterial filaments. *mBio* 5, e01079-01014.
- 971 62. Bonn, F., Bartel, J., Büttner, K., Hecker, M., Otto, A., and Becher, D. (2014).  
972 Picking vanished proteins from the void: how to collect and ship/share extremely  
973 dilute proteins in a reproducible and highly efficient manner. *Anal. Chem.* 86,  
974 7421–7427.
- 975 63. Perez-Riverol, Y., Csordas, A., Bai, J., Bernal-Llinares, M., Hewapathirana, S.,  
976 Kundu, D.J., Inuganti, A., Griss, J., Mayer, G., Eisenacher, M., et al. (2019). The  
977 PRIDE database and related tools and resources in 2019: improving support for  
978 quantification data. *Nucleic Acids Res.* 47, D442–D450.
- 979 64. Tyanova, S., Temu, T., Sinitcyn, P., Carlson, A., Hein, M.Y., Geiger, T., Mann, M.,  
980 and Cox, J. (2016). The Perseus computational platform for comprehensive  
981 analysis of (prote)omics data. *Nat. Methods* 13, 731–740.
- 982 65. Pinto, F.L., Thapper, A., Sontheim, W., and Lindblad, P. (2009). Analysis of  
983 current and alternative phenol based RNA extraction methodologies for  
984 cyanobacteria. *BMC Mol. Biol.* 10, 79.



- 985 66. Mohamed, A., and Jansson, C. (1989). Influence of light on accumulation of  
986 photosynthesis-specific transcripts in the cyanobacterium *Synechocystis* 6803.  
987 *Plant Mol. Biol.* *13*, 693–700.
- 988 67. Dong, Y., and Xu, X. (2009). Outer membrane proteins induced by iron deficiency  
989 in *Anabaena* sp. PCC 7120. *Prog. Nat. Sci.* *19*, 1477–1483.
- 990 68. Krauspe, V., Fahrner, M., Spät, P., Steglich, C., Frankenberg-Dinkel, N., Maček,  
991 B., Schilling, O., and Hess, W.R. (2021). Discovery of a novel small protein factor  
992 involved in the coordinated degradation of phycobilisomes in cyanobacteria. *Proc.*  
993 *Natl. Acad. Sci. USA* *118*, e2012277118.
- 994 69. Rzhetsky, A., and Nei, M. (1992). A simple method for estimating and testing  
995 minimum-evolution trees. *Mol. Biol. Evol.* *9*, 945–945.
- 996 70. Felsenstein, J. (1985). Confidence limits on phylogenies: an approach using the  
997 Bootstrap. *Evolution* *39*, 783–791.
- 998 71. Schägger, H. (2006). Tricine-SDS-PAGE. *Nat. Protoc.* *1*, 16–22.
- 999 72. Tusher, V.G., Tibshirani, R., and Chu, G. (2001). Significance analysis of  
1000 microarrays applied to the ionizing radiation response. *Proc. Natl. Acad. Sci.* *98*,  
1001 5116–5121.
- 1002

## Figures

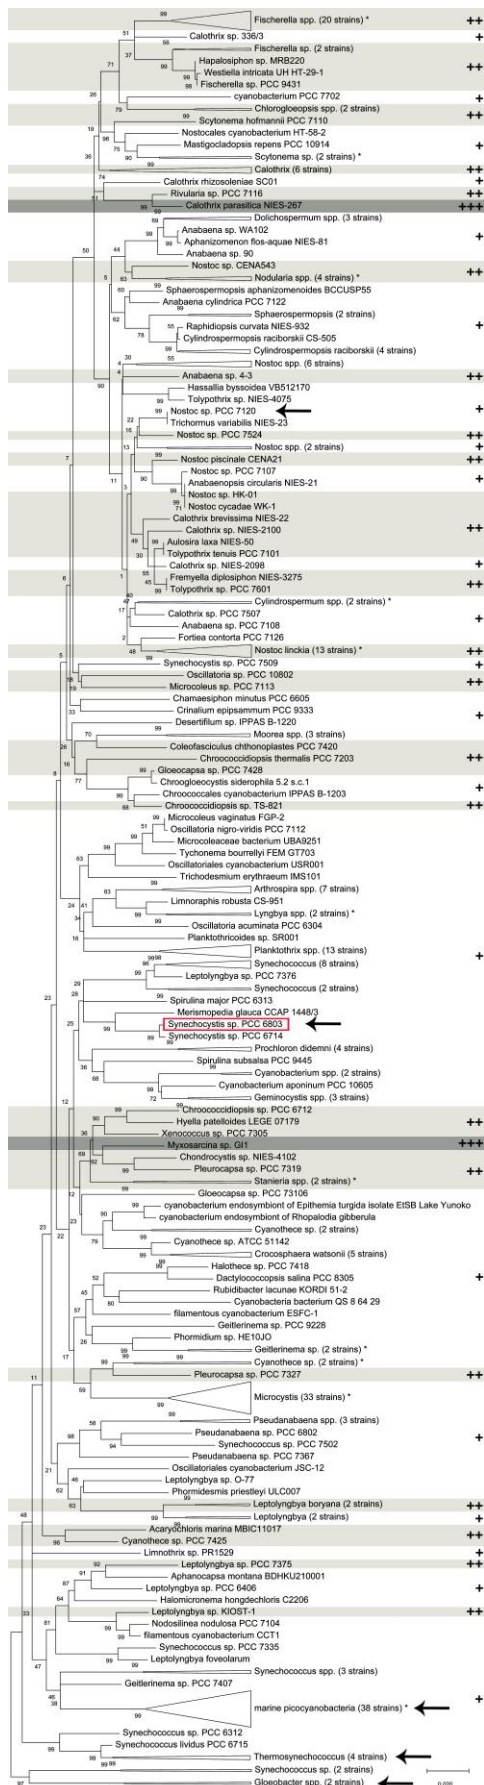

**Figure 1. Distribution and numbers of *atpT* genes throughout the cyanobacterial phylum.** Phylogenetic tree of cyanobacteria based on 16S rRNA sequences (SILVA database<sup>58</sup> constructed in MEGAX<sup>57</sup> using the minimum evolution method<sup>69</sup>). The number of individual strains is given in brackets if several strains were joined at one branch (e.g., (33) for *Microcystis*), marine picocyanobacteria consisting of *Prochlorococcus* and marine *Synechococcus*. The numbers of putative *atpT* homologs in each strain are indicated (+, one; ++, two; +++, three homologs) and additionally highlighted in shades of gray if more than one. Single deviations within clusters of strains joined at one branch are labeled by asterisks (e.g., among the 20 *Fischerella* spp. strains in the uppermost cluster is one strain with one homolog, while all others have two). Species selected for experimental analyses in this study are labeled by arrows, and the location of the *Synechocystis* 6803 model strain is additionally highlighted by a red box. The optimal tree with the sum of branch length = 5.06878059 is shown. The percentage of replicate trees in which the associated taxa clustered together in the bootstrap test (500 replicates) is shown next to the branches<sup>70</sup>. The tree is drawn to scale, with branch lengths in the same units as the units of the evolutionary distances used to infer the phylogenetic tree. The analysis involved 318 nucleotide sequences. All ambiguous positions were removed for each sequence pair (pairwise deletion option). There were a total of 1753 positions in the final dataset. The sequences of all potential Atp $\Theta$  homologs are given in **Table S1**.



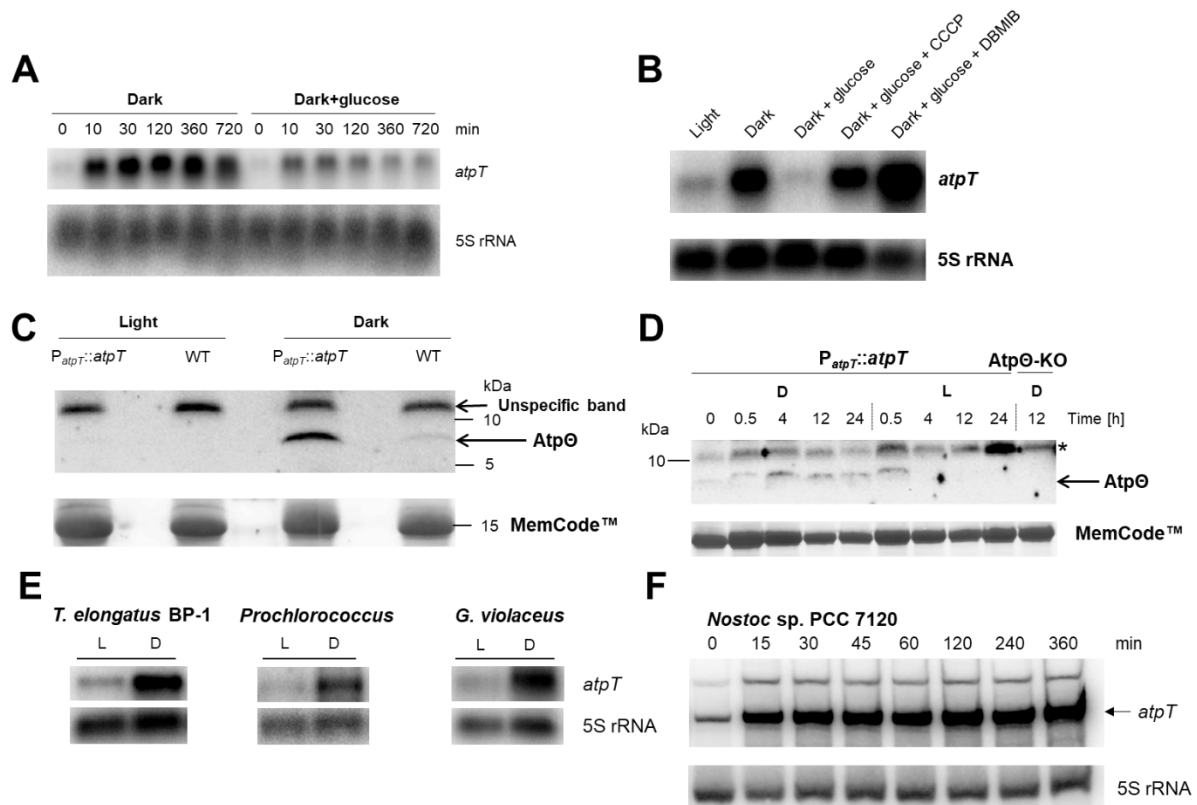

**Figure 2. Expression of *atpT* is stimulated by low energy, uncoupling or inhibition of electron transfer. (A)** Time course of *atpT* mRNA accumulation in the dark in the presence or absence of glucose (10 mM). Exponentially growing *Synechocystis* 6803 WT cells were harvested at the indicated time points before and after transfer to darkness. Northern hybridization was carried out after separation and blotting of 1  $\mu$ g of total RNA with a  $^{32}$ P-labeled, single-stranded transcript probe specifically recognizing *atpT*. **(B)** *atpT* mRNA accumulation after 6 h under the indicated conditions and treatments. CCCP and DBMIB were added to final concentrations of 10  $\mu$ M and 100  $\mu$ M, respectively. **(C)** Western blot experiment for the detection of native Atp $\Theta$ . Protein levels were compared in *Synechocystis* 6803 wild-type (WT) cells and in cultures carrying the  $P_{atpT}::atpT$  construct in which the untagged *atpT* gene was overexpressed from its native promoter on the plasmid vector pVZ322 in addition to the native gene copy. Identical amounts of 150  $\mu$ g total protein were separated by Tricine SDS-PAGE<sup>71</sup> and probed with anti-Atp $\Theta$  serum after transfer to nitrocellulose membrane. Precision Plus Protein™ DualXtra (2-250 kDa, Bio-Rad) was used as molecular mass marker. The same membrane was stained with MemCode™ as a loading control. **(D)** Atp $\Theta$  expression under changing light conditions. Samples for protein extraction were collected at the indicated time points. Approximately 150  $\mu$ g (calculated according to Direct Detect™ Spectrometer measurements) of protein samples was separated. PageRuler™ Prestained Protein Ladder (10–170 kDa, Fermentas) was used as molecular mass marker. MemCode™ staining served as a loading control. D, darkness, L, standard light ( $\sim 40 \mu\text{mol photons m}^{-2} \text{s}^{-1}$ ), Atp $\Theta$ -KO, Atp $\Theta$  knockout (only last lane). In panels **(C)** and **(D)**, the position of untagged Atp $\Theta$  is indicated, \* indicates a strong cross-reacting band. **(E)**

Northern analysis of potential *atpT* homologs in *Thermosynechococcus elongatus* BP-1, *Prochlorococcus* sp. MED4, and *Gloeobacter violaceus* PCC 7421. For each sample, 5 µg of total RNA was loaded. L, strains were cultured in constant light; D, light-cultured strains were incubated in darkness for 6 h. **(F)** Time course of *atpT* mRNA accumulation in *Nostoc* 7120 in cultures transferred from light to darkness for the indicated times. In panels (A), (B), (E) and (F) the respective 5S rRNA was hybridized as a loading control.

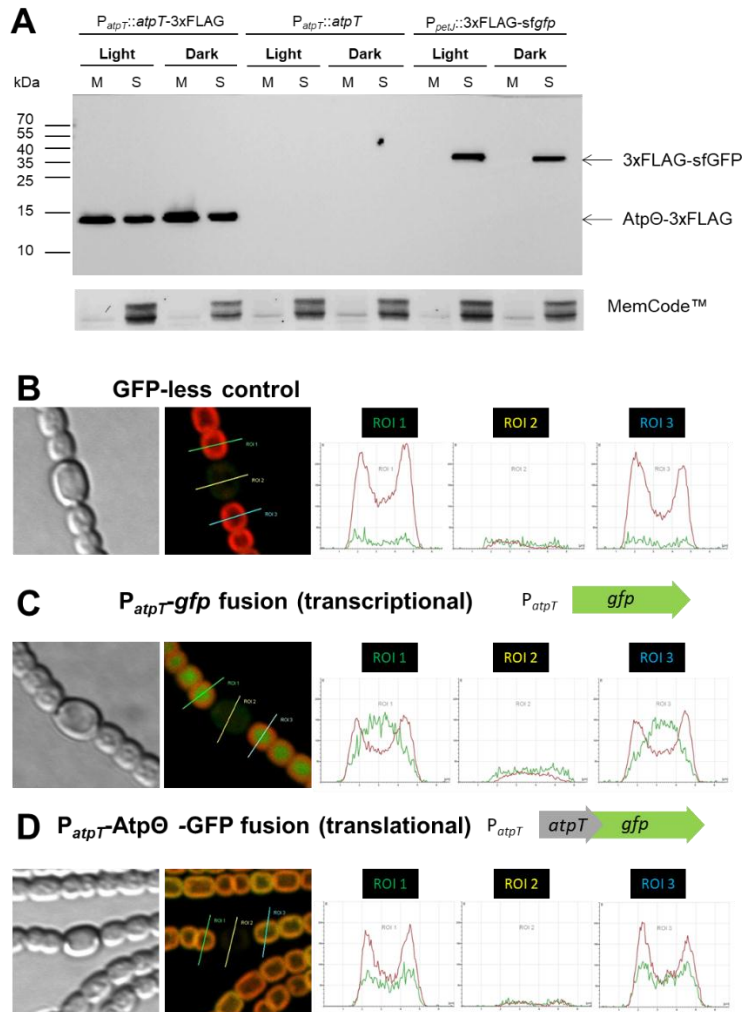

**Figure 3. Intracellular localization of AtpΘ. (A)** Localization of FLAG fusion proteins by separation of the membrane fraction from soluble proteins. Samples for protein extraction were taken from light- and dark (12 h incubation)-grown cultures of *Synechocystis* 6803 mutant strains:  $P_{atpT}::atpT-3xFLAG$  and  $P_{petJ}::3xFLAG-sfgfp$  expressed the recombinant AtpΘ and Gfp-FLAG fusion proteins, respectively, whereas  $P_{atpT}::atpT$  was used as a negative control. Proteins (10 μg) were separated on a 15% (w/v) glycine SDS polyacrylamide gel and transferred to a nitrocellulose membrane, which was probed with specific ANTI-FLAG® M2-Peroxidase (HRP) antibody. MemCode™ Reversible Protein staining was used to check for equal protein loading. M, membrane fraction, S, soluble fraction. **(B) to (D)** Fluorescence-based analysis of the localization of AtpΘ in *Nostoc* 7120 bearing different fusions to GFP. **(B)** GFP-less control. **(C)** Transcriptional fusion: The *gfp* gene was placed under the control of the *atpT* promoter and 5'UTR (construct pSAM342, **Table S2**). **(D)** Translational fusion: The *gfp* gene was placed under the control of the *atpT* promoter and fused to the *atpT* coding region (pSAM344, **Table S2**). In panels **(B) to (D)**, first, light transmission microscopy is shown, followed by fluorescence in the GFP channel merged with chlorophyll autofluorescence. The following three diagrams show the fluorescence intensities in cross sections region of interest (ROI) 1 to ROI 3 in three

consecutive single cells, two vegetative cells and one heterocyst in the middle. GFP fluorescence is depicted in green, and chlorophyll autofluorescence is depicted in red.

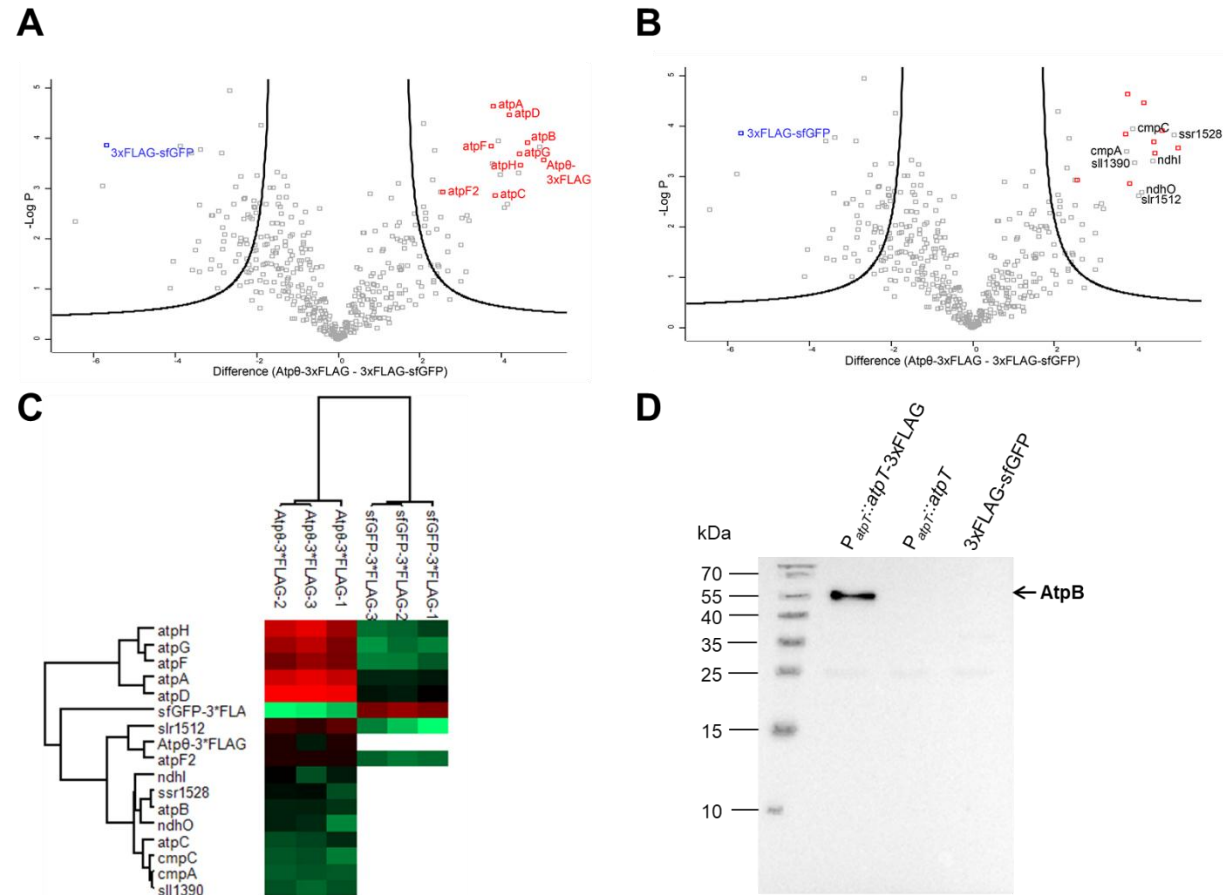

**Figure 4. Copurification of Atp $\theta$  and the ATP synthase complex verified by mass spectrometry and immunoblot analysis.** **(A)** Volcano plot generated based on a two-sample  $t$ -test of enriched proteins using a false discovery rate (FDR) of 0.01 and a coefficient for variance minimization  $s_0^{72}$  of 2. Atp $\theta$ -3xFLAG and the identified subunits of F<sub>0</sub>F<sub>1</sub> ATP synthase are marked in red, while 3xFLAG-GFP is marked in blue. Subunit b' (AtpF2) was added manually to the plot since this subunit was detected in only 2 out of 3 replicates. **(B)** The same volcano plot shown in **(A)** labeled with non-ATP synthase proteins. **(C)** Clustering heat map of the Atp $\theta$ -3xFLAG-enriched proteins marked in volcano plots **(A)** and **(B)**. The log<sub>2</sub> transformed NSAF intensities are indicated by different

colors as indicated below. Undetected proteins in the 3xFLAG-GFP-enriched samples were left blank. 3xFLAG-GFP was detected in the Atp $\theta$ -3xFLAG group due to their common 3xFLAG tag. **(D)** Probing the elution fractions of P<sub>*atpT*</sub>::*atpT*-3xFLAG, P<sub>*atpT*</sub>::*atpT* and P<sub>*petJ*</sub>::3xFLAG-*sfgfp* with anti-AtpB serum.

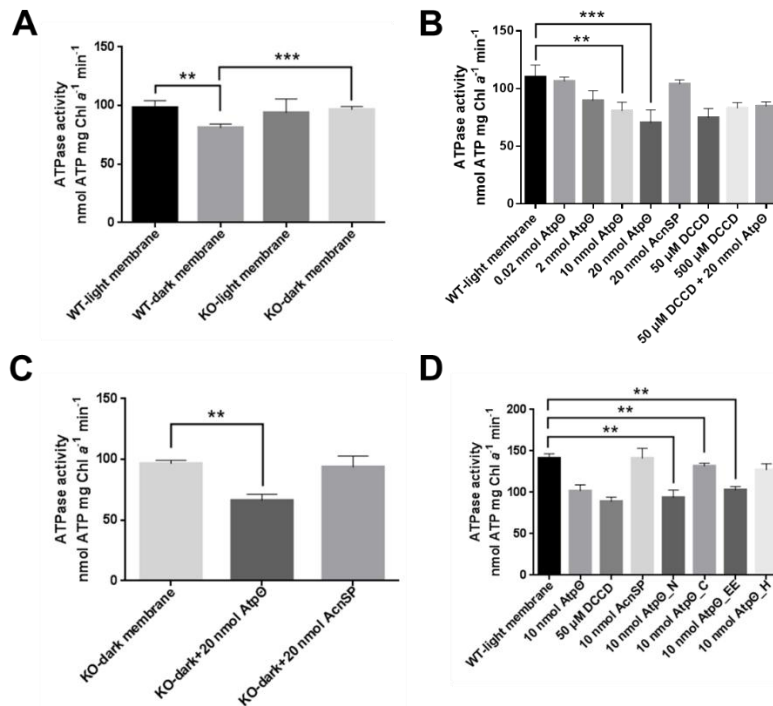

**Figure 5. ATPase activities in membrane fractions. (A)** ATPase activity of the membrane fraction of wild type and *atpT* knockout *Synechocystis* 6803 cells growing under continuous light or after 24 hours of darkness incubation. **(B)** ATPase activity of the membrane fraction of wild-type *Synechocystis* 6803 supplemented with different synthetic peptides or chemicals. DCCD was used as a positive control for ATPase activity inhibition, while the synthetic AcnSP peptide was used as a negative control. **(C)** ATPase activity of the membrane fraction isolated from *atpT* knockout *Synechocystis* 6803 cells after 24 hours of darkness incubation supplemented with either synthetic Atp $\Theta$  or AcnSP peptide. **(D)** ATPase inhibitory effects of Atp $\Theta$  peptides with truncated or modified sequences (**Figure S4**). The differences between groups were tested using GraphPad software as described in the methods section. Significance was established at  $P < 0.05 = **$  and  $P < 0.01 = ***$ .



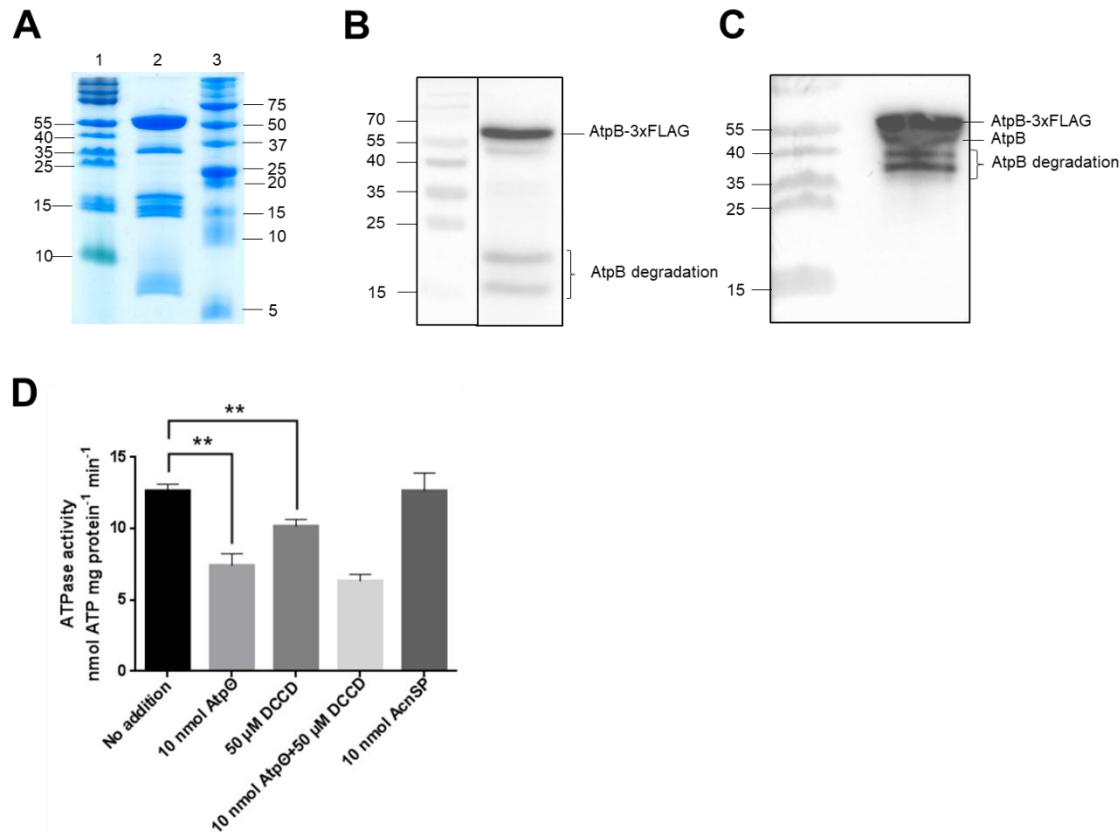

**Figure 6. Effect of Atp $\Theta$  on the purified F<sub>0</sub>F<sub>1</sub> ATP synthase. (A)** Tricine SDS-PAGE displaying the purity of 10  $\mu$ g *Synechocystis* 6803 F<sub>0</sub>F<sub>1</sub> ATP synthase (lane 2) isolated with 3xFLAG-AtpB and gel filtration chromatography. PageRuler™ Prestained Protein Ladder (lane 1; 10 to 180 kDa) and Precision Plus Protein™ Dual Xtra Prestained Protein Standard (lane 3; 2 to 250 kDa) were used as molecular mass markers. **(B)** Western blot analysis of 10  $\mu$ g purified *Synechocystis* 6803 F<sub>0</sub>F<sub>1</sub> ATP synthase probed with specific ANTI-FLAG® M2-Peroxidase (HRP) antibody. **(C)** Western blot analysis of 10  $\mu$ g purified *Synechocystis* 6803 F<sub>0</sub>F<sub>1</sub> ATP synthase probed with anti-AtpB serum. The doublet for AtpB consists of the native and 3xFLAG-tagged forms of the protein. Bands in panels b and c likely resulting from degradation are labeled. **(D)** Measurement of the ATP hydrolysis activity of purified F<sub>0</sub>F<sub>1</sub> ATP synthase supplemented with different synthetic peptides or chemicals. DCCD was used as a positive control for ATPase activity inhibition, while the synthetic AcnSP peptide was used as a negative control. The differences between groups were tested using a paired *t*-test (**Table S10**) using GraphPad software. Significance was established at \*\*, *P* < 0.05.

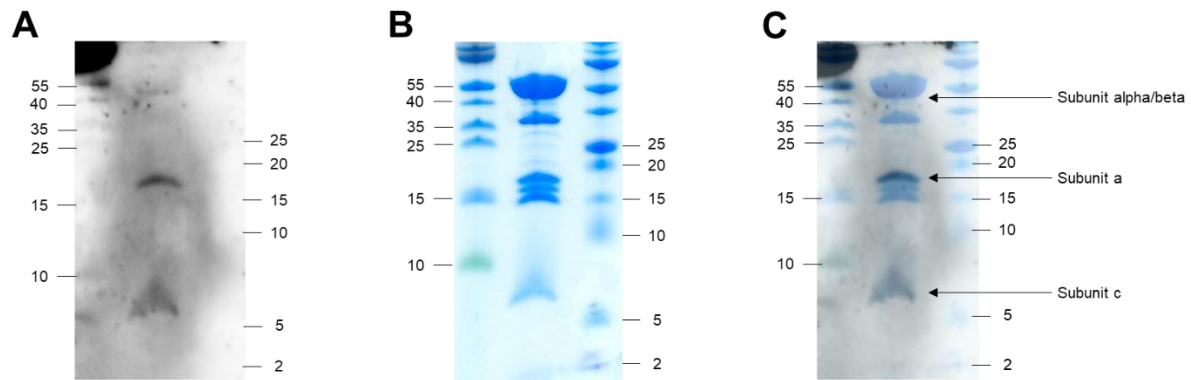

**Figure 7. Interaction of of Atp $\Theta$  and F<sub>0</sub>F<sub>1</sub> ATP synthase verified by Far Western blot analysis. (A)** Far Western blot signal detecting the interaction partners of synthetic Atp $\Theta$  peptide from purified *Synechocystis* 6803 F<sub>0</sub>F<sub>1</sub> ATP synthase. **(B)** Coomassie blue staining of the Tricine-SDS gel after blotting. **(C)** The immunoblot signal **(A)** was merged with the stained gel **(B)** to determine the interacting subunits. The subunits suspected to interact with Atp $\theta$  are labeled. PageRuler™ Prestained Protein Ladder (10–170 kDa, Fermentas; left) and Protein™ DualXtra (2-250 kDa, Bio-Rad; right) were used as molecular mass markers. In total, 15  $\mu$ g purified ATP synthase was loaded on the gel.
