1     **Atp $\Theta$  is an inhibitor of F<sub>0</sub>F<sub>1</sub> ATP synthase to arrest ATP hydrolysis**  
2                     **during low-energy conditions in cyanobacteria**

3  
4     Kuo Song<sup>1</sup>, Desirée Baumgartner<sup>1,§</sup>, Martin Hagemann<sup>2</sup>, Alicia M. Muro-Pastor<sup>3</sup>,  
5     Sandra Maaß<sup>4</sup>, Dörte Becher<sup>4</sup>, and Wolfgang R. Hess<sup>1,\*</sup>

6  
7     <sup>1</sup>University of Freiburg, Faculty of Biology, Genetics and Experimental Bioinformatics,  
8     Schänzlestr. 1, D-79104 Freiburg, Germany;

9     <sup>2</sup>University of Rostock, Institute of Biosciences, Plant Physiology Department, Albert-  
10     Einstein-Str. 3, D-18059 Rostock, Germany;

11     <sup>3</sup>Instituto de Bioquímica Vegetal y Fotosíntesis, Consejo Superior de Investigaciones  
12     Científicas and Universidad de Sevilla, E-41092 Sevilla, Spain;

13     <sup>4</sup>University of Greifswald, Department of Microbial Proteomics, Institute of  
14     Microbiology, D-17489 Greifswald, Germany.

15  
16     \***Lead contact:** [wolfgang.hess@biologie.uni-freiburg.de](mailto:wolfgang.hess@biologie.uni-freiburg.de), University of Freiburg,  
17     Faculty of Biology, Genetics and Experimental Bioinformatics, Schänzlestr. 1, D-79104  
18     Freiburg, Germany; phone: +49-761-2032796; FAX: +49-761-2032745.

19  
20     <sup>§</sup>Current address: Laboratory for MEMS Applications, IMTEK - Department of  
21     Microsystems Engineering, University of Freiburg, Georges-Köhler-Allee 103, D-  
22     79110 Freiburg, Germany

23 **Summary**

24 Biological processes in all living cells are powered by ATP, a nearly universal molecule  
25 of energy transfer. ATP synthases produce ATP utilizing proton gradients that are  
26 usually generated by either respiration or photosynthesis. However, cyanobacteria are  
27 unique in combining photosynthetic and respiratory electron transport chains in the  
28 same membrane system, the thylakoids. How cyanobacteria prevent the futile reverse  
29 operation of ATP synthase under unfavorable conditions pumping protons while  
30 hydrolyzing ATP is mostly unclear. Here, we provide evidence that the small protein  
31 Atp $\Theta$ , which is widely conserved in cyanobacteria, is mainly fulfilling this task. The  
32 expression of Atp $\Theta$  becomes induced under conditions such as darkness or heat  
33 shock, which can lead to a weakening of the proton gradient. Translational fusions of  
34 Atp $\Theta$  to the green fluorescent protein revealed targeting to the thylakoid membrane.  
35 Immunoprecipitation assays followed by mass spectrometry and far Western blots  
36 identified subunits of ATP synthase as interacting partners of Atp $\Theta$ . ATP hydrolysis  
37 assays with isolated membrane fractions as well as purified ATP synthase complexes  
38 demonstrated that Atp $\Theta$  inhibits ATPase activity in a dose-dependent manner similar  
39 to the F<sub>0</sub>F<sub>1</sub>-ATP synthase inhibitor N,N-dicyclohexylcarbodiimide. The results show  
40 that, even in a well-investigated process, crucial new players can be discovered if small  
41 proteins are taken into consideration and indicate that ATP synthase activity can be  
42 controlled in surprisingly different ways.

43

44 **Keywords:** ATP synthase, cyanobacteria, *Synechocystis*, small proteins

45

46

## 47 **Introduction**

48 ATP synthases of the F<sub>0</sub>F<sub>1</sub> type are multisubunit protein complexes anchored to  
49 membranes that convert proton (or sodium ion) gradients into chemical energy in the  
50 form of ATP<sup>1</sup>. Proton gradients are established by divergent processes, such as  
51 respiratory electron transport in mitochondria or photosynthetic electron transport in  
52 chloroplasts. Mitochondria and chloroplasts originate from the endosymbiotic uptake  
53 of an  $\alpha$ -proteobacterium and a cyanobacterium, respectively<sup>2-7</sup>. Therefore, it is not  
54 surprising that F<sub>0</sub>F<sub>1</sub>-ATP synthases share close functional and structural similarities  
55 among eukaryotes and bacteria.

56 Under conditions weakening the proton gradient, ATP synthases can operate  
57 backwards, pumping protons while hydrolyzing ATP. Therefore, different regulatory  
58 mechanisms have evolved to stop the futile reverse reaction. Mitochondrial ATP  
59 synthases employ small peptides for inhibition, one, designated inhibitory factor 1  
60 (IF1), in mammals<sup>8,9</sup> and three, called IF1, STF1 and STF2, in yeast<sup>10,11</sup>. IF1 inhibits  
61 the ATPase activity of mitochondrial ATP synthase under conditions when the  
62 membrane potential collapses, e.g., during anoxia in cancer cells<sup>12</sup>. In bacteria, some  
63 regulatory factors of ATP synthase are known as well, such as the  $\zeta$  subunit in  
64 *Paracoccus denitrificans* and related  $\alpha$ -proteobacteria<sup>13</sup>, but IF1, as a representative  
65 of the class of alpha-helical basic peptide inhibitors in eukaryotes, has no homologs  
66 among prokaryotes.

67 Plant chloroplasts, in contrast, use a different mechanism to inhibit the  
68 hydrolysis activity of ATP synthase. Here, the  $\gamma$  subunit encoded by *atpC* responds to  
69 redox signals, thereby preventing the back reaction of ATP synthase when the  
70 photosynthetic proton gradient ceases, particularly during the night<sup>14</sup>. The *atpC* gene  
71 and the encoded  $\gamma$  subunit in chloroplasts are very similar to their homologs from

72 cyanobacteria, consistent with the endosymbiotic origin of chloroplast ATP synthase  
73 from an ancient cyanobacterium<sup>15</sup>. The chloroplast  $\gamma$  subunit, however, possesses a  
74 short insertion of nine extra amino acids (–EICDINGXC–), including two cysteine  
75 residues<sup>16</sup> that can form a disulfide bond under oxidizing conditions, which entirely  
76 blocks rotation and prevents ATP hydrolysis<sup>1</sup>. Upon illumination, the chloroplasts  
77 become reduced, and the disulfide bridge in the  $\gamma$  subunit opens, which activates ATP  
78 synthase because the  $\gamma$  subunit can rotate freely. The respective nine-amino-acid  
79 insertion in chloroplast  $\gamma$  subunits is strictly conserved in plants but missing from any  
80 of the homologs in cyanobacteria<sup>17</sup>. In contrast to chloroplasts, in cyanobacteria,  
81 photosynthetic and respiratory electron transport chains are both located in the same  
82 membrane system, the thylakoids, and even share some components<sup>18</sup>. Therefore,  
83 cyanobacteria cannot shut down ATP synthase as strictly as plant chloroplasts during  
84 the dark phase, since both the photosynthetic and respiratory electron chains generate  
85 proton gradients at the thylakoid membranes during day and night, respectively, which  
86 are used by the same ATP synthase for the generation of ATP<sup>19</sup>. Hence, the  
87 cyanobacterial ATP synthase complexes cannot be controlled by the same redox-  
88 sensitive mechanism as operating in the chloroplast.

89         Nevertheless, several mechanisms have been identified for the regulation of  
90 ATP synthase activity in cyanobacteria, the ADP-mediated inhibition that relies on the  
91  $\gamma$  subunit<sup>20</sup> and  $\epsilon$  subunit-mediated inhibition<sup>21</sup>. These findings provided hints that also  
92 mechanisms to prevent wasteful ATP hydrolysis activity of ATP synthase might exist  
93 in cyanobacteria.

94         Here, we provide evidence that a small protein previously called Norf1 (for novel  
95 ORF1) acts as ATP synthase regulator in cyanobacteria. Norf1 was initially discovered  
96 in the model cyanobacterium *Synechocystis* sp. PCC 6803 (*Synechocystis* 6803)

97 based on the detection of its mRNA in transcriptomic datasets<sup>22,23</sup>. *Synechocystis* 6803  
98 Norf1 comprises 48 amino acids, and its expression was confirmed at the protein level  
99 by Western blot analyses<sup>24</sup>. The *norf1* mRNA level was found to increase dramatically  
100 after the transfer of cultures into darkness<sup>22</sup>. Darkness-stimulated gene expression is  
101 very unusual in cyanobacteria, that base their physiology on light-dependent oxygenic  
102 photosynthesis. In *Synechocystis* 6803, only 62 out of a total of 4,091 experimentally  
103 defined transcriptional units exhibited maximum expression in the dark<sup>22</sup>. Therefore, it  
104 appeared elusive why a free-standing gene encoding a small protein of just 48 amino  
105 acids would be regulated in this way and make its transcript the mRNA with the highest  
106 absolute read count after 12 h in darkness<sup>22</sup>.

107 To elucidate Norf1 function, we scrutinized its expression here in more detail,  
108 investigated mutant strains and identified interacting proteins. Norf1 is a soluble  
109 protein, but membrane fractionation experiments and fusions to GFP showed targeting  
110 to the thylakoid membrane. Immunoprecipitation followed by mass spectrometry and  
111 far Western blot suggested specific interactions with subunits of the ATP synthase  
112 complex. Finally, measurements of ATP hydrolysis in isolated membrane fractions,  
113 and purified ATP synthase complexes revealed that Norf1 is recruited during  
114 unfavorable conditions as an inhibitory subunit that prevents the hydrolysis of ATP.  
115 These findings prompted us to rename Norf1 and its gene to Atp $\Theta$  for the  
116 cyanobacterial ATP synthase inhibiTory factor (gene *atpT*).

117

## 118 Results

### 119 Genes encoding homologs of Atp $\Theta$ are widely distributed throughout the 120 cyanobacterial phylum

121 The 48 amino acid sequence of the previously identified *Synechocystis* 6803 Norf1  
122 protein<sup>24</sup>, here renamed Atp $\Theta$ , was used to search for homologs, resulting in the  
123 identification of highly similar proteins in 318 available cyanobacterial genomes,  
124 including all finished genomes and some of the permanent draft genomes (**Figure 1**).  
125 The occurrence, sequence and predicted isoelectric points of Atp $\Theta$  homologs are given  
126 in **Table S1**. These homologs were predicted based on quite short amino acid  
127 sequences; therefore, we cannot rule out that the list includes some false positives or  
128 that some homologs might have been missed. While most cyanobacterial genomes  
129 (228/318) possess a single *atpT* gene, we also identified 88 genomes with two and two  
130 genomes with three putative homologs (**Figure S1A**). Putative *atpT* homologs were  
131 not detected outside the cyanobacterial phylum, but homologs were found in two  
132 *Gloeobacter* species considered to represent the most ancestral clade<sup>25</sup>, pointing at  
133 an early and stable acquisition of *atpT* in the cyanobacterial radiation (**Figure 1**). Most  
134 of the genomes containing two homologs are relatively large (median 6.23 Mb) and  
135 belong mainly to the genera *Fischerella*, *Calothrix*, *Scytonema* and *Nostoc*. The  
136 different copies in one strain are not identical, making their origin from recent gene  
137 duplications unlikely. The majority of the putative homologs are between 39 and 70  
138 amino acids in length (**Figure S1B**), except those in *Halomicronema hongdechloris*  
139 C2206 and *Pseudanabaena* sp. PCC 7367 with 94 and 82 amino acids, respectively.  
140 However, the homolog in *Pseudanabaena* sp. PCC 7367 exhibits pronounced  
141 sequence similarity only within its central and C-terminal residues, potentially being

142 translated from an internal start codon (marked in **Table S1** in red) and yielding a  
143 peptide of 51 residues.

144 Atp $\Theta$  homologs are predicted to be soluble proteins lacking transmembrane helices.  
145 Sequence comparison of selected Atp $\Theta$  homologs covering strains from all identified  
146 larger phylogenetic clusters among cyanobacteria showed quite different sequences,  
147 with only 7 widely conserved residues (**Figure S1C**). These residues include aromatic  
148 residues at positions 13 and 22, negatively charged residues at positions 16 and 27  
149 and a conserved proline at position 30 with regard to the *Synechocystis* 6803 protein.  
150 This divergence is also reflected in the isoelectric points (IPs), which were predicted to  
151 range from acidic values (Atp $\Theta$  in *Synechocystis* 6803 and *Microcystis*) to very alkaline  
152 values (>11) for Atp $\Theta$  from thermophilic strains (**Table S1**).

153

#### 154 **Energy supply and proton gradient integrity impact *atpT* transcription**

155 Northern blot experiments showed that the *atpT* transcript level increased within 10  
156 min after transfer to darkness, rapidly reaching maximum values 30 min after transfer  
157 and declined only marginally at the latest time point (**Figure 2A**). The addition of 10  
158 mM glucose neutralized the strong darkness-induced activation of gene expression  
159 (**Figure 2A**), suggesting that the stimulation of *atpT* transcript accumulation in the dark  
160 is connected to the energy supply for respiration. Based on these results, we chose an  
161 incubation time of 6 h in darkness for subsequent experiments. High *atpT* expression  
162 was also previously associated with transfer to darkness or low light conditions,  
163 entering stationary phase or heat shock<sup>22,24</sup>. We reasoned that all these conditions  
164 compromise photosynthetic activity and may affect the cellular redox status. Therefore,  
165 we tested additional conditions that interfere with the proton gradient or the electron  
166 transfer chain. Indeed, the parallel presence of the uncoupler carbonyl cyanide *m*-

167 chlorophenyl hydrazone (CCCP)<sup>26</sup> or of the electron transport inhibitor 2,5-dibromo-3-  
168 methyl-6-isopropyl-*p*-benzoquinone (DBMIB)<sup>27</sup> restored the high transcript  
169 accumulation in the dark despite the addition of glucose (**Figure 2B**). These results  
170 indicated that it was not the lack of light *per se* that triggered *atpT* expression. Instead,  
171 the enhanced respiration fostered by the addition of glucose led to the suppression of  
172 the dark-induced increase in transcript accumulation, while CCCP or DBMIB lifted this  
173 suppression. We conclude that it was the potentially low capacity for ATP synthesis  
174 due to a diminished or absent proton gradient that triggered high *atpT* expression.

175 To evaluate the accumulation of the Atp $\Theta$  protein, a specific antibody was raised  
176 that detected a faint band with an apparent molecular mass of 8 kDa in samples from  
177 *Synechocystis* 6803 wild-type cultures grown in the dark but not in the light (**Figure**  
178 **2C**). Expression of Atp $\Theta$  under the control of its native promoter from plasmid vector  
179 pVZ322 enhanced the detected band more than twofold, caused by the higher copy  
180 number of the plasmid-located gene. Western blot analysis also showed that Atp $\Theta$   
181 started to accumulate 0.5 h after transfer to darkness and continued to become more  
182 abundant over a time period of 4 h, after which it remained at approximately the same  
183 level; transfer of the cultures back into light led to the disappearance of the Atp $\Theta$  signal  
184 within less than 4 h (**Figure 2D**). Thus, the time course of Atp $\Theta$  protein accumulation  
185 after transfer of cultures into darkness closely followed the time course of mRNA  
186 accumulation.

187 The inducibility by transfer into darkness might be characteristic of *atpT*  
188 expression and might support the identification of putative homologs in different  
189 species. We chose four species that are phylogenetically distant from *Synechocystis*  
190 6803 (**Figure 1**). *Gloeobacter violaceus* PCC 7421 represents an early-branching  
191 species that lacks thylakoid membranes<sup>28</sup>. *Thermosynechococcus elongatus* BP-1



192 belongs to a clade of unicellular thermophilic strains, while *Prochlorococcus* sp. MED4  
193 is a laboratory isolate representing the vast marine picocyanobacterial genus  
194 *Prochlorococcus*<sup>29</sup>. Finally, *Nostoc* sp. PCC 7120 (*Nostoc* 7120) is a model strain for  
195 the group of heterocyst-differentiating and N<sub>2</sub>-fixing multicellular cyanobacteria. The  
196 predicted Atp $\Theta$  homologs share as little as 12.5% (*Prochlorococcus* sp. MED4), 20.8%  
197 (*G. violaceus* PCC 7421), 33.3 and 41.4% (*T. elongatus* BP-1 and *Nostoc* 7120)  
198 identical amino acids with the *Synechocystis* 6803 protein. The results of Northern  
199 hybridizations showed that the predicted *atpT* homologs in all four strains were  
200 expressed at higher levels after 6 h in darkness than under light conditions (**Figures**  
201 **2E** and **2F**). These findings reinforced the idea that these genes, identified only on the  
202 basis of sequence searches, might be orthologs of the *atpT* gene in *Synechocystis*  
203 6803.

204

### 205 **Atp $\Theta$ localizes in *Synechocystis* 6803 to soluble and membrane-enriched protein** 206 **fractions**

207 Strain P<sub>*atpT*</sub>::*atpT*-3xFLAG was used to localize Atp $\Theta$  within soluble or membrane-  
208 enriched protein fractions. To verify the specificity of the Flag antibody, we also  
209 analyzed strains P<sub>*atpT*</sub>::*atpT* (negative control) and P<sub>*petJ*</sub>::3xFLAG-*sfGFP* (positive  
210 control). *Synechocystis* 6803 extracts from dark- and light-grown cultures were  
211 separated by centrifugation into membrane and soluble fractions and analyzed by  
212 Western blotting. FLAG-tagged proteins were detected in the respective lysates, while  
213 no signal was obtained for the negative control. Atp $\Theta$  was partitioned approximately  
214 equally between the soluble and membrane fractions, while FLAG-tagged sfGFP was  
215 restricted to the soluble fraction (**Figure 3A**). The FLAG tag stabilized the Atp $\Theta$  protein,  
216 since the FLAG-tagged version could be detected in samples from cultures kept under

217 continuous light for 12 h, very different from the native form (**Figures 2C** and **2D**). We  
218 conclude that Atp $\Theta$  can associate with membranes despite the absence of a predicted  
219 membrane-spanning region.

220

## 221 **Fusions to Atp $\Theta$ target GFP to the cyanobacterial thylakoid membrane**

222 According to the fractionation analysis in *Synechocystis* 6803, Atp $\Theta$  localizes to  
223 soluble and membrane-enriched protein fractions, but it remained unclear if only to the  
224 thylakoids, the cellular inner or outer membrane, or several of them. To obtain insight  
225 into the possible subcellular localization of Atp $\Theta$ , we chose *Nostoc* 7120 because of  
226 its much larger cells than *Synechocystis* 6803. TblastN analyses indicated the  
227 presence of a single possible *atpT* homolog in a chromosomal region to which a  
228 transcriptional start site was previously assigned at position 2982087r<sup>30</sup>. Northern  
229 hybridization showed a transcript originating from this region (**Figure 2F**), consistent  
230 with the length of 316 nt predicted for this gene from the TSS to the end of a Rho-  
231 independent terminator<sup>31</sup>. The corresponding gene was classified as protein-coding<sup>31</sup>  
232 based on analysis by the RNAcode algorithm<sup>32</sup>. Upon shifting the cultures to darkness,  
233 this mRNA was rapidly induced (**Figure 2F**), similar to the regulation of the *atpT* gene  
234 in *Synechocystis* 6803 and three other cyanobacteria. Next, two constructs were  
235 prepared: pSAM342 harboring the *atpT* promoter, the corresponding 5'UTR plus the  
236 coding sequence for the green fluorescent protein (GFP) and pSAM344 harboring the  
237 *atpT* promoter, the 5'UTR, and the *atpT* coding region translationally fused to GFP  
238 (**Table S2**).

239 These constructs were introduced into plasmid  $\alpha$  of *Nostoc* 7120 by homologous  
240 recombination. Confocal microscopy revealed GFP fluorescence in the recombinant  
241 strains obtained but not in a strain bearing a *gfp*-less control construct (**Figure 3B**).

242 However, we noticed a distinct difference in the intracellular localization of the signal.  
243 The fluorescence of the cells expressing the transcriptional fusion from construct  
244 pSAM342 appeared distributed throughout the cytoplasm, i.e., typical for a soluble  
245 protein such as GFP (**Figure 3C**). In contrast, the fluorescence of the translational  
246 fusion pSAM344 was localized differently and appeared spatially associated with the  
247 thylakoid membrane system, indicated by the overlap between chlorophyll and GFP  
248 fluorescence signals (**Figure 3D**). We conclude that translational fusions between *atpT*  
249 and *gfp* were translated well and that the Atp $\Theta$  sequence was competent to direct GFP  
250 to the thylakoid membrane. This localization is consistent with the association of  
251 soluble Atp $\Theta$  with a thylakoid membrane-bound complex.

252 Interestingly, for both constructs, the signal was very low in those cells that  
253 exhibited no chlorophyll fluorescence (compare **Figure 3B** with **Figures 3C** and **3D**).  
254 These cells were heterocysts specialized for nitrogen fixation, the assimilation of  
255 nitrogen from dinitrogen gas, N<sub>2</sub>, through the enzyme nitrogenase. This result provided  
256 evidence that the *atpT* promoter was switched off cell type-specifically in heterocysts.

257

### 258 **ATP synthase subunits become enriched in coimmunoprecipitation experiments**

259 To identify the function of Atp $\Theta$ , protein coimmunoprecipitation assays followed by  
260 mass spectrometry were conducted with protein extracts from *Synechocystis* 6803  
261 cells expressing FLAG-tagged Atp $\Theta$  under the control of its native promoter (strain  
262 P<sub>*atpT*</sub>::*atpT*-3xFLAG). As controls, a strain expressing untagged Atp $\Theta$  under control of  
263 the native promoter (strain P<sub>*atpT*</sub>::*atpT*) and a strain expressing FLAG-tagged sfGFP  
264 controlled by the copper-regulated P<sub>*petJ*</sub> promoter (strain P<sub>*petJ*</sub>::3xFLAG-sf*gfp*) were  
265 used.

266 The evaluation of pull-down experiments via mass spectrometry showed that 34  
267 proteins, including eight subunits of F<sub>o</sub>F<sub>1</sub> ATP synthase, were enriched with a  
268 log<sub>2</sub>FC >3.5 among the proteins copurified with FLAG-tagged AtpΘ compared to at  
269 least one of the two controls (**Table S4**). These results pointed at a possible interaction  
270 between AtpΘ and one or several subunits of the F<sub>o</sub>F<sub>1</sub> ATP synthase complex.

271 Two experiments were performed to verify this possibility. We performed a  
272 second immunoprecipitation assay comparing FLAG-tagged AtpΘ and FLAG-tagged  
273 sfGFP in three biological replicates each. The eluted samples were subjected to SDS-  
274 PAGE (**Figure S2**) and then analyzed using mass spectrometry. This analysis  
275 detected the same eight subunits of ATP synthase that were significantly enriched by  
276 coimmunoprecipitation with AtpΘ-3xFLAG (**Figure 4A**, marked in red), confirming the  
277 specific interaction between AtpΘ and the ATP synthase complex. Hence, in both  
278 analyses, the same 8 of the 9 known ATP synthase subunits were identified (**Tables**  
279 **S4** and **S5**). The only missing subunit was subunit c, the small membrane-intrinsic  
280 subunit, which appears to be difficult to detect by mass spectrometry. A small number  
281 of additional proteins significantly enriched by coimmunoprecipitation with AtpΘ-  
282 3xFLAG included two subunits of NAD(P)H-quinone oxidoreductase (subunit I and  
283 subunit O), two proteins of the CmpABCD transporter (CmpC and CmpA), and the  
284 bicarbonate transporter SbtA (**Figure 4B**), pointing at possible higher-order structures  
285 or additional binding partners of AtpΘ. The hierarchical clustering of AtpΘ-3xFLAG-  
286 enriched proteins labeled in **Figures 4A** and **4B**, as well as 3xFLAG-sfGFP is shown  
287 in **Figure 4C**. The resulting heat map further helped to visualize the enrichment of each  
288 protein, and the blank region under the 3xFLAG-sfGFP cluster indicates that no such  
289 proteins were identified. The complete dataset of the two independent

290 coimmunoprecipitation assays can be obtained from the PRIDE partner repository  
291 (dataset identifiers PXD020126 and PXD024905).

292 As a further control experiment, we tested the enrichment of AtpB (subunit beta  
293 of ATP synthase) in an eluate from the pull-down experiment with FLAG-tagged Atp $\Theta$   
294 by Western blotting. AtpB was clearly detected in this eluate but not in the eluate from  
295 the immunoprecipitation of 3xFLAG-sfGFP or a mock experiment with untagged Atp $\Theta$   
296 (**Figure 4D**). Collectively, these results supported an interaction between Atp $\Theta$  and  
297 subunit(s) of the ATP synthase complex. Moreover, this interaction would explain the  
298 association of Atp $\Theta$  with thylakoid membranes as was observed in **Figure 3**.

299

### 300 **Impact of Atp $\Theta$ on ATP synthase activity**

301 The results in **Figure 3** showed that Atp $\Theta$  associates with thylakoid membranes  
302 and the results in **Figure 4** that it is the ATP synthase complex it is interacting with. To  
303 test its functional impact, the *atpT* gene was replaced by a chloramphenicol resistance  
304 cassette and biochemical measurements of ATPase activity were performed.  
305 Membrane fractions were isolated from both the wild type and the fully segregated *atpT*  
306 knockout strain (**Figure S1D**), which had been kept in continuous light or dark, and  
307 their ATP hydrolysis activities were analyzed. The results (**Figure 5A**) showed that the  
308 membrane fraction of wild-type *Synechocystis* 6803 grown in the light had a  
309 significantly higher ATPase activity than the membrane fraction isolated after 24 h of  
310 darkness incubation. In contrast, the membrane preparation from the knockout strain  
311 without Atp $\Theta$  showed no significant difference between the light- and dark-incubated  
312 conditions. These results suggested an *in vivo* inhibitory effect of Atp $\Theta$  on ATPase  
313 activity under darkness.

314 Similar findings were observed in a second cyanobacterium,  
315 *Thermosynechococcus elongatus* BP-1, where the ATPase activities of the membrane  
316 samples prepared from light-cultivated cells were significantly higher than the ATPase  
317 activities of the membrane samples from dark-incubated cells (**Figure S3**). Thus, the  
318 predicted Atp $\Theta$  homolog of *Thermosynechococcus elongatus* BP-1 could function  
319 similarly to Atp $\Theta$  of *Synechocystis* 6803.

320 To further characterize the potential inhibitory effect of Atp $\Theta$ , the ATP hydrolysis  
321 activity of the membrane fraction from wild-type *Synechocystis* 6803 cells was  
322 measured in the presence of different amounts of an Atp $\Theta$  synthetic peptide (**Figure**  
323 **5B**). The synthetic peptide AcnSP<sup>33</sup>, which is of a length similar to Atp $\Theta$  and was  
324 synthesized by the same company, was used as negative control. In parallel, the well-  
325 established F<sub>o</sub>F<sub>1</sub> ATP synthase inhibitor DCCD served as positive control. As shown  
326 in **Figure 5B**, Atp $\Theta$  reduced ATPase activity in a dose-dependent manner, and the  
327 inhibitory effect was saturated at 20 nmol Atp $\Theta$ , whereas the AcnSP peptide showed  
328 no effect on ATPase activity. High amounts of DCCD inhibited ATPase activity at a  
329 level similar to the Atp $\Theta$  peptide. Finally, the combination of DCCD and Atp $\Theta$  peptide  
330 yielded an ATPase inhibition similar to their separate addition. These results indicated  
331 that Atp $\Theta$  is a strong inhibitor of the ATP hydrolysis activity of F<sub>o</sub>F<sub>1</sub> ATP synthase,  
332 comparable to DCCD. The remaining 60% ATP hydrolysis activity of the membrane  
333 preparations probably resulted from other ATP hydrolases, such as H<sup>+</sup>-translocating  
334 P-type ATPases that are resistant to DCCD or PilT1 and PilB1 proteins providing  
335 energy for the type IV pili system<sup>34,35</sup>, or because either Atp $\Theta$  or DCCD cannot fully  
336 inhibit ATPase activity. Then, to further confirm whether the difference between wild-  
337 type and knockout cells observed in **Figure 5A** was due to the lack of Atp $\Theta$ , 20 nmol  
338 of Atp $\Theta$  or AcnSP peptides was supplemented to the membrane isolated from the dark-

339 incubated knockout strain. The results showed that supplementation with Atp $\Theta$  could  
340 significantly inhibit the ATPase activity of the membrane, while AcnSP showed no such  
341 effects (**Figure 5C**), further confirming the inhibitory role of Atp $\Theta$ .

342 To identify the minimal inhibitory sequence of Atp $\Theta$  and to study the effects of  
343 specific amino acids on the ATPase inhibitory effect of Atp $\Theta$ , four mutant Atp $\Theta$   
344 peptides were designed and synthesized (**Figure S4**). The inhibitory effects of these  
345 peptides on ATPase activity were tested and compared to the inhibitory effects of the  
346 original Atp $\Theta$  peptide (**Figure 5D**). Interestingly, the N-terminal part of Atp $\Theta$ , which  
347 corresponds to the predicted alpha-helical part of this protein (peptide Atp $\Theta$ \_N in  
348 **Figure 5D** and **Figure S4**), exhibited an inhibitory effect similar to that of the entire  
349 peptide. In contrast, the central part of Atp $\Theta$  (Atp $\Theta$ \_C in **Figure 5D** and **Figure S4**)  
350 showed weaker inhibitory effects. Introduction of two conserved amino acid  
351 substitutions (D26E and D27E) yielded Atp $\Theta$ \_EE, as shown in **Figure 5D** and **Figure**  
352 **S4**. Consistent with the conservative replacement of two acidic residues by two others,  
353 a similar inhibitory effect on ATP hydrolysis activity was observed as for the native  
354 Atp $\Theta$  protein. In contrast, the introduction of a single histidine residue at this position  
355 (E27H; Atp $\Theta$ \_H in **Figure 5D** and **Figure S4**) led to an almost complete loss of the  
356 inhibitory effect, indicating that the negative charge at this position is important for the  
357 inhibitory activity of the full-length Atp $\Theta$  peptide. The 3D structure modeling of Atp $\Theta$   
358 using PEP-FOLD3<sup>36</sup> and analysis using the HELIQUEST web server<sup>37</sup> predicted an N-  
359 terminal amphipathic alpha helix and a C-terminal random structure, which was also  
360 observed in the predicted structures of representative Atp $\Theta$  homologs from  
361 cyanobacteria strains with one, two or three putative homologs (**Figure S5**). These  
362 results suggest that the N-terminal alpha helix of Atp $\Theta$  is a conserved structural

363 element that is together with the cluster of centrally located, negatively charged amino  
364 acids responsible for the inhibition of ATPase activity.

365

### 366 **F<sub>0</sub>F<sub>1</sub> ATP synthase purification and the effect of Atp $\Theta$**

367 To rule out the effects of membrane proteins other than ATP synthase, ATP synthase  
368 was purified from *Synechocystis* 6803 cells by fusing a 3xFLAG tag to the C-terminus  
369 of AtpB. The purified protein complex was first characterized by SDS-PAGE, showing  
370 good purity and distribution of different subunits (**Figure 6A**), and then probed using  
371 anti-FLAG and anti-AtpB antisera (**Figures 6B** and **6C**, respectively), confirming the  
372 presence of both 3xFLAG and AtpB. The ATPase activity of the purified ATP synthase  
373 was then measured directly or in the presence of different inhibitors (**Figure 6D**). ATP  
374 hydrolysis activity was detected using the purified protein complex. Compared with the  
375 purified complex, the addition of AcnSP peptide yielded no significant changes,  
376 whereas the addition of Atp $\Theta$  peptide or DCCD significantly decreased the ATPase  
377 activity. The inhibitory effect of Atp $\Theta$  appeared stronger than the inhibitory effect of  
378 DCCD, and the combination of both showed no additive effects. These results further  
379 confirmed the inhibitory effect of the Atp $\Theta$  peptide on the hydrolytic activity of ATP  
380 synthase.

381

### 382 **Far Western blot identifies interaction partners of Atp $\Theta$ from purified ATP** 383 **synthase**

384 To gain further insight into the interaction between Atp $\Theta$  and the ATP synthase  
385 complex, a far Western blot approach<sup>38</sup> was applied. In this approach, proteins were  
386 renatured after blotting onto a membrane and served as baits. The membrane was



387 then incubated with the synthetic Atp $\Theta$  peptide, followed by anti-Atp $\Theta$  serum and anti-  
388 rabbit IgG antiserum. As shown in **Figure 6E-G**, Atp $\Theta$  was enriched mainly at two  
389 positions, which were assigned as subunit a (*atpB*, S111322) and subunit c (*atpE*,  
390 S12615), respectively, based on the comparison to the subunit distribution of *E. coli*  
391 F<sub>0</sub>F<sub>1</sub> ATP synthase<sup>39</sup>. A very weak signal of approximately 50 kDa size was also  
392 observed, which should correspond to subunit alpha or subunit beta (**Figure 6G**).  
393 Although the 50 kDa signal was relatively weak, it was reproducibly observed (n = 3)  
394 and should therefore also be considered. As a negative control, a mock far Western  
395 blot was conducted in which TBST buffer was used instead of the synthetic Atp $\Theta$   
396 peptide. In this setting, no signal was observed for the two replicates of ATP synthase  
397 purification, while the positive controls could be detected (**Figure S6**), suggesting that  
398 none of the signals observed in **Figures 6E and 6G** were due to unspecific interaction  
399 with any of the antisera used. These results further confirmed the specific interaction  
400 of the Atp $\Theta$  peptide with distinct subunits of ATP synthase.

401

## 402 **Discussion**

403 F<sub>0</sub>F<sub>1</sub>-type ATP synthases produce ATP via chemiosmotic coupling to a proton gradient.  
404 However, while ATP synthases preferentially catalyze ATP formation, a weaker or  
405 temporarily missing proton gradient can stimulate the reverse reaction, pumping  
406 protons while hydrolyzing ATP. In the mitochondria of yeast and mammals, small  
407 inhibitory peptides can prevent ATP synthase from running backwards, hence avoiding  
408 wasteful ATP hydrolysis. In plant chloroplasts, in which the proton gradient is  
409 generated by light-driven photosynthetic electron transport, a redox-controlled  
410 mechanism switches ATP synthase activity off at night when photosynthesis does not  
411 take place<sup>1</sup>. In this respect, cyanobacteria present an interesting case because

412 photosynthetic ATP synthesis is light-driven, as in chloroplasts, but conditions can  
413 easily be envisioned where inhibition of ATP hydrolysis is warranted. Such conditions  
414 can be low light, darkness and others that would affect the strength of the proton  
415 gradient. Cellular ATP demand is likely considerably lower under certain conditions,  
416 e.g., during the night, but in contrast to chloroplasts, residual activity should be  
417 maintained in cyanobacteria to allow respiration to proceed with ATP synthesis, which  
418 uses the same ATP synthase that is also used for photosynthesis in the thylakoid  
419 membrane system.

420         Several mechanisms have been identified for regulating ATP synthase activity  
421 in cyanobacteria (**Figure 7**). A common regulatory mechanism, the ADP-mediated  
422 inhibition of the  $F_1$  part, has been reported for cyanobacterial ATPase<sup>20</sup>. Although the  
423  $\gamma$  subunit of cyanobacteria is not redox-sensitive compared to the chloroplast  $F_0F_1$  ATP  
424 synthase subunit  $\gamma$ , the ADP-mediated inhibition of ATPase was assigned to this  
425 subunit<sup>20</sup>. Another well-characterized mechanism is the inhibition of the rotation of  
426 bacterial  $F_0F_1$  ATP synthase via the  $\epsilon$  subunit, called  $\epsilon$  inhibition<sup>40</sup>.  $\epsilon$  inhibition in  
427 cyanobacteria was reported to be ATP-independent, different from other bacteria, and  
428 was related to the distinct  $\gamma$  subunit of cyanobacteria as well<sup>41</sup>. In addition, both the  $\gamma$   
429 and  $\epsilon$  subunits of cyanobacterial  $F_0F_1$  ATP synthase were reported to be important for  
430 the dark acclimation of cyanobacteria<sup>21</sup>. However, many aspects of the regulation of  
431 cyanobacterial  $F_0F_1$  ATP synthase have remained unknown.

432         In the present study, we suggest that the small protein Atp $\Theta$  represents a  
433 functional analog in cyanobacteria of the small inhibitory peptides that arrest ATP  
434 synthase from running backwards in mitochondria. This hypothesis is supported by  
435 several lines of evidence. First, the direct interaction of Atp $\Theta$  with ATP-synthase  
436 subunits has been shown in different protein/protein interaction studies, where it

437 showed the strongest binding toward subunit a (*atpB*, Sll1322) and subunit c (*atpE*,  
438 Ssl2615) (**Figure 6G**). Second, Atp $\Theta$  supplementation had a specific, dose-dependent  
439 negative impact on ATP hydrolysis activity in isolated membrane fractions or using the  
440 purified ATP synthase complex. The extent of this inhibition was similar to the inhibition  
441 exerted by specific ATP synthase inhibitors, consistent with its role in preventing the  
442 reverse reaction, i.e., the wasting of ATP via hydrolysis when the proton gradient is  
443 weakened. The addition of synthetic Atp $\theta$  peptide to the membrane samples prepared  
444 from *Synechocystis* 6803 cultured in the presence of light yielded a maximum 35%  
445 inhibition of ATPase activity (**Figure 5B**). A slightly higher inhibitory effect of 40% was  
446 achieved if Atp $\theta$  peptide was added to the preparations of purified ATP synthase  
447 (**Figure 6D**). These findings indicate that the Atp $\theta$  peptide may inhibit up to 40% of the  
448 ATPase activity in ATP synthase. Third, investigations of wild type and *atpT* mutant  
449 strains are consistent with the *in vitro* ATP synthase activity tests. While the membrane  
450 sample prepared from *Synechocystis* 6803 cultured under continuous light showed a  
451 similar ATPase activity as previously reported<sup>21</sup>, the membrane samples prepared from  
452 dark-incubated *Synechocystis* 6803 with maximum *atpT* expression showed an  
453 ATPase activity of approximately 85% (**Figure 5A**), and this difference was not  
454 observed in the *atpT* knock-out mutant of *Synechocystis* 6803, indicating that the Atp $\theta$   
455 protein is required *in vivo* to decrease ATPase activity during dark incubation. Fourth,  
456 the expression data suggest that the Atp $\Theta$  action is controlled mostly via the regulation  
457 of its expression because the protein seems to have a low stability (**Figure 2D**). Its  
458 expression is particularly stimulated under conditions that could weaken the  
459 transmembrane proton gradient, such as darkness, or, in our experiments, by the  
460 addition of the uncoupler CCCP or the electron chain inhibitor DBMIB (**Figure 2B**).  
461 While CCCP is a well-established protonophore, DBMIB is better known as an inhibitor

462 of photosynthetic electron transfer. However, DBMIB affects the cytochrome *b<sub>6</sub>f*  
463 complex<sup>27</sup>, which is shared by photosynthetic and respiratory electron transfer that  
464 operates in the same membrane system in cyanobacteria. In contrast, the presence of  
465 Atp $\Theta$  might be futile when ATP synthase runs at high speed, such as under high-light  
466 conditions driven by an efficient photosynthetic light reaction or in the presence of high  
467 rates of respiration. Consistently, *atpT* dark induction could largely be prevented by the  
468 addition of glucose (**Figure 2A**), likely due to the stimulation of respiration-dependent  
469 ATP synthesis in the presence of glucose. Furthermore, such a scenario of high  
470 respiration exists in heterocysts, which have no photosystem II but exhibit substantial  
471 ATP production to meet the high demand of nitrogen-fixing nitrogenase, linked to high  
472 rates of respiration consuming the O<sub>2</sub> inside the heterocysts. Indeed, we observed that  
473 the expression of the *atpT* promoter was shut down in heterocysts of *Nostoc* 7120  
474 (**Figure 3C** and **3D**). Finally, the cross-phylum importance of the Atp $\Theta$ -mediated  
475 prevention of the backward reaction of ATP synthase is supported by its ubiquitous  
476 occurrence throughout the cyanobacterial phylum and our finding that *atpT* expression  
477 was stimulated under conditions leading to lowered thylakoid proton gradients in  
478 several divergent species of cyanobacteria (**Figure 2E** and **2F**). These results make it  
479 very likely that the conclusions obtained with the model *Synechocystis* 6803 can also  
480 be generalized for other cyanobacteria.

481 Collectively, these data provide evidence that the small protein Atp $\Theta$  acts as an  
482 ATP hydrolysis inhibitor of cyanobacterial ATP synthase. This role of Atp $\Theta$  represents  
483 an interesting analogy to the ATP synthase regulator IF1 in the mitochondria of  
484 eukaryotes. However, unlike IF1, which binds the catalytic interface between the  $\alpha$  and  
485  $\beta$  subunits<sup>42</sup>, the main potential interaction partners of Atp $\Theta$ , subunits a and c, belong  
486 to the F<sub>0</sub> part of ATP synthase, which resides within the thylakoid membrane (**Figure**

487 7). The predicted amphipathic character of the N-terminal helix in Atp $\Theta$  homologs  
488 (**Figure S5C**) may support the interaction with membrane proteins such as subunits a  
489 and c but may facilitate also additional interactions with subunits in the soluble phase.  
490 Therefore, the binding of Atp $\Theta$  to the two topographically close subunits a and c and  
491 its amphipathic character point to a possibly divergent mechanism of Atp $\Theta$  function by  
492 hindering the rotation of the ATP synthase complex through direct binding.

493

#### 494 **Acknowledgments**

495 This study was funded by the German Research Foundation (DFG) priority program  
496 SPP2002 “Small Proteins in Prokaryotes, an Unexplored World” (grant HE 2544/12-1  
497 to WRH, grant HA 2002/22-1 to MH and grant BE 3869/5-1 to DöB), by grant PID2019-  
498 105526GB-I00/AEI/10.13039/501100011033 (AEI/FEDER, UE) to AMMP, and by a  
499 China Scholarship Council grant to K.S. We thank the ZBSA proteomics staff,  
500 especially Verónica I. Dumit, for support, Gen Enomoto, for an aliquot of  
501 *Thermosynechococcus elongatus* BP1, Mai Watanabe for an aliquot of *Gloeobacter*  
502 *violaceus* PCC 7421 and Claudia Steglich for a culture of *Prochlorococcus* sp. MED4  
503 (all University of Freiburg).

504

#### 505 **Author contributions**

506 KS and DeB carried out the molecular-genetic and biochemical analyses in  
507 *Synechocystis* 6803, and AMMP performed all experiments in *Nostoc* 7120. SM and  
508 DöB performed proteomics analyses. MH provided scientific input for improving the  
509 experimental design and physiological interpretation. WRH designed the study, and all

510 authors analyzed the data. KS and WRH drafted the manuscript. All authors read and  
511 approved the final manuscript.

512

513 **Declaration of interests**

514 The authors declare that they have no competing interests.

515

## Main text Figures

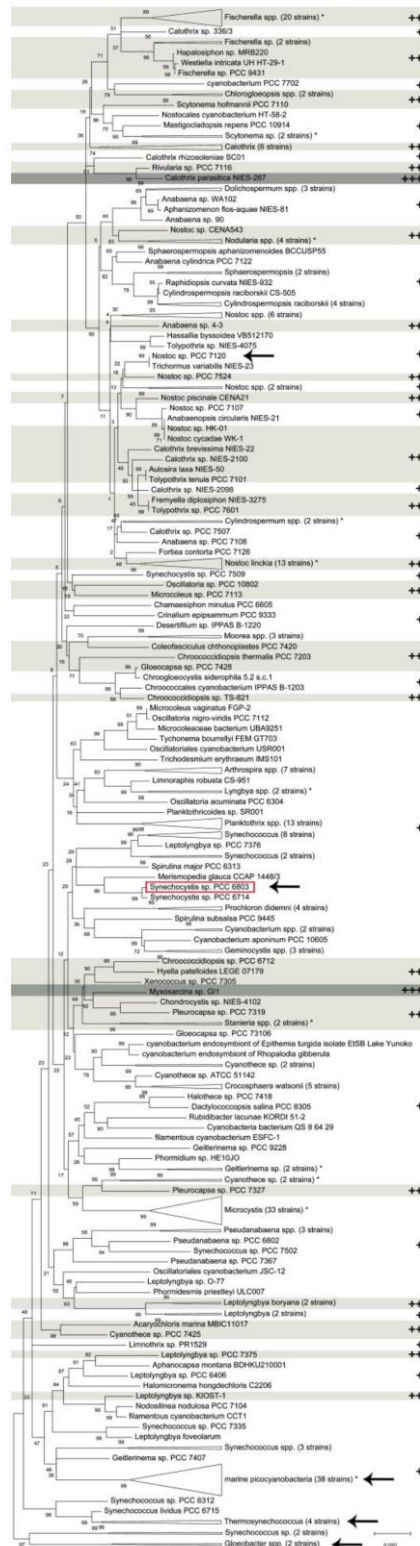

516

**Figure 1. Distribution and numbers of *atpT* genes throughout the cyanobacterial phylum.** Phylogenetic tree of cyanobacteria based on 16S rRNA sequences (SILVA database<sup>43</sup> constructed in MEGAX<sup>44</sup> using the minimum evolution method<sup>45</sup>). The number of individual strains is given in brackets if several strains were joined at one

branch (e.g., 33 strains for *Microcystis*), marine picocyanobacteria consisting of *Prochlorococcus* and marine *Synechococcus*. The numbers of putative *atpT* homologs in each strain are indicated (+, one; ++, two; +++, three homologs) and additionally highlighted in shades of gray if more than one. Single deviations within clusters of strains joined at one branch are labeled by asterisks (e.g., among the 20 *Fischerella* spp. strains in the uppermost cluster is one strain with one homolog, while all others have two). Species selected for experimental analyses in this study are labeled by arrows, and the location of the *Synechocystis* 6803 model strain is additionally highlighted by a red box. The optimal tree with the sum of branch length = 5.06878059 is shown. The percentage of replicate trees in which the associated taxa clustered together in the bootstrap test (500 replicates) is shown next to the branches<sup>46</sup>. The tree is drawn to scale, with branch lengths in the same units as the units of the evolutionary distances used to infer the phylogenetic tree. The analysis involved 318 nucleotide sequences. All ambiguous positions were removed for each sequence pair (pairwise deletion option). There were a total of 1753 positions in the final dataset. The sequences of all potential Atp $\Theta$  homologs are given in **Table S1**.

517



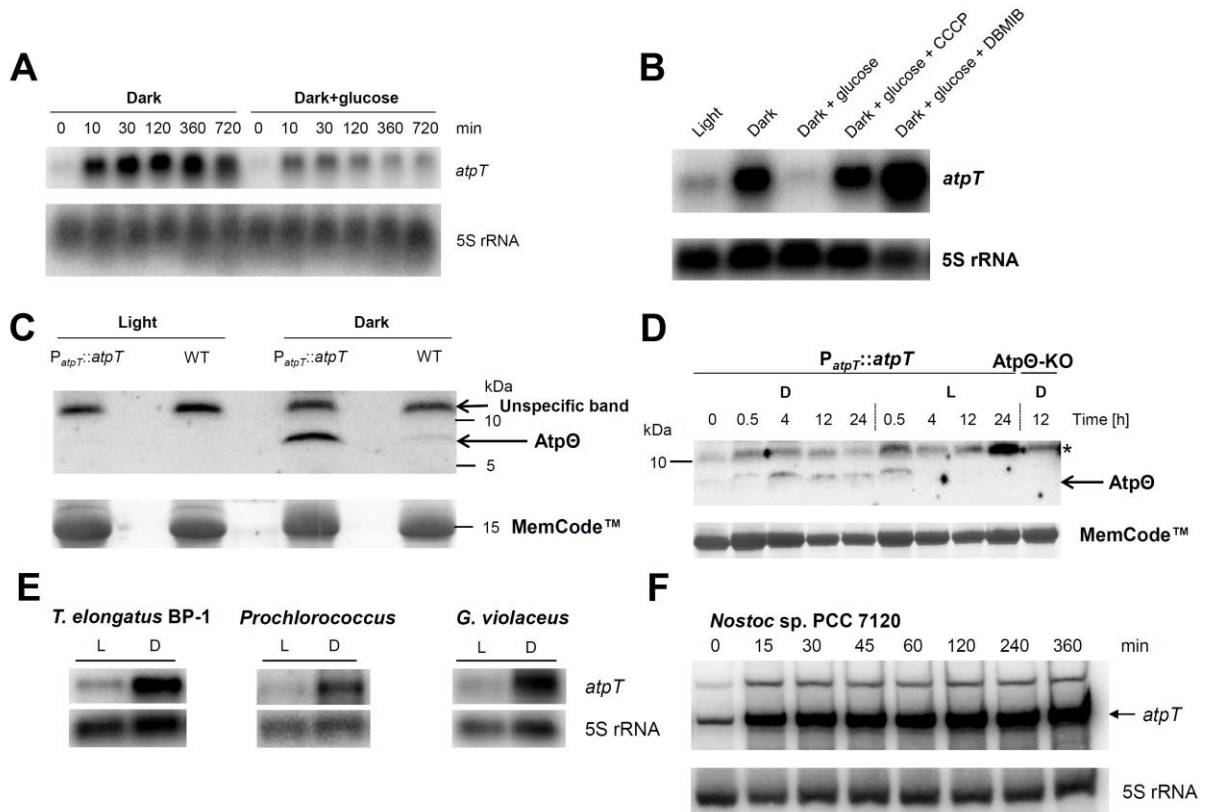

**Figure 2. Expression of *atpT* is stimulated by low energy, uncoupling or inhibition of electron transfer. (A)** Time course of *atpT* mRNA accumulation in the dark in the presence or absence of glucose (10 mM). Exponentially growing *Synechocystis* 6803 wild-type (WT) cells were harvested at the indicated time points before and after transfer to darkness. Northern hybridization was carried out after separation and blotting of 1  $\mu$ g of total RNA with a  $^{32}$ P-labeled, single-stranded transcript probe specifically recognizing *atpT*. **(B)** *atpT* mRNA accumulation after 6 h under the indicated conditions and treatments. CCCP and DBMIB were added to final concentrations of 10  $\mu$ M and 100  $\mu$ M, respectively. **(C)** Western blot experiment for the detection of native Atp $\Theta$ . Protein levels were compared in *Synechocystis* 6803 WT cells and in cultures carrying the  $P_{atpT}::atpT$  construct in which the untagged *atpT* gene was overexpressed from its native promoter on the plasmid vector pVZ322 in addition to the native gene copy. Identical amounts of 150  $\mu$ g total protein were separated by Tricine SDS-PAGE<sup>47</sup> and probed with anti-Atp $\Theta$  serum after transfer to nitrocellulose membrane. Precision Plus Protein™ DualXtra (2-250 kDa, Bio-Rad) was used as molecular mass marker. The same membrane was stained with MemCode™ as a loading control. **(D)** Atp $\Theta$  expression under changing light conditions. Samples for protein extraction were collected at the indicated time points. Approximately 150  $\mu$ g (calculated according to Direct Detect™ Spectrometer measurements) of protein samples was separated. PageRuler™ Prestained Protein Ladder (10–170 kDa, Fermentas) was used as molecular mass marker. MemCode™ staining served as a loading control. D, darkness, L, standard light ( $\sim 40$   $\mu$ mol photons  $m^{-2} s^{-1}$ ), Atp $\Theta$ -KO, Atp $\Theta$  knockout (only last lane). In panels **(C)** and **(D)**, the position of untagged Atp $\Theta$  is indicated, \* indicates a strong cross-reacting band. **(E)** Northern analysis of potential

*atpT* homologs in *Thermosynechococcus elongatus* BP-1, *Prochlorococcus* sp. MED4, and *Gloeobacter violaceus* PCC 7421. For each sample, 5 µg of total RNA was loaded. L, strains were cultured in constant light; D, light-cultured strains were incubated in darkness for 6 h. **(F)** Time course of *atpT* mRNA accumulation in *Nostoc* 7120 in cultures transferred from light to darkness for the indicated times. In panels (A), (B), (E) and (F) the respective 5S rRNA was hybridized as a loading control.

518

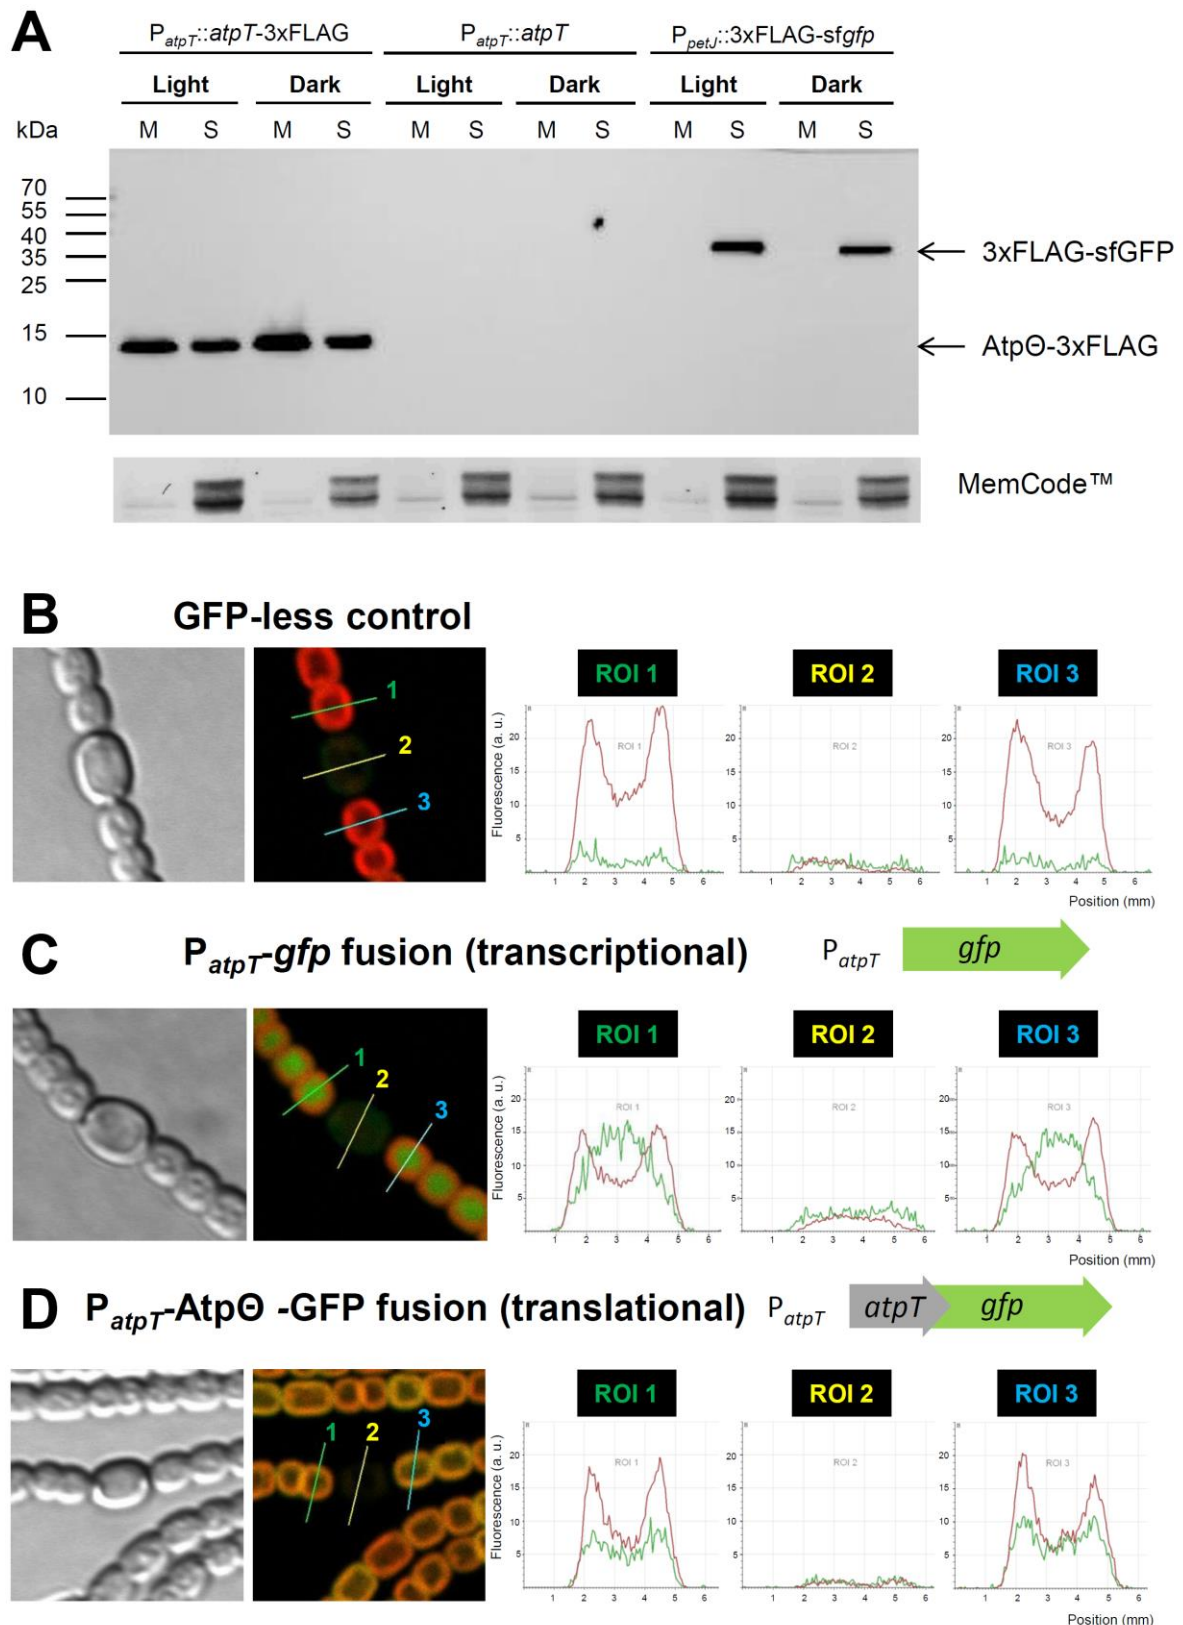

**Figure 3. Intracellular localization of Atp $\Theta$ .** (A) Localization of FLAG fusion proteins by separation of the membrane fraction from soluble proteins. Samples for protein extraction were taken from light- and dark (12 h incubation)-grown cultures of *Synechocystis* 6803 mutant strains:  $P_{atpT}::atpT-3xFLAG$  and  $P_{petJ}::3xFLAG-sfgfp$  expressed the recombinant Atp $\Theta$  and Gfp-FLAG fusion proteins, respectively, whereas

$P_{atpT}::atpT$  was used as a negative control. Proteins (10  $\mu$ g) were separated on a 15% (w/v) glycine SDS polyacrylamide gel and transferred to a nitrocellulose membrane, which was probed with specific ANTI-FLAG® M2-Peroxidase (HRP) antibody. MemCode™ Reversible Protein staining was used to check for equal protein loading. M, membrane fraction, S, soluble fraction. **(B) to (D)** Fluorescence-based analysis of the localization of Atp $\Theta$  in *Nostoc* 7120 bearing different fusions to GFP. **(B)** GFP-less control. **(C)** Transcriptional fusion: The *gfp* gene was placed under the control of the *atpT* promoter (construct pSAM342, **Table S2**). **(D)** Translational fusion: The *gfp* gene was fused to the *atpT* coding region and placed under the control of the *atpT* promoter (pSAM344, **Table S2**). In panels **(B)** to **(D)**, first, light transmission microscopy is shown, followed by fluorescence in the GFP channel merged with chlorophyll autofluorescence. The following three diagrams show the fluorescence intensities in cross sections region of interest (ROI) 1 to ROI 3 in three consecutive single cells, two vegetative cells and one heterocyst in the middle. GFP fluorescence is depicted in green, and chlorophyll autofluorescence is depicted in red.

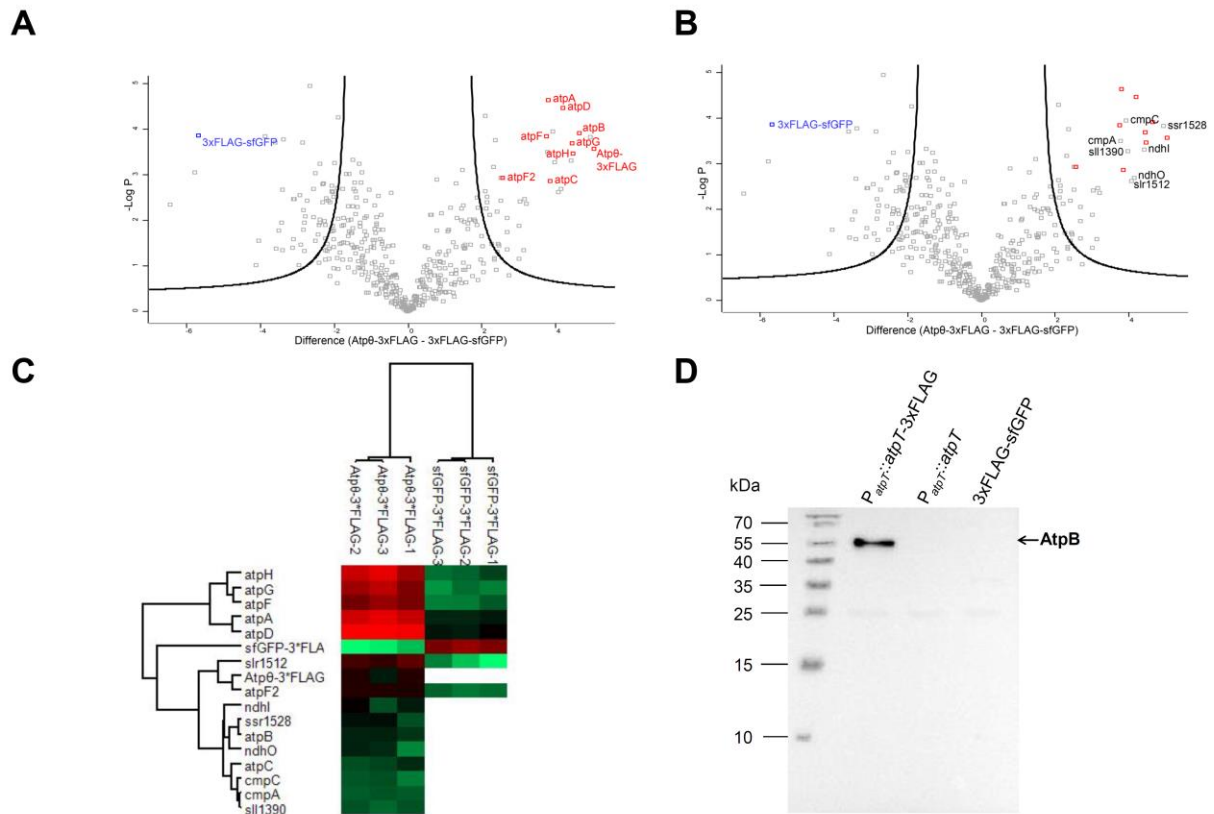

**Figure 4. Copurification of Atp $\theta$  and the ATP synthase complex verified by mass spectrometry and immunoblot analysis. (A)** Volcano plot generated based on a two-sample *t*-test of enriched proteins using a false discovery rate (FDR) of 0.01 and a coefficient for variance minimization  $s_0$ <sup>48</sup> of 2. Atp $\theta$ -3xFLAG and the identified subunits of F<sub>0</sub>F<sub>1</sub> ATP synthase are marked in red, while 3xFLAG-GFP is marked in blue. Subunit b' (AtpF2) was added manually to the plot since this subunit was detected in only 2 out of 3 replicates. **(B)** The same volcano plot shown in **(A)** labeled with non-ATP synthase proteins. **(C)** Clustering heat map of the Atp $\theta$ -3xFLAG-enriched proteins marked in volcano plots **(A)** and **(B)**. The log<sub>2</sub> transformed NSAF intensities are indicated by different colors as indicated below. Undetected proteins in the 3xFLAG-GFP-enriched samples were left blank. 3xFLAG-GFP was detected in the Atp $\theta$ -3xFLAG group due to their common 3xFLAG tag. **(D)** Probing the elution fractions of P<sub>*atpT*</sub>::*atpT*-3xFLAG, P<sub>*atpT*</sub>::*atpT* and P<sub>*petJ*</sub>::3xFLAG-*sfgfp* with anti-AtpB serum.

520

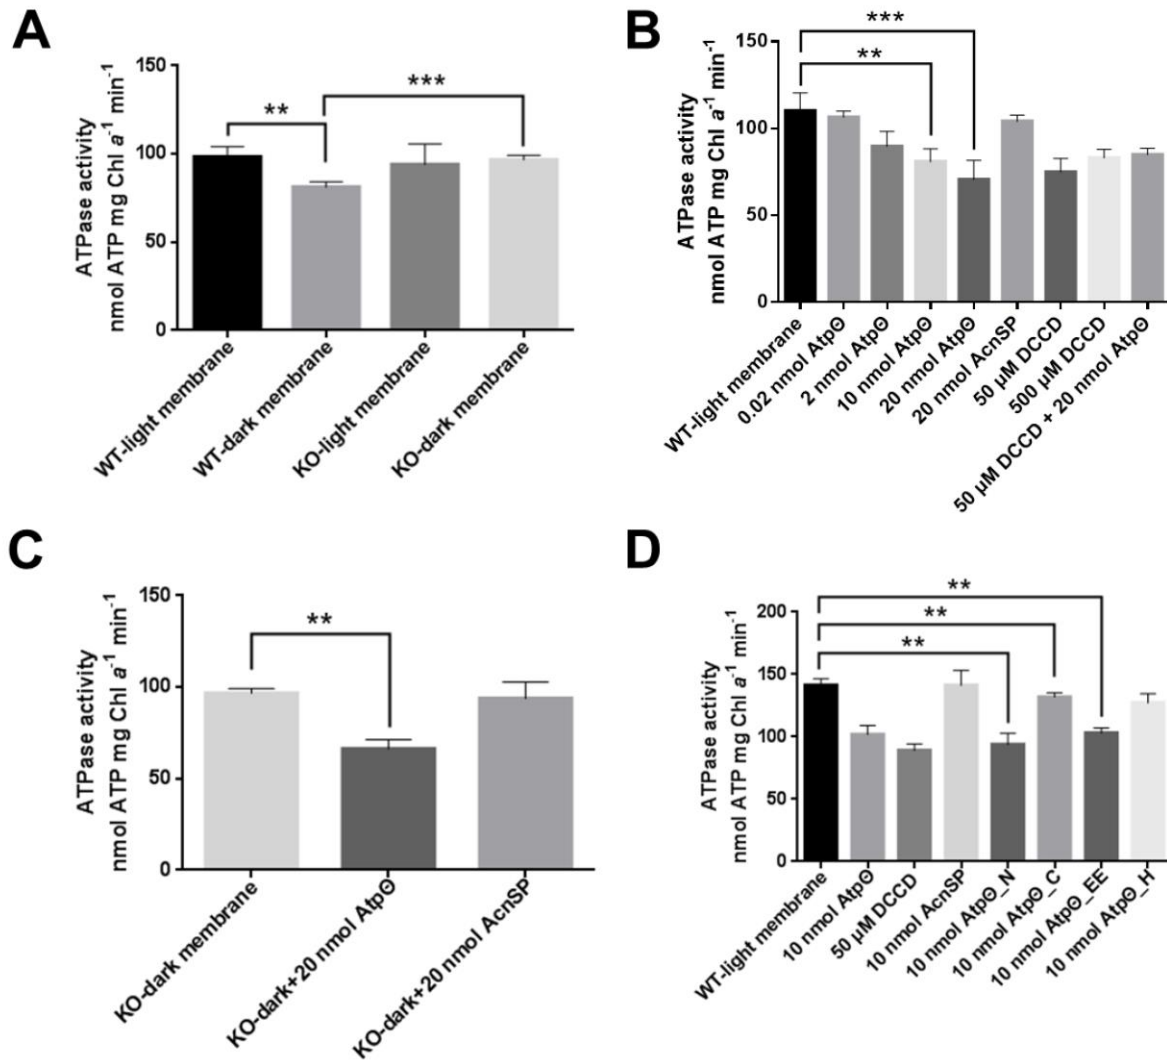

**Figure 5. ATPase activities in membrane fractions. (A)** ATPase activity of the membrane fraction of wild type and *atpT* knockout *Synechocystis* 6803 cells growing under continuous light or after 24 hours of darkness incubation. **(B)** ATPase activity of the membrane fraction of wild-type *Synechocystis* 6803 supplemented with different synthetic peptides or chemicals. DCCD was used as a positive control for ATPase activity inhibition, while the synthetic AcnSP peptide was used as a negative control. **(C)** ATPase activity of the membrane fraction isolated from *atpT* knockout *Synechocystis* 6803 cells after 24 hours of darkness incubation supplemented with either synthetic Atpθ or AcnSP peptide. **(D)** ATPase inhibitory effects of Atpθ peptides with truncated or modified sequences (**Figure S4**). The differences between groups were tested using GraphPad software as described in the methods section. Significance was established at  $P < 0.05 = **$  and  $P < 0.01 = ***$ .

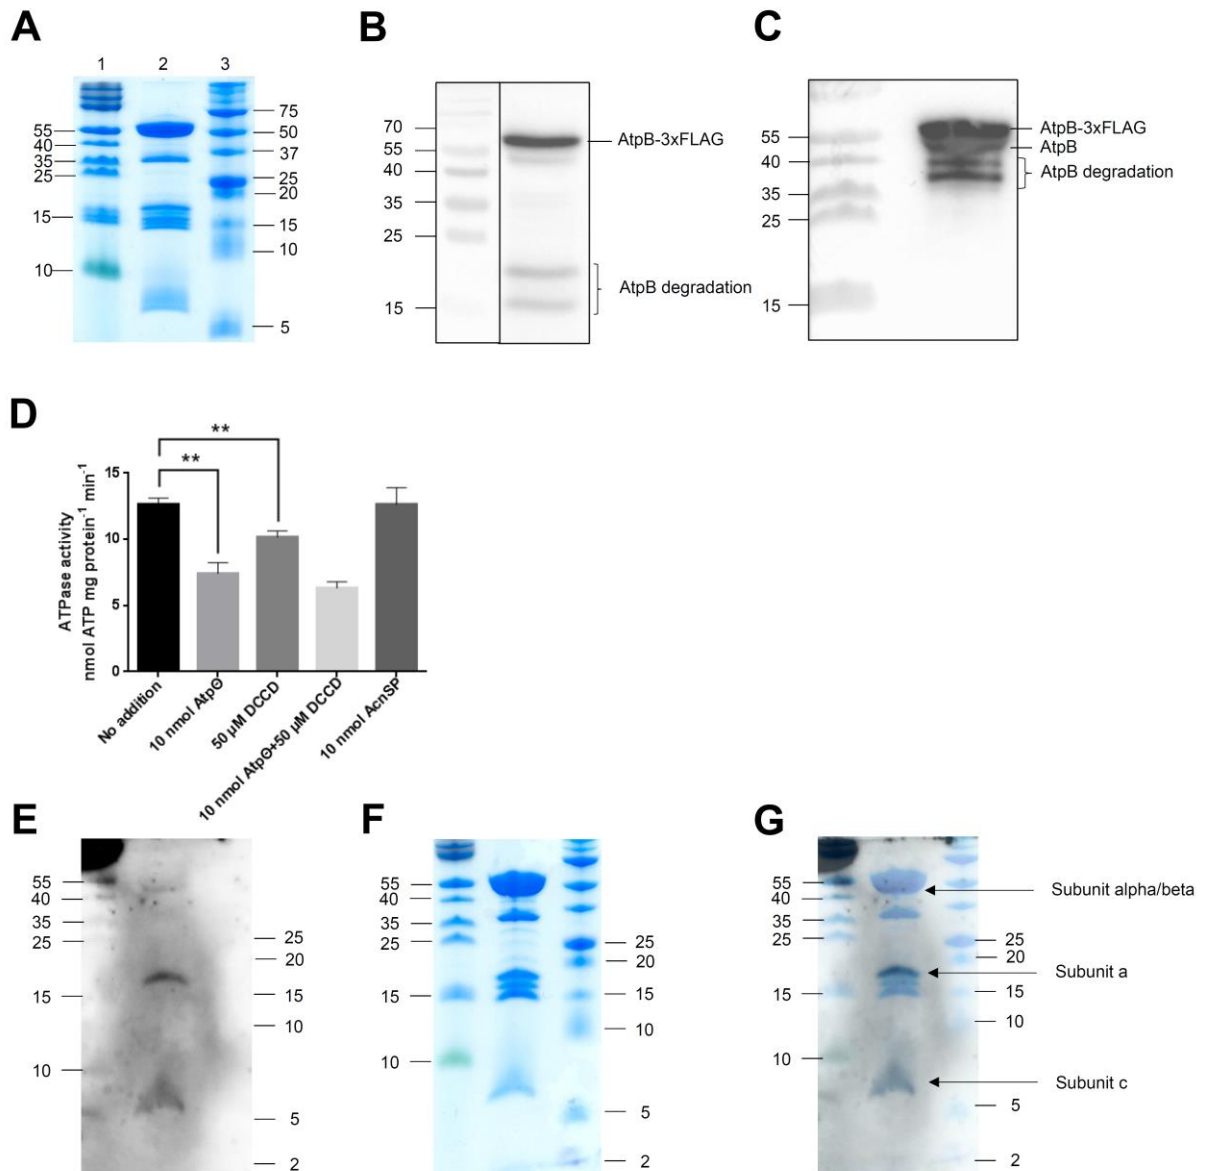

**Figure 6. Purification of the F<sub>0</sub>F<sub>1</sub> ATP synthase and its interaction with AtpΘ. (A)** Tricine SDS-PAGE displaying the purity of 10 μg *Synechocystis* 6803 F<sub>0</sub>F<sub>1</sub> ATP synthase (lane 2) isolated with AtpB-3xFLAG and gel filtration chromatography. PageRuler™ Prestained Protein Ladder (lane 1; 10 to 180 kDa) and Precision Plus Protein™ Dual Xtra Prestained Protein Standard (lane 3; 2 to 250 kDa) were used as molecular mass markers. **(B)** Western blot analysis of 10 μg purified *Synechocystis* 6803 F<sub>0</sub>F<sub>1</sub> ATP synthase probed with specific ANTI-FLAG® M2-Peroxidase (HRP) antibody. **(C)** Western blot analysis of 10 μg purified *Synechocystis* 6803 F<sub>0</sub>F<sub>1</sub> ATP synthase probed with anti-AtpB serum. The doublet for AtpB consists of the native and 3xFLAG-tagged forms of the protein. Bands in panels b and c likely resulting from degradation are labeled. **(D)** Measurement of the ATP hydrolysis activity of purified F<sub>0</sub>F<sub>1</sub> ATP synthase supplemented with different synthetic peptides or chemicals. DCCD was used as a positive control for ATPase activity inhibition, while the synthetic AcnSP peptide was used as a negative control. The differences between groups were

tested using a paired *t*-test (**Table S10**) using GraphPad software. Significance was established at \*\*,  $P < 0.05$ . **(E)** Far Western blot signal detecting the interaction partners of synthetic Atp $\theta$  peptide from purified *Synechocystis* 6803 F<sub>0</sub>F<sub>1</sub> ATP synthase. **(F)** Coomassie blue staining of the Tricine-SDS gel after blotting. **(G)** The immunoblot signal **(E)** was merged with the stained gel **(F)** to determine the interacting subunits. The subunits suspected to interact with Atp $\theta$  are labeled. PageRuler™ Prestained Protein Ladder (10–170 kDa, Fermentas; left) and Protein™ DualXtra (2–250 kDa, Bio-Rad; right) were used as molecular mass markers. In total, 15  $\mu$ g purified ATP synthase was loaded on the gel.

522



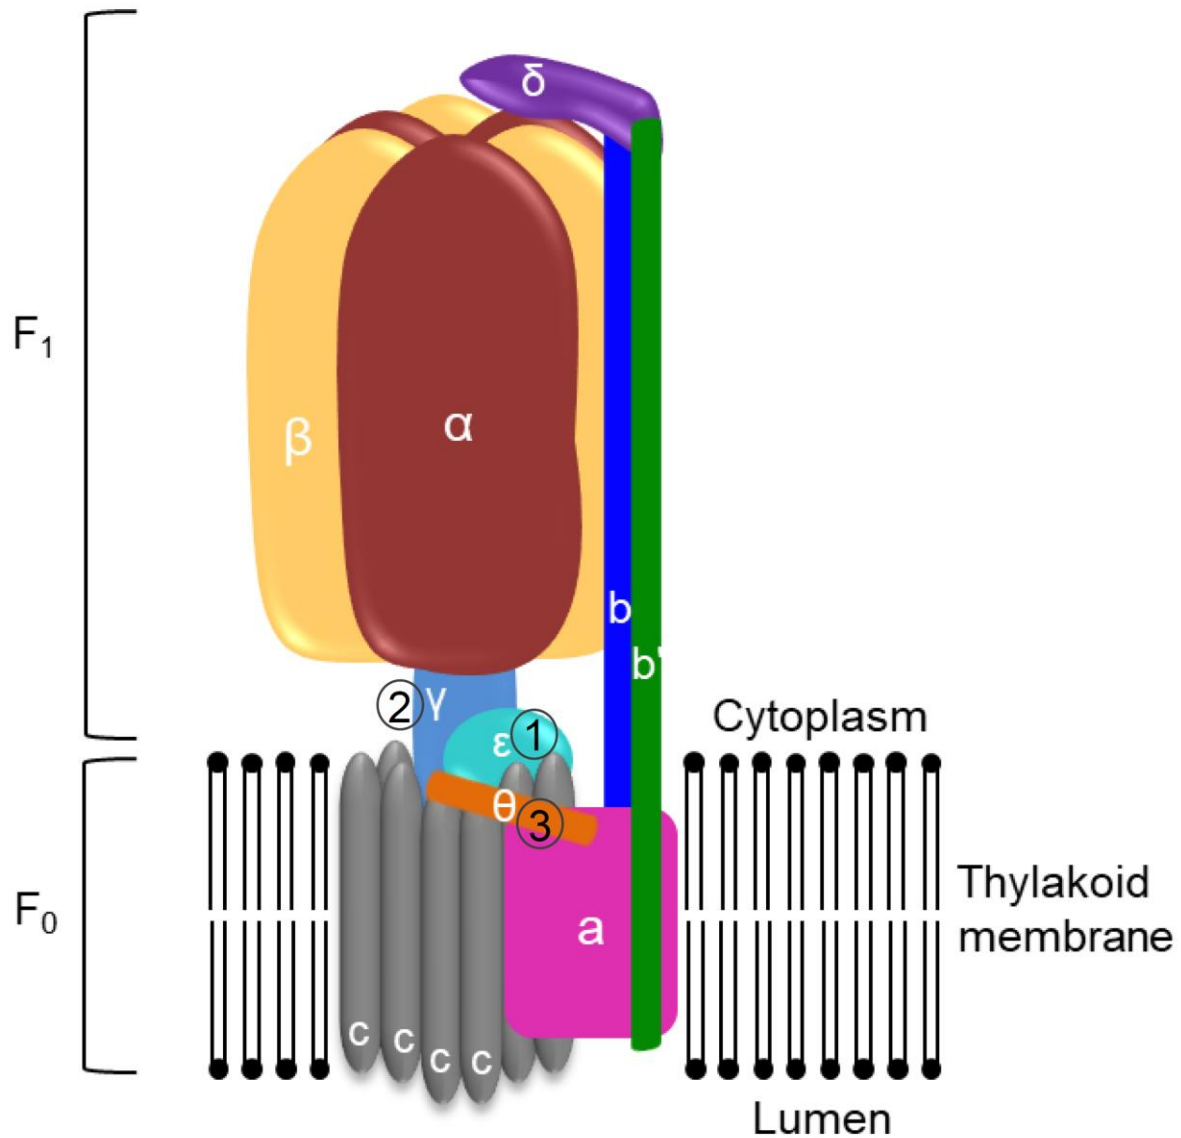

**Figure 7. Regulatory and inhibitory mechanisms impacting hydrolysis of ATP by ATP synthases in cyanobacteria.** (1)  $\epsilon$ -inhibition<sup>21</sup>, a mechanism in which the  $\epsilon$  subunit inhibits the rotation of the  $\gamma$  subunit via a conformational change<sup>41</sup>; (2) ADP inhibition, the most conserved mechanism to block ATPase activity (reviewed by Lapashina and Feniouk<sup>49</sup>) via a segment inserted in the  $\gamma$  subunit<sup>20</sup>, or (3) by Atp $\Theta$ . In this suggested mechanism, H<sup>+</sup> ions pass through the c ring and drive its rotation, and then the upper part of the complex rotates together in the non-inhibited state. Atp $\Theta$  may block the rotation of the c ring via interaction with subunit a. The computationally predicted structure of Atp $\Theta$  has tentatively been drawn next to subunits a and c, but the exact topography and mode of interaction with these membrane-embedded subunits is a topic of future research.

524 **STAR Methods**

525 **RESOURCE AVAILABILITY**

526 ***Lead contact***

527 Further information and requests for resources and reagents should be directed to and  
528 will be fulfilled by the lead contact, Wolfgang R. Hess (wolfgang.hess@biologie.uni-  
529 freiburg.de).

530 ***Materials availability***

531 N/A

532 ***Data and code availability***

- 533 • Mass spectrometry raw data have been deposited at the ProteomeXchange  
534 Consortium (<http://proteomecentral.proteomexchange.org>) and are publicly  
535 available as of the date of publication. Accession numbers are listed in the key  
536 resources table.
- 537 • This paper does not report original code.
- 538 • Any additional information required to reanalyze the data reported in this paper  
539 is available from the lead contact upon request.

540

541 **EXPERIMENTAL MODEL AND SUBJECT DETAILS**

542 ***Cultivation of cyanobacteria***

543 Wild-type *Synechocystis* sp. PCC 6803 PCC-M and mutant strains were cultured  
544 photoautotrophically in TES-buffered (20 mM, pH 8.0) BG11 medium<sup>50</sup> with gentle  
545 agitation or on agar-solidified (1.5% Kobe I agar) plates under constant illumination  
546 with white light of approximately 40  $\mu\text{mol photons m}^{-2} \text{ s}^{-1}$  at 30°C and supplemented

547 with appropriate antibiotics (5 µg/mL gentamicin, 10 µg/mL kanamycin, and 3 µg/mL  
548 chloramphenicol). For incubation in darkness, flasks were wrapped with aluminum foil.  
549 CuSO<sub>4</sub> (2 µM) was used to induce the expression of the Cu<sup>2+</sup>-responsive *petE*  
550 promoter<sup>51</sup>, while the *petJ* promoter was induced by removing Cu<sup>2+</sup> from the medium  
551 through centrifugation and resuspension. For high-density cultivation used for ATP  
552 synthase purification, *Synechocystis* 6803 overexpressing P<sub>*petE*</sub>-*atpB*-3xFLAG was  
553 cultured in the cell-DEG system as reported previously<sup>52</sup> using freshwater medium<sup>53</sup>  
554 with the following modifications: Na<sub>2</sub>EDTA and CuSO<sub>4</sub> were not included in the  
555 medium, and 10 µg/mL kanamycin or 5 µg/mL gentamicin was added.

556 Cultures of *Nostoc* 7120 were bubbled with an air/CO<sub>2</sub> mixture (1% v/v) and  
557 grown photoautotrophically at 30°C in BG11 medium<sup>50</sup>. Darkness was implemented on  
558 air-CO<sub>2</sub>-bubbled cultures by covering with aluminum foil plus black velvet. The  
559 thermophilic cyanobacterium *Thermosynechococcus elongatus* BP-1 was cultured in  
560 BG11 medium under continuous illumination with 30 µmol photons m<sup>-2</sup> s<sup>-1</sup> white light  
561 (Master LED tube Universal 1200 mm UO 16 W830 T8; Philips) at 45°C. *Gloeobacter*  
562 *violaceus* PCC 7421 was cultivated photoautotrophically in Allen's medium<sup>54</sup> in  
563 Erlenmeyer flasks under continuous white light (4 µmol photons m<sup>-2</sup> s<sup>-1</sup>) at 20°C with  
564 shaking. *Prochlorococcus* MED4 cells were grown at 22°C in AMP1 medium<sup>55</sup> under  
565 30 µmol photons m<sup>-2</sup> s<sup>-1</sup> continuous white cool light and harvested in an exponential  
566 growth phase.

## 567 **METHOD DETAILS**

### 568 ***Construction of mutant cyanobacterial strains***

569 To delete the *atpT* gene from *Synechocystis* 6803 (genome position 3274499 to  
570 3274645, reverse strand), the flanking regions of *atpT* were amplified by primer pairs  
571 AtpTKO-up-F/AtpTCmKO-up-R and AtpTCmKO-down-F/AtpTKO-down-R, and the

572 resulting fragments were fused with a chloramphenicol resistance cassette and a  
573 pUC19 backbone amplified with primer pairs AtpTKO-vec-F/AtpTKO-vec-R and CmR-  
574 F/CmR-R using AQUA cloning<sup>56</sup>. The resulting plasmid, pUC-atpTKO-CmR, was then  
575 transferred into wild-type *Synechocystis* 6803 by natural transformation. The  
576 transformants were selected on BG11 agar plates supplemented with  
577 chloramphenicol. Complete segregation was achieved after several rounds of  
578 selection.

579 The construction of overexpression strains  $P_{atpT}::atpT$ ,  $P_{atpT}::atpT$ -3xFLAG, and  
580  $P_{petJ}::3xFLAG$ -sfgfp was described previously<sup>24</sup>.  $P_{petE}::atpB$ -3xFLAG, a strain  
581 overexpressing the FLAG-tagged subunit AtpB, was constructed using primer pairs  
582 pUC19-XbaI\_PpetE\_fw/atpB::PpetE\_rev, PpetE::atpB\_fw/3xFlag\_atpB\_rev and  
583 atpB\_3xFlag\_fw/3xFlag\_PstI-pUC19\_rev. The primers used for mutant construction  
584 are listed in **Table S3**.

585 Construction of *Nostoc* 7120 strains. The strain carrying plasmid pCSEL24 (*gfp*-  
586 less control) was constructed previously<sup>57</sup>. To construct pSAM342 (transcriptional  
587 fusion of coordinates 2982431 to 2982070 from *Nostoc* 7120, reverse strand), a PCR  
588 fragment was amplified with oligonucleotides 900+901, *Clal*-*XhoI*-digested and cloned  
589 into *Clal*-*XhoI*-digested pSAM270<sup>58</sup>. To generate pSAM344 (translational Atp $\theta$ -GFP  
590 fusion, coordinates 2982431 to 2981902, reverse strand), a PCR fragment was  
591 amplified with oligonucleotides 900+902, *Clal*-*EcoRV*-digested and cloned into *Clal*-  
592 *EcoRV*-digested pSAM147<sup>59</sup> in frame with the *gfpmut2* gene, rendering pSAM343. The  
593 *EcoRI* fragment from pSAM343, containing the fusion between the *atpT* promoter, the  
594 *atpT* gene and the *gfpmut2* gene, was cloned into *EcoRI*-digested pCSEL24, rendering  
595 pSAM344. All plasmids were transferred by conjugation followed by selection of

596 streptomycin/spectinomycin (5 µg/mL each)-resistant colonies after integration in the  
597 alpha megaplasmid.

### 598 **Computational sequence analyses**

599 Homologs of the *atpT* gene were searched using the *Synechocystis* 6803 Atp $\Theta$  as  
600 query against the IMG<sup>60</sup> and UniProt databases using blastP and against the NCBI  
601 database using both TblastN<sup>61</sup> and blastP<sup>62</sup> at a threshold E value  $\leq 1e^{-5}$ . Multiple  
602 sequence alignments were conducted using Jalview2<sup>63</sup>. Isoelectric points were  
603 predicted by the R package pIR<sup>64</sup>.

604 Phylogenetic analyses were conducted in MEGA X<sup>44</sup> using the maximum  
605 likelihood algorithm based on 16S rRNA sequences extracted from the SILVA  
606 database<sup>43</sup> and modified according to Klähn *et al.*<sup>65</sup>. The evolutionary distances were  
607 computed using the maximum composite likelihood method<sup>66</sup>.

### 608 **Fluorescence microscopy**

609 Images of *Nostoc* 7120 filaments growing on top of nitrogen-free solid media were  
610 taken five days after plating. The accumulation of GFP was analyzed and quantified  
611 using a Leica TCS SP2 confocal laser scanning microscope as previously described<sup>67</sup>.

### 612 **Protein extraction and Western blots**

613 *Synechocystis* 6803 cells for protein extraction were harvested by centrifugation (4,000  
614 x g, 10 min, 4°C) and resuspended in PBS buffer (137 mM NaCl, 2.7 mM KCl, 10 mM  
615 Na<sub>2</sub>HPO<sub>4</sub>, 1.8 mM KH<sub>2</sub>PO<sub>4</sub>, pH 7.4) containing protease inhibitor cocktail. Cells were  
616 then disrupted mechanically in a Precellys homogenizer (Bertin Technologies). Glass  
617 beads and unbroken cells were removed by centrifugation at 1,000 g for 1 min at 4°C,  
618 and the total crude protein was obtained. Before loading, protein samples were boiled

619 with 1x protein loading buffer at 95°C for 10 min or incubated at 50°C for 30 min  
620 supplemented with 2% SDS if the membrane fraction was included.

621 For Western blot analysis, proteins were separated either in 15% glycine-SDS  
622 gels or in 16%/6 M urea Tricine-SDS gels. PageRuler Prestained Protein Ladder (10–  
623 170 kDa, Fermentas) or Precision Plus Protein DualXtra (2–250 kDa, Bio-Rad) was  
624 used as a molecular mass marker. The separated proteins were then transferred to  
625 nitrocellulose membranes (Hybond™-ECL, GE Healthcare) by semidry electroblotting.  
626 The blotted membrane was then blocked with 3% skimmed milk dissolved in TBST (20  
627 mM Tris pH 7.6, 150 mM NaCl, 0.1% Tween-20) and incubated with primary antibody  
628 (1:500 dilution for anti-Atp $\theta$  antiserum and 1:2,000 for anti-AtpB antibody) and  
629 secondary antibody (1:10,000 anti-rabbit antibody) sequentially. The anti-Atp $\theta$   
630 antiserum was generated by a commercial provider (Pineda Antikörper-Service).  
631 Signals were detected with ECL start Western blotting detection reagent (GE  
632 Healthcare) on a chemiluminescence imager system (Fusion SL, Vilber Lourmat).

### 633 ***Isolation of FLAG-tagged proteins and mass spectrometry analysis***

634 For the pull-down assay, 800 mL of *Synechocystis* 6803 culture at an OD<sub>750</sub> of  
635 approximately 1 was harvested by centrifugation at 4,000 g for 30 min at 4°C. Cell  
636 pellets were washed once with prechilled FLAG buffer (50 mM Hepes-NaOH pH 7.0,  
637 5 mM MgCl<sub>2</sub>, 25 mM CaCl<sub>2</sub>, 150 mM NaCl, 10% glycerol, 0.1% Tween-20) and then  
638 resuspended in the same buffer supplemented with protease inhibitor cocktail. The cell  
639 suspension was disrupted with a Precellys homogenizer (Bertin Technologies,  
640 France). All subsequent steps were carried out at 4°C. Total cell extracts and glass  
641 beads were transferred to Bio-Spin® Disposable Chromatography Columns (Bio-Rad),  
642 which were put on centrifugation tubes (Sorvall Instruments). The glass beads were  
643 separated from cellular components by centrifugation (4,000 g, 5 min, 4°C). Membrane

644 proteins were then solubilized by adding 2% *n*-dodecyl-beta-D-maltoside ( $\beta$ -DM),  
645 followed by dark incubation for 1 h at 4°C with gentle agitation. Nonsoluble components  
646 were removed by centrifugation (25,000 g, 30 min, 4°C), and the solubilized crude  
647 extract (sCE) was transferred to a new tube.

648 FLAG-tagged proteins were purified by column chromatography using ANTI-  
649 FLAG M2 affinity agarose gel or ANTI-FLAG M2 magnetic beads (both from Sigma-  
650 Aldrich) according to the manufacturer's instructions. When ANTI-FLAG M2 affinity  
651 agarose gel was used, the sCE was loaded and passed over the column three times  
652 to improve binding. The column was washed with 5 x 2 mL of FLAG buffer, and the  
653 FLAG-tagged proteins were eluted by incubating the matrix with 1x protein loading  
654 buffer at 50°C for 30 min. The agarose was sedimented by centrifugation (16,000 g, 5  
655 min, RT), and 20  $\mu$ L of the resulting eluates were loaded on a glycine SDS-PAGE,  
656 which was subsequently stained with Coomassie. Then, each gel lane was cut into  
657 pieces, destained, desiccated and rehydrated in trypsin as previously described<sup>68</sup>. In  
658 gel-digest was incubated at 37 °C overnight and peptides were eluted with water by  
659 sonication for 15 min.

660 Samples were loaded on an EASY-nLC II system (Thermo Fisher Scientific)  
661 equipped with an in-house built 20 cm column (inner diameter 100  $\mu$ m, outer diameter  
662 360  $\mu$ m) filled with ReproSil-Pur 120 C18-AQ reversed-phase material (3  $\mu$ m particles,  
663 Dr. Maisch GmbH). Elution of peptides was achieved with a nonlinear 77 min gradient  
664 from 1 to 99% solvent B (0.1% (v/v) acetic acid in acetonitrile) with a flow rate of 300  
665 nl/min and injected online into an LTQ Orbitrap XL (Thermo Fisher Scientific). The  
666 survey scan at a resolution of R=30,000 and 1 x 10<sup>6</sup> automatic gain control target in  
667 the Orbitrap with activated lock mass correction was followed by selection of the five  
668 most abundant precursor ions for fragmentation. Single charged ions as well as ions

669 without detected charge states were excluded from MS/MS analysis. Fragmented ions  
670 were dynamically excluded from fragmentation for 30 s. Database searches with  
671 Sorcerer-SEQUEST 4 (Sage-N Research, Milpitas, USA) were performed against a  
672 *Synechocystis* 6803 database downloaded from Uniprot (Proteome-ID UP000001425)  
673 on 11/12/20, which was supplemented with common laboratory contaminants and the  
674 sequences of Atp $\theta$ -3xFLAG and GFP-3xFLAG. After adding reverse entries the final  
675 database contained 7,102 entries. Database searches were based on a strict trypsin  
676 digestion with two missed cleavages permitted. No fixed modifications were  
677 considered and oxidation of methionine was considered as variable modification. The  
678 mass tolerance for precursor ions was set to 10 ppm and the mass tolerance for  
679 fragment ions to 0.5 Da. Validation of MS/MS-based peptide and protein identification  
680 was performed with Scaffold V4.8.7 (Proteome Software, Portland, USA), and peptide  
681 identifications were accepted if they exhibited at least deltaCn scores of greater than  
682 0.1 and XCorr scores of greater than 2.2, 3.3 and 3.75 for doubly, triply and all higher  
683 charged peptides, respectively. Protein identifications were accepted if at least 2  
684 unique peptides were identified.

685 Volcano plot visualization of the mass spectrometry results was performed using  
686 Perseus (version 1.6.1.3)<sup>69</sup> according to the following procedures. Contaminants and  
687 proteins with less than three valid values in at least one experimental group (Atp $\theta$ -  
688 3xFLAG and GFP-3xFLAG) were first removed from the matrix, and the normalized  
689 spectrum abundance factor (NSAF) intensities were log<sub>2</sub>-transformed. Imputation of  
690 the missing values was then performed based on the normal distribution of each  
691 column using default settings. Two sample *t* tests were performed before generating  
692 the final volcano plot. A heat map was generated by the hierarchical clustering function  
693 of Perseus 1.6.1.3 with default settings.



694 FLAG-tagged F<sub>0</sub>F<sub>1</sub> ATP synthase was purified from *Synechocystis* 6803  
695 overexpressing P<sub>petE</sub>::*atpB*-3xFLAG using a similar approach with modifications.  
696 *Synechocystis* 6803 overexpressing P<sub>petE</sub>::*atpB*-3xFLAG was cultured in Cu<sup>2+</sup>-free  
697 medium using the cell-DEG system in which much higher optical densities were  
698 obtained<sup>52</sup>. Cu<sup>2+</sup> at 2 μM was added to the system when the OD<sub>750</sub> reached 8.0 to  
699 induce the expression of the *petE* promoter, and the cells were collected by  
700 centrifugation (5,000 g, 10 min, room temperature). Cell pellets were washed once  
701 using prechilled FLAG buffer 2 (FLAG buffer without Tween-20). After disruption using  
702 Precellys (all remaining steps were performed at 4°C unless stated otherwise), the  
703 lysate was centrifuged at 4,000 g for 10 min to remove unbroken cells and beads,  
704 followed by 20,000 g for 1 h to collect the membrane fraction. The membrane fraction  
705 was then resuspended in FLAG buffer 2 supplemented with 1% *n*-dodecyl-beta-D-  
706 maltoside (β-DM) and incubated for 1 h with gentle agitation. Nonsoluble components  
707 were removed by centrifugation (20,000 g, 30 min), and the supernatant was filtered  
708 with a 0.45 μm syringe filter and then subjected to ANTI-FLAG M2 affinity agarose gel  
709 electrophoresis. The resin was prepared according to the manufacturer's instructions  
710 using FLAG buffer 3 (FLAG buffer 2 supplemented with cocktail protease inhibitor and  
711 0.03% [w/v] β-DM). The column was washed with 5 x 2 mL FLAG buffer 3 and eluted  
712 with 1.5 mL FLAG buffer 3 with 150 μg/mL 3xFLAG peptide (Sigma-Aldrich). The  
713 eluates were then concentrated to 200 μl with a 100 kDa MWCO centrifuge  
714 concentrator. The protein concentration was measured using the Bradford method.

### 715 ***RNA isolation and Northern blot***

716 Cyanobacterial cells except those of *Nostoc* 7120 were harvested by vacuum filtration  
717 on hydrophilic polyethersulfone filters (Pall Supor®-800; 0.8 μm for *Synechocystis*  
718 6803, *Thermosynechococcus elongatus* BP-1 and *Gloeobacter violaceus* PCC 7421,

719 0.45  $\mu\text{m}$  for *Prochlorococcus* MED4). Total RNA was then isolated using PGTX<sup>70</sup>. The  
720 isolated RNA was mixed with 2x loading buffer (Ambion) and incubated for 5 min at  
721 65°C. Denatured RNA samples were separated in a 1.5% agarose gel supplemented  
722 with 16% (v/v) formaldehyde and then transferred to a positively charged nylon  
723 membrane (Hybond<sup>TM</sup>-N+, GE Healthcare) by capillary blotting with 20x SSC buffer (3  
724 M NaCl, 0.3 M sodium acetate, pH 7.0) overnight.

725 After the RNA was cross-linked to the membrane by UV light (125 mJ), the  
726 membranes were hybridized with specific [ $\gamma$ -<sup>32</sup>P]ATP end-labeled oligonucleotides or  
727 [ $\alpha$ -<sup>32</sup>P]UTP-labeled single-stranded RNA probes generated by *in-vitro* transcription  
728 from DNA templates using the MAXIscript® T7 In Vitro Transcription Kit (Ambion). The  
729 primers and oligonucleotides used for generating DNA templates are given in **Table**  
730 **S3**. Hybridization in 0.12 M sodium phosphate buffer (pH 7.0), 7% SDS, 50% deionized  
731 formamide and 0.25 M NaCl was performed overnight at 45°C or at 62°C with labeled  
732 oligonucleotide probes or labeled transcript probes, respectively. The hybridized  
733 membrane was then washed using washing solutions I (2xSSC, 1% SDS), II (1x SSC,  
734 0.5% SDS) and III (0.1x SSC, 0.1% SDS) for 10 min each at 5 degrees below the  
735 hybridization temperature. Total RNA from *Nostoc* 7120 was prepared as described<sup>71</sup>  
736 and separated on 8% urea-acrylamide gels. As a probe, a PCR fragment was  
737 generated as template to label one strand with Taq polymerase using only one  
738 oligonucleotide and [ $\alpha$ -<sup>32</sup>P]-dCTP. Signals were visualized using Typhoon FLA 9500  
739 (GE Healthcare) or Cyclone Storage Phosphor System (PerkinElmer) and Quantity  
740 One® software (Bio-Rad).

#### 741 **Membrane preparation and ATP hydrolysis assay**

742 One liter of *Synechocystis* 6803 or *Thermosynechococcus elongatus* BP-1 cultures  
743 were grown to an OD<sub>750</sub> of approximately 1 and cells were collected by centrifugation

744 at 6,000 g for 5 min. The pellet was then washed once with precooled buffer A (1.0 M  
745 betaine, 0.4 M d-sorbitol, 20 mM HEPES-NaOH, 15 mM CaCl<sub>2</sub>, 15 mM MgCl<sub>2</sub>, 1 mM  
746 6-amino-*n*-caproic acid, and protease inhibitor cocktail; pH 7.0) and then lysed using a  
747 Precellys homogenizer (steps afterwards were conducted at 4°C). Glass beads and  
748 unbroken cells were removed by centrifugation at 4,000 g for 10 min, and then the  
749 crude membranes were collected by centrifugation at 20,000 g for 1 h. The acquired  
750 membrane pellet was washed twice with buffer A, resuspended and incubated on ice  
751 for at least 1 h. Undissolved components were removed by centrifugation at 4,000 g  
752 for 5 min, and the membrane suspension was quantified by measuring the Chl *a*  
753 concentration at OD<sub>664</sub><sup>72</sup>.

754 The ATPase activity of the membrane was measured via an ATP hydrolysis  
755 coupled enzyme activity assay. Buffer B (10 mM TES, 100 mM KCl, 1 mM MgCl<sub>2</sub>, and  
756 0.1 mM CaCl<sub>2</sub>; pH 7.5) was supplemented with the indicated amounts of synthetic  
757 peptide or DCCD at room temperature. Then, 1 mM Mg-PEP, 0.175 mM NADH, 65 U  
758 pyruvate kinase (PK) and 82.5 U lactate dehydrogenase (LDH) was added. Before the  
759 activity measurement, 1 mM MgATP (pH 7.5) solution was added and incubated for 1  
760 min to remove residual ADP. Then, membrane preparations containing approximately  
761 10 µg Chl *a* were added to each assay, and the OD<sub>340</sub> was measured immediately and  
762 after 10 min of incubation at room temperature using quartz cuvettes. The ATPase  
763 activity was calculated accordingly at nmol ATP mg Chl *a*<sup>-1</sup> min<sup>-1</sup>. For the measurement  
764 of ATPase activity of the isolated ATP synthase, a similar method was applied, and 20  
765 µg protein was used for each assay.

#### 766 ***Far Western blotting***

767 Far Western blotting was performed as described previously<sup>38,73</sup> with modifications.  
768 After electrophoresis, proteins were transferred onto a PVDF membrane. Synthetic

769 Atp $\Theta$  peptide, anti-Atp $\Theta$  antiserum and anti-rabbit IgG antiserum were used for  
770 incubation sequentially. Milk powder was omitted in the denaturing/renaturing steps of  
771 the blotted membrane as described by Krauspe *et al.*<sup>73</sup>. The membrane with renatured  
772 proteins was first blocked with 5% milk powder in TBS-T and then incubated with 3  
773  $\mu\text{g}/\text{mL}$  synthetic Atp $\Theta$  peptide at 4°C overnight. Signals were detected with ECL start  
774 Western blotting detection reagent (GE Healthcare) on a chemiluminescence imager  
775 system (Fusion SL, Vilber Lourmat).

## 776 **QUANTIFICATION AND STATISTICAL ANALYSIS**

777 Statistical analyses were performed with GraphPad Prism 6.0 (GraphPad Software,  
778 Inc., San Diego, CA). The ATP hydrolysis activities of membrane fractions isolated  
779 from different strains or conditions were compared using unpaired *t*-test with Welch's  
780 correction (**Figure 5A** and **Figure S3; Data S1A** and **S1F**), and those of membranes  
781 isolated from the same strain but with different additives were compared using ratio  
782 paired *t*-test (**Figures 5A, 5B, 5C, 5D** and **Figure 6D; Data S1A, S1B, S1C, S1D** and  
783 **S1E**). Differences between groups were considered to be significant at a *P* value of  
784  $<0.05$  and very significant at a *P* value of  $<0.01$ .

785

## 786 **KEY RESOURCES TABLE**

| <b>REAGENT or RESOURCE</b>                                                                                  | <b>SOURCE</b>    | <b>IDENTIFIER</b> |
|-------------------------------------------------------------------------------------------------------------|------------------|-------------------|
| <b>Antibodies</b>                                                                                           |                  |                   |
| Mouse anti-FLAG M2 antibody                                                                                 | Sigma-Aldrich    | Cat#A8592-1MG     |
| Polyclonal AtpB antiserum   Beta subunit of ATP synthase (chloroplastic + mitochondrial; rabbit antibodies) | Agrisera, Sweden | Cat# AS05 085-10  |

|                                                                       |                                                |                                          |
|-----------------------------------------------------------------------|------------------------------------------------|------------------------------------------|
| Anti-Atp $\theta$ antiserum (rabbit antibodies)                       | Pineda Antibody-Service                        | this paper                               |
| Goat anti-rabbit secondary antibody                                   | Sigma-Aldrich                                  | Cat#A8275                                |
| <b>Bacterial and virus strains</b>                                    |                                                |                                          |
| <i>Synechocystis</i> sp. PCC 6803                                     | Cyanolab                                       | Strain PCC-M                             |
| <i>Synechocystis</i> sp. PCC 6803 ( $P_{atpT}$ - <i>atpT</i> )        | This study                                     | N/A                                      |
| <i>Synechocystis</i> sp. PCC 6803 ( $P_{atpT}$ - <i>atpT</i> -3xFLAG) | This study                                     | N/A                                      |
| <i>Synechocystis</i> sp. PCC 6803 (Atp $\theta$ -KO)                  | This study                                     | N/A                                      |
| <i>Synechocystis</i> sp. PCC 6803 ( $P_{petE}$ - <i>sfGFP</i> )       | This study                                     | N/A                                      |
| <i>Thermosynechococcus elongatus</i> BP1                              | Gen Enomoto                                    | N/A                                      |
| <i>Prochlorococcus</i> sp. MED4                                       | Claudia Steglich                               | N/A                                      |
| <i>Gloeobacter violaceus</i> PCC 7421                                 | Mai Watanabe                                   | N/A                                      |
| <i>Nostoc</i> sp. PCC 7120                                            | Instituto de Bioquímica Vegetal y Fotosíntesis | N/A                                      |
| <i>Nostoc</i> 7120 (GFP-less control)                                 | This study                                     | N/A                                      |
| <i>Nostoc</i> 7120 ( $P_{atpT}$ - <i>gfp</i> )                        | This study                                     | N/A                                      |
| <i>Nostoc</i> 7120 ( $P_{atpT}$ -Atp $\theta$ -GFP)                   | This study                                     | N/A                                      |
| <b>Chemicals, peptides, and recombinant proteins</b>                  |                                                |                                          |
| Atp $\theta$ peptide                                                  | JPT Peptide Technologies GmbH                  | this paper                               |
| AcnSP peptide                                                         | JPT Peptide Technologies GmbH                  | de Alvarenga et al. (2020) <sup>33</sup> |

|                                                                                                                                |                               |               |
|--------------------------------------------------------------------------------------------------------------------------------|-------------------------------|---------------|
| Atpθ_N peptide                                                                                                                 | JPT Peptide Technologies GmbH | this paper    |
| Atpθ_C peptide                                                                                                                 | JPT Peptide Technologies GmbH | this paper    |
| Atpθ_EE peptide                                                                                                                | JPT Peptide Technologies GmbH | this paper    |
| Atpθ_H peptide                                                                                                                 | JPT Peptide Technologies GmbH | this paper    |
| <b>Deposited data</b>                                                                                                          |                               |               |
| Mass spectrometry comparing co-immunoprecipitated proteins of Atpθ-3xFLAG and sfGFP-Atpθ ( <i>n</i> =1)                        | ProteomeXchange               | PXD020126     |
| Mass spectrometry comparing co-immunoprecipitated proteins of Atpθ-3xFLAG and sfGFP-Atpθ ( <i>n</i> =3; biological replicates) | ProteomeXchange               | PXD024905     |
| <b>Oligonucleotides</b>                                                                                                        |                               |               |
| See Table S3                                                                                                                   |                               |               |
| <b>Recombinant DNA</b>                                                                                                         |                               |               |
| See Table S2                                                                                                                   |                               |               |
| <b>Software and algorithms</b>                                                                                                 |                               |               |
| Quantity One                                                                                                                   | Bio-Rad                       | Version 4.6.6 |
| Confocal Software (LCS)                                                                                                        | Leica                         | Version 2.61  |
| GraphPad Prism                                                                                                                 | GraphPad Software, Inc.       | Version 6.0   |

788 **Overview on Supplementary Tables**

789 **Table S1.** Number of putative *atpT* homologs, lengths, isoelectric points and amino  
790 acid sequences of all predicted Atp $\Theta$  homologs in the listed cyanobacteria. An  
791 alternative start codon for the Atp $\Theta$  homolog in *Pseudanabaena* sp. PCC 7367 is  
792 marked in red.

793 **Table S2.** Plasmids and vectors used in this work.

794 **Table S3.** Primers and oligonucleotides used in this work. Nucleotides in boldface  
795 letters highlight the sequence of the T7 promoter.

796 **Table S4.** Mass spectrometry results of pull-down experiment. Subunits of the ATP  
797 synthase are marked in bold. “High” is written for the log<sub>2</sub> fold change if the respective  
798 protein was not detected in either one or both of the controls ( $P_{atpT}$ -*atpT* and  $P_{petJ}$ -  
799 3xFLAG-*sfgfp*).

800 **Table S5.** Raw mass spectrometry results of the second pull-down experiment. The  
801 table lists all proteins identified together with their quantitative values. Proteins, which  
802 have not been identified in a given samples, are marked with n.d. (not detected). The  
803 normalized spectrum abundance factor (NSAF) is used for quantification. The higher  
804 abundant a protein is in the sample, the higher is its quantitative value. Protein  
805 abundance is also visualized by a color gradient from green (low abundance) over  
806 yellow to red (highly abundant).

807 **Data S1.** Details for the statistical analysis. **(A)** Details for the statistical analysis in  
808 **Figure 5A.** **(B)** Details for the statistical analysis in **Figure 5B.** **(C)** Details for the  
809 statistical analysis in **Figure 5C.** **(D)** Details for the statistical analysis in **Figure 5D.**  
810 **(E)** Details for the statistical analysis in **Figure 6D.** **(F)** Details for the statistical analysis  
811 in **Figure S3.**

## 812 References

- 813 1. Kühlbrandt, W. (2019). Structure and mechanisms of F-type ATP synthases. *Annu.*  
814 *Rev. Biochem.* *88*, 515–549.
- 815 2. Gray, M.W. (2012). Mitochondrial evolution. *Cold Spring Harb. Perspect. Biol.* *4*,  
816 a011403.
- 817 3. Maréchal, E. (2018). Primary endosymbiosis: emergence of the primary chloroplast  
818 and the chromatophore, two independent events. *Methods Mol. Biol. Clifton NJ*  
819 *1829*, 3–16.
- 820 4. Martijn, J., Vosseberg, J., Guy, L., Offre, P., and Ettema, T.J.G. (2018). Deep  
821 mitochondrial origin outside the sampled alphaproteobacteria. *Nature* *557*, 101–  
822 105.
- 823 5. Mereschkowsky, C. (1905). Über natur und ursprung der chromatophoren im  
824 pflanzenreiche. *Biol Cent.* *25*, 593–604.
- 825 6. Ponce-Toledo, R.I., Deschamps, P., López-García, P., Zivanovic, Y., Benzerara,  
826 K., and Moreira, D. (2017). An early-branching freshwater cyanobacterium at the  
827 origin of plastids. *Curr. Biol.* *27*, 386–391.
- 828 7. Sagan, L. (1967). On the origin of mitosing cells. *J. Theor. Biol.* *14*, 255–274.
- 829 8. Hong, S., and Pedersen, P.L. (2008). ATP synthase and the actions of inhibitors  
830 utilized to study its roles in human health, disease, and other scientific areas.  
831 *Microbiol. Mol. Biol. Rev.* *72*, 590–641.
- 832 9. Pullman, M.E., and Monroy, G.C. (1963). A naturally occurring inhibitor of  
833 mitochondrial adenosine triphosphatase. *J. Biol. Chem.* *238*, 3762–3769.
- 834 10. Hashimoto, T., Yoshida, Y., and Tagawa, K. (1990). Regulatory proteins of F<sub>1</sub>F<sub>0</sub>-  
835 ATPase: role of ATPase inhibitor. *J. Bioenerg. Biomembr.* *22*, 27–38.
- 836 11. Hong, S., and Pedersen, P.L. (2002). ATP synthase of yeast: structural insight into  
837 the different inhibitory potencies of two regulatory peptides and identification of a  
838 new potential regulator. *Arch. Biochem. Biophys.* *405*, 38–43.
- 839 12. Solaini, G., Sgarbi, G., and Baracca, A. (2021). The F<sub>1</sub>F<sub>0</sub>-ATPase inhibitor, IF1, is  
840 a critical regulator of energy metabolism in cancer cells. *Biochem. Soc. Trans.*,  
841 BST20200742.
- 842 13. Mendoza-Hoffmann, F., Pérez-Oseguera, Á., Cevallos, M.Á., Zarco-Zavala, M.,  
843 Ortega, R., Peña-Segura, C., Espinoza-Simón, E., Uribe-Carvajal, S., and García-  
844 Trejo, J.J. (2018). The biological role of the ζ subunit as unidirectional inhibitor of  
845 the F<sub>1</sub>F<sub>0</sub>-ATPase of *Paracoccus denitrificans*. *Cell Rep.* *22*, 1067–1078.
- 846 14. Hahn, A., Vonck, J., Mills, D.J., Meier, T., and Kühlbrandt, W. (2018). Structure,  
847 mechanism, and regulation of the chloroplast ATP synthase. *Science* *360*,  
848 eaat4318.
- 849 15. Cozens, A.L., and Walker, J.E. (1987). The organization and sequence of the  
850 genes for ATP synthase subunits in the cyanobacterium *Synechococcus* 6301.  
851 Support for an endosymbiotic origin of chloroplasts. *J. Mol. Biol.* *194*, 359–383.
- 852 16. Nalin, C.M., and McCarty, R.E. (1984). Role of a disulfide bond in the gamma  
853 subunit in activation of the ATPase of chloroplast coupling factor 1. *J. Biol. Chem.*  
854 *259*, 7275–7280.
- 855 17. Miki, J., Maeda, M., Mukohata, Y., and Futai, M. (1988). The gamma-subunit of  
856 ATP synthase from spinach chloroplasts. Primary structure deduced from the  
857 cloned cDNA sequence. *FEBS Lett.* *232*, 221–226.
- 858 18. Mullineaux, C.W. (2014). Co-existence of photosynthetic and respiratory activities  
859 in cyanobacterial thylakoid membranes. *Biochim. Biophys. Acta BBA - Bioenerg.*  
860 *1837*, 503–511.



- 861 19. Mullineaux, C.W., and Liu, L.-N. (2020). Membrane Dynamics in Phototrophic  
862 Bacteria. *Annu. Rev. Microbiol.* *74*, 633–654.
- 863 20. Sunamura, E.-I., Konno, H., Imashimizu-Kobayashi, M., Sugano, Y., and Hisabori,  
864 T. (2010). Physiological impact of intrinsic ADP inhibition of cyanobacterial  $F_0F_1$   
865 conferred by the inherent sequence inserted into the  $\gamma$  subunit. *Plant Cell Physiol.*  
866 *51*, 855–865.
- 867 21. Imashimizu, M., Bernát, G., Sunamura, E.-I., Broekmans, M., Konno, H., Isato, K.,  
868 Rögner, M., and Hisabori, T. (2011). Regulation of  $F_0F_1$ -ATPase from  
869 *Synechocystis* sp. PCC 6803 by  $\gamma$  and  $\epsilon$  subunits is significant for light/dark  
870 adaptation. *J. Biol. Chem.* *286*, 26595–26602.
- 871 22. Kopf, M., Klähn, S., Scholz, I., Matthiessen, J.K.F., Hess, W.R., and Voß, B. (2014).  
872 Comparative analysis of the primary transcriptome of *Synechocystis* sp. PCC 6803.  
873 *DNA Res.* *21*, 527–539.
- 874 23. Mitschke, J., Georg, J., Scholz, I., Sharma, C.M., Dienst, D., Bantscheff, J., Voß,  
875 B., Steglich, C., Wilde, A., Vogel, J., et al. (2011). An experimentally anchored map  
876 of transcriptional start sites in the model cyanobacterium *Synechocystis* sp.  
877 PCC6803. *Proc. Natl. Acad. Sci. USA* *108*, 2124–2129.
- 878 24. Baumgartner, D., Kopf, M., Klähn, S., Steglich, C., and Hess, W.R. (2016). Small  
879 proteins in cyanobacteria provide a paradigm for the functional analysis of the  
880 bacterial micro-proteome. *BMC Microbiol.* *16*, 285.
- 881 25. Mareš, J., Hrouzek, P., Kaňa, R., Ventura, S., Strunecký, O., and Komárek, J.  
882 (2013). The primitive thylakoid-less cyanobacterium *Gloeobacter* is a common  
883 rock-dwelling organism. *PLOS ONE* *8*, e66323.
- 884 26. Lou, P.-H., Hansen, B.S., Olsen, P.H., Tullin, S., Murphy, M.P., and Brand, M.D.  
885 (2007). Mitochondrial uncouplers with an extraordinary dynamic range. *Biochem.*  
886 *J.* *407*, 129–140.
- 887 27. Trebst, A. (2007). Inhibitors in the functional dissection of the photosynthetic  
888 electron transport system. *Photosynth. Res.* *92*, 217–224.
- 889 28. Rippka, R., Waterbury, J., and Cohen-Bazire, G. (1974). A cyanobacterium which  
890 lacks thylakoids. *Arch. Microbiol.* *100*, 419–436.
- 891 29. Partensky, F., Hess, W.R., and Vaulot, D. (1999). *Prochlorococcus*, a marine  
892 photosynthetic prokaryote of global significance. *Microbiol. Mol. Biol. Rev.* *63*,  
893 106–127.
- 894 30. Mitschke, J., Vioque, A., Haas, F., Hess, W.R., and Muro-Pastor, A.M. (2011).  
895 Dynamics of transcriptional start site selection during nitrogen stress-induced cell  
896 differentiation in *Anabaena* sp. PCC 7120. *Proc. Natl. Acad. Sci. USA* *108*, 20130–  
897 20135.
- 898 31. Brenes-Álvarez, M., Olmedo-Verd, E., Vioque, A., and Muro-Pastor, A.M. (2016).  
899 Identification of conserved and potentially regulatory small RNAs in heterocystous  
900 cyanobacteria. *Front. Microbiol.* *7*, 48.
- 901 32. Washietl, S., Findeiss, S., Müller, S.A., Kalkhof, S., von Bergen, M., Hofacker, I.L.,  
902 Stadler, P.F., and Goldman, N. (2011). RNAcode: robust discrimination of coding  
903 and noncoding regions in comparative sequence data. *RNA* *17*, 578–594.
- 904 33. de Alvarenga, L.V., Hess, W.R., Hagemann, M., and Hagemann, M. (2020). AcnSP  
905 - a novel small protein regulator of aconitase activity in the cyanobacterium  
906 *Synechocystis* sp. PCC 6803. *Front. Microbiol.* *11*, 1445.
- 907 34. Bulyha, I., Schmidt, C., Lenz, P., Jakovljevic, V., Höne, A., Maier, B., Hoppert, M.,  
908 and Søggaard-Andersen, L. (2009). Regulation of the type IV pili molecular machine  
909 by dynamic localization of two motor proteins. *Mol. Microbiol.* *74*, 691–706.

- 910 35. Okamoto, S., and Ohmori, M. (2002). The cyanobacterial PilT protein responsible  
911 for cell motility and transformation hydrolyzes ATP. *Plant Cell Physiol.* *43*, 1127–  
912 1136.
- 913 36. Lamiable, A., Thévenet, P., Rey, J., Vavrusa, M., Derreumaux, P., and Tufféry, P.  
914 (2016). PEP-FOLD3: faster de novo structure prediction for linear peptides in  
915 solution and in complex. *Nucleic Acids Res.* *44*, W449-454.
- 916 37. Gautier, R., Douguet, D., Antony, B., and Drin, G. (2008). HELIQUEST: a web  
917 server to screen sequences with specific alpha-helical properties. *Bioinforma. Oxf.*  
918 *Engl.* *24*, 2101–2102.
- 919 38. Wu, Y., Li, Q., and Chen, X.-Z. (2007). Detecting protein-protein interactions by Far  
920 western blotting. *Nat. Protoc.* *2*, 3278–3284.
- 921 39. Sobti, M., Smits, C., Wong, A.S., Ishmukhametov, R., Stock, D., Sandin, S., and  
922 Stewart, A.G. (2016). Cryo-EM structures of the autoinhibited *E. coli* ATP synthase  
923 in three rotational states. *eLife* *5*, e21598.
- 924 40. Feniouk, B.A., Suzuki, T., and Yoshida, M. (2006). The role of subunit epsilon in  
925 the catalysis and regulation of F<sub>0</sub>F<sub>1</sub>-ATP synthase. *Biochim. Biophys. Acta* *1757*,  
926 326–338.
- 927 41. Konno, H., Murakami-Fuse, T., Fujii, F., Koyama, F., Ueoka-Nakanishi, H., Pack,  
928 C.-G., Kinjo, M., and Hisabori, T. (2006). The regulator of the F<sub>1</sub> motor: inhibition  
929 of rotation of cyanobacterial F<sub>1</sub>-ATPase by the epsilon subunit. *EMBO J.* *25*, 4596–  
930 4604.
- 931 42. Gu, J., Zhang, L., Zong, S., Guo, R., Liu, T., Yi, J., Wang, P., Zhuo, W., and Yang,  
932 M. (2019). Cryo-EM structure of the mammalian ATP synthase tetramer bound with  
933 inhibitory protein IF1. *Science* *364*, 1068–1075.
- 934 43. Quast, C., Pruesse, E., Yilmaz, P., Gerken, J., Schweer, T., Yarza, P., Peplies, J.,  
935 and Glöckner, F.O. (2013). The SILVA ribosomal RNA gene database project:  
936 improved data processing and web-based tools. *Nucleic Acids Res.* *41*, D590-596.
- 937 44. Kumar, S., Stecher, G., Li, M., Nnyaz, C., and Tamura, K. (2018). MEGA X:  
938 molecular evolutionary genetics analysis across computing platforms. *Mol. Biol.*  
939 *Evol.* *35*, 1547–1549.
- 940 45. Rzhetsky, A., and Nei, M. (1992). A simple method for estimating and testing  
941 minimum-evolution trees. *Mol. Biol. Evol.* *9*, 945–945.
- 942 46. Felsenstein, J. (1985). Confidence limits on phylogenies: an approach using the  
943 Bootstrap. *Evolution* *39*, 783–791.
- 944 47. Schägger, H. (2006). Tricine-SDS-PAGE. *Nat. Protoc.* *1*, 16–22.
- 945 48. Tusher, V.G., Tibshirani, R., and Chu, G. (2001). Significance analysis of  
946 microarrays applied to the ionizing radiation response. *Proc. Natl. Acad. Sci. USA*  
947 *98*, 5116–5121.
- 948 49. Lapashina, A.S., and Feniouk, B.A. (2018). ADP-inhibition of H<sup>+</sup>-F<sub>0</sub>F<sub>1</sub>-ATP  
949 synthase. *Biochem. Mosc.* *83*, 1141–1160.
- 950 50. Rippka, R., Deruelles, J., Waterbury, J.B., Herdman, M., and Stanier, R.Y. (1979).  
951 Generic assignments, strain histories and properties of pure cultures of  
952 cyanobacteria. *Microbiology* *111*, 1–61.
- 953 51. Zhang, L., McSpadden, B., Pakrasi, H.B., and Whitmarsh, J. (1992). Copper-  
954 mediated regulation of cytochrome c553 and plastocyanin in the cyanobacterium  
955 *Synechocystis* 6803. *J. Biol. Chem.* *267*, 19054–19059.
- 956 52. Lippi, L., Bähr, L., Wüstenberg, A., Wilde, A., and Steuer, R. (2018). Exploring the  
957 potential of high-density cultivation of cyanobacteria for the production of  
958 cyanophycin. *Algal Res.* *31*, 363–366.

- 959 53. Migur, A., Heyl, F., Fuss, J., Srikumar, A., Huettel, B., Steglich, C., Prakash, J.S.S.,  
960 Reinhardt, R., Backofen, R., Owttrim, G.W., et al. (2021). The temperature-  
961 regulated DEAD-box RNA helicase CrhR interactome: Autoregulation and  
962 photosynthesis-related transcripts. *J. Exp. Bot.*, erab416.
- 963 54. Allen, M.M. (1968). Simple conditions for growth of unicellular blue-green algae on  
964 plates. *J. Phycol.* 4, 1–4.
- 965 55. Moore, L.R., Coe, A., Zinser, E.R., Saito, M.A., Sullivan, M.B., Lindell, D., Frois-  
966 Moniz, K., Waterbury, J., and Chisholm, S.W. (2007). Culturing the marine  
967 cyanobacterium *Prochlorococcus*. *Limnol. Oceanogr. Methods* 5, 353–362.
- 968 56. Beyer, H.M., Gonschorek, P., Samodelov, S.L., Meier, M., Weber, W., and  
969 Zurbruggen, M.D. (2015). AQUA cloning: a versatile and simple enzyme-free  
970 cloning approach. *PLOS ONE* 10, e0137652.
- 971 57. Olmedo-Verd, E., Muro-Pastor, A.M., Flores, E., and Herrero, A. (2006). Localized  
972 induction of the *ntcA* regulatory gene in developing heterocysts of *Anabaena* sp.  
973 strain PCC 7120. *J. Bacteriol.* 188, 6694–6699.
- 974 58. Brenes-Álvarez, M., Mitschke, J., Olmedo-Verd, E., Georg, J., Hess, W.R., Vioque,  
975 A., and Muro-Pastor, A.M. (2019). Elements of the heterocyst-specific  
976 transcriptome unravelled by co-expression analysis in *Nostoc* sp. PCC 7120.  
977 *Environ. Microbiol.* 21, 2544–2558.
- 978 59. Muro-Pastor, A.M., Flores, E., and Herrero, A. (2009). NtcA-regulated heterocyst  
979 differentiation genes *hetC* and *devB* from *Anabaena* sp. strain PCC 7120 exhibit a  
980 similar tandem promoter arrangement. *J. Bacteriol.* 191, 5765–5774.
- 981 60. Markowitz, V.M., Chen, I.-M.A., Palaniappan, K., Chu, K., Szeto, E., Grechkin, Y.,  
982 Ratner, A., Jacob, B., Huang, J., Williams, P., et al. (2012). IMG: the Integrated  
983 Microbial Genomes database and comparative analysis system. *Nucleic Acids*  
984 *Res.* 40, D115-122.
- 985 61. Gertz, E.M., Yu, Y.-K., Agarwala, R., Schäffer, A.A., and Altschul, S.F. (2006).  
986 Composition-based statistics and translated nucleotide searches: Improving the  
987 TBLASTN module of BLAST. *BMC Biol.* 4, 41.
- 988 62. Altschul, S.F. (2014). BLAST Algorithm. In eLS (American Cancer Society).
- 989 63. Waterhouse, A.M., Procter, J.B., Martin, D.M.A., Clamp, M., and Barton, G.J.  
990 (2009). Jalview Version 2—a multiple sequence alignment editor and analysis  
991 workbench. *Bioinformatics* 25, 1189–1191.
- 992 64. Audain, E., Ramos, Y., Hermjakob, H., Flower, D.R., and Perez-Riverol, Y. (2016).  
993 Accurate estimation of isoelectric point of protein and peptide based on amino acid  
994 sequences. *Bioinforma. Oxf. Engl.* 32, 821–827.
- 995 65. Klähn, S., Baumgartner, D., Pfreundt, U., Voigt, K., Schön, V., Steglich, C., and  
996 Hess, W.R. (2014). Alkane biosynthesis genes in cyanobacteria and their  
997 transcriptional organization. *Front. Bioeng. Biotechnol.* 2, 24.
- 998 66. Tamura, K., Nei, M., and Kumar, S. (2004). Prospects for inferring very large  
999 phylogenies by using the neighbor-joining method. *Proc. Natl. Acad. Sci. USA* 101,  
1000 11030–11035.
- 1001 67. Muro-Pastor, A.M. (2014). The heterocyst-specific NsiR1 small RNA is an early  
1002 marker of cell differentiation in cyanobacterial filaments. *mBio* 5, e01079-01014.
- 1003 68. Bonn, F., Bartel, J., Büttner, K., Hecker, M., Otto, A., and Becher, D. (2014). Picking  
1004 vanished proteins from the void: how to collect and ship/share extremely dilute  
1005 proteins in a reproducible and highly efficient manner. *Anal. Chem.* 86, 7421–7427.
- 1006 69. Tyanova, S., Temu, T., Sinitcyn, P., Carlson, A., Hein, M.Y., Geiger, T., Mann, M.,  
1007 and Cox, J. (2016). The Perseus computational platform for comprehensive  
1008 analysis of (prote)omics data. *Nat. Methods* 13, 731–740.

- 1009 70. Pinto, F.L., Thapper, A., Sontheim, W., and Lindblad, P. (2009). Analysis of current  
1010 and alternative phenol based RNA extraction methodologies for cyanobacteria.  
1011 *BMC Mol. Biol.* *10*, 79.
- 1012 71. Mohamed, A., and Jansson, C. (1989). Influence of light on accumulation of  
1013 photosynthesis-specific transcripts in the cyanobacterium *Synechocystis* 6803.  
1014 *Plant Mol. Biol.* *13*, 693–700.
- 1015 72. Dong, Y., and Xu, X. (2009). Outer membrane proteins induced by iron deficiency  
1016 in *Anabaena* sp. PCC 7120. *Prog. Nat. Sci.* *19*, 1477–1483.
- 1017 73. Krauspe, V., Fahrner, M., Spät, P., Steglich, C., Frankenberg-Dinkel, N., Maček,  
1018 B., Schilling, O., and Hess, W.R. (2021). Discovery of a novel small protein factor  
1019 involved in the coordinated degradation of phycobilisomes in cyanobacteria. *Proc.*  
1020 *Natl. Acad. Sci. USA* *118*, e2012277118.
- 1021
